# Supplementary material for: Transcriptome Analysis of Tolerant and Susceptible Maize Genotypes Reveals Novel Insights about the Molecular Mechanisms Underlying Drought Responses in Leaves
Source: MDPI journal article supplement (doi:10.3390/ijms22136980), 2021-06-29
Supplement: s1 [file s1]

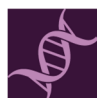

Article

# Transcriptome Analysis of Tolerant and Susceptible Maize Genotypes Reveals Novel Insights about the Molecular Mechanisms Underlying Drought Responses in Leaves

Joram Kiriga Waititu <sup>1,†</sup>, Xingen Zhang <sup>2,†</sup>, Tianci Chen <sup>2</sup>, Yang Zhao <sup>2,\*</sup> and Huan Wang <sup>1,3,\*</sup>

<sup>1</sup> Biotechnology Research Institute, Chinese Academy of Agricultural Sciences, Beijing 100081, China; joram.kiriga@gmail.com

<sup>2</sup> National Engineering Laboratory of Crop Stress Resistance Breeding, School of Life Sciences, Anhui Agricultural University, Hefei 230036, China; mubzs9r@qq.com (X.Z.); 1415987723@qq.com (T.C.)

<sup>3</sup> National Agricultural Science and Technology Center, Chengdu 610213, China

† These authors contributed equally to this work.

\* Correspondence: zhaoyang0521@163.com (Y.Z.); wanghuan@caas.cn (H.W.)

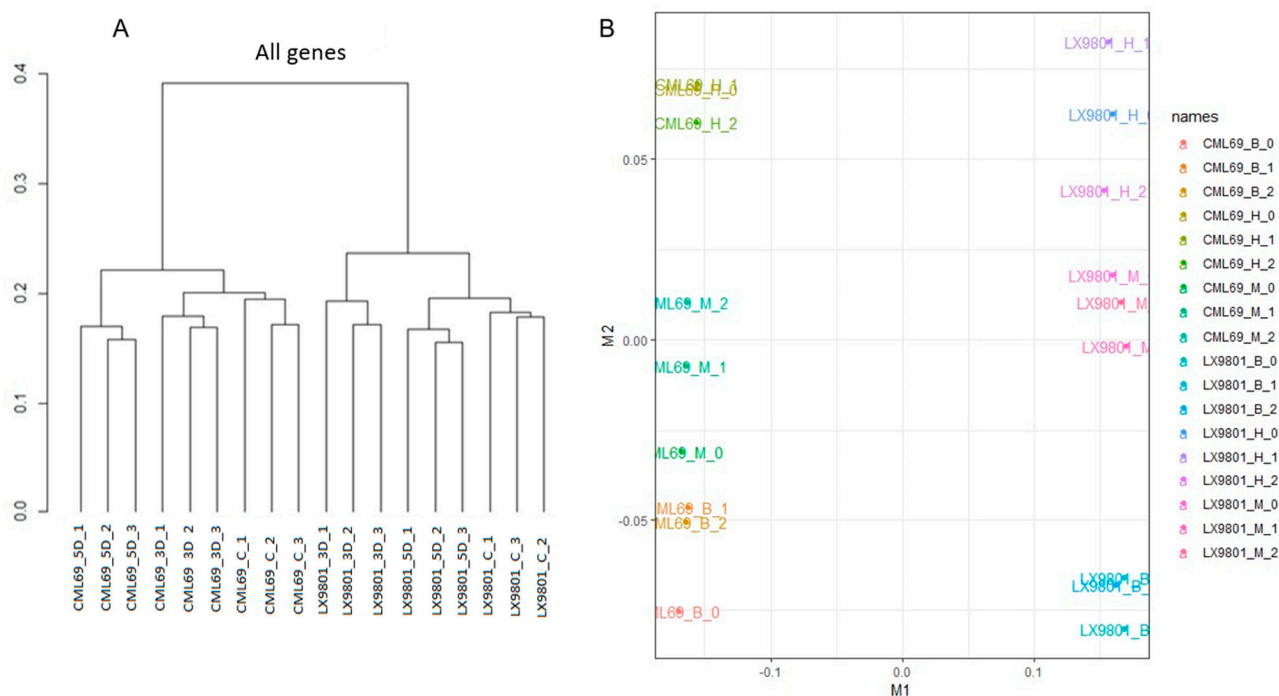

**Figure S1.** Correlation of the expression values of the biological replicates of both samples. **(A)** Dendrogram depicting correlation among replicates of the same sample on global expression profiles at C, 3D, and 5D drought stress. **(B)** Multidimensional scaling (MDS) plot analysis of the sample gene expression profiles. Each genotype was categorically grouped according to the similarity of individual replicates. B represents control (C), M represents three days (3D), while H represents five days (5D) drought treatment. 0, 1, 2 illustrates individual biological replications of the samples.

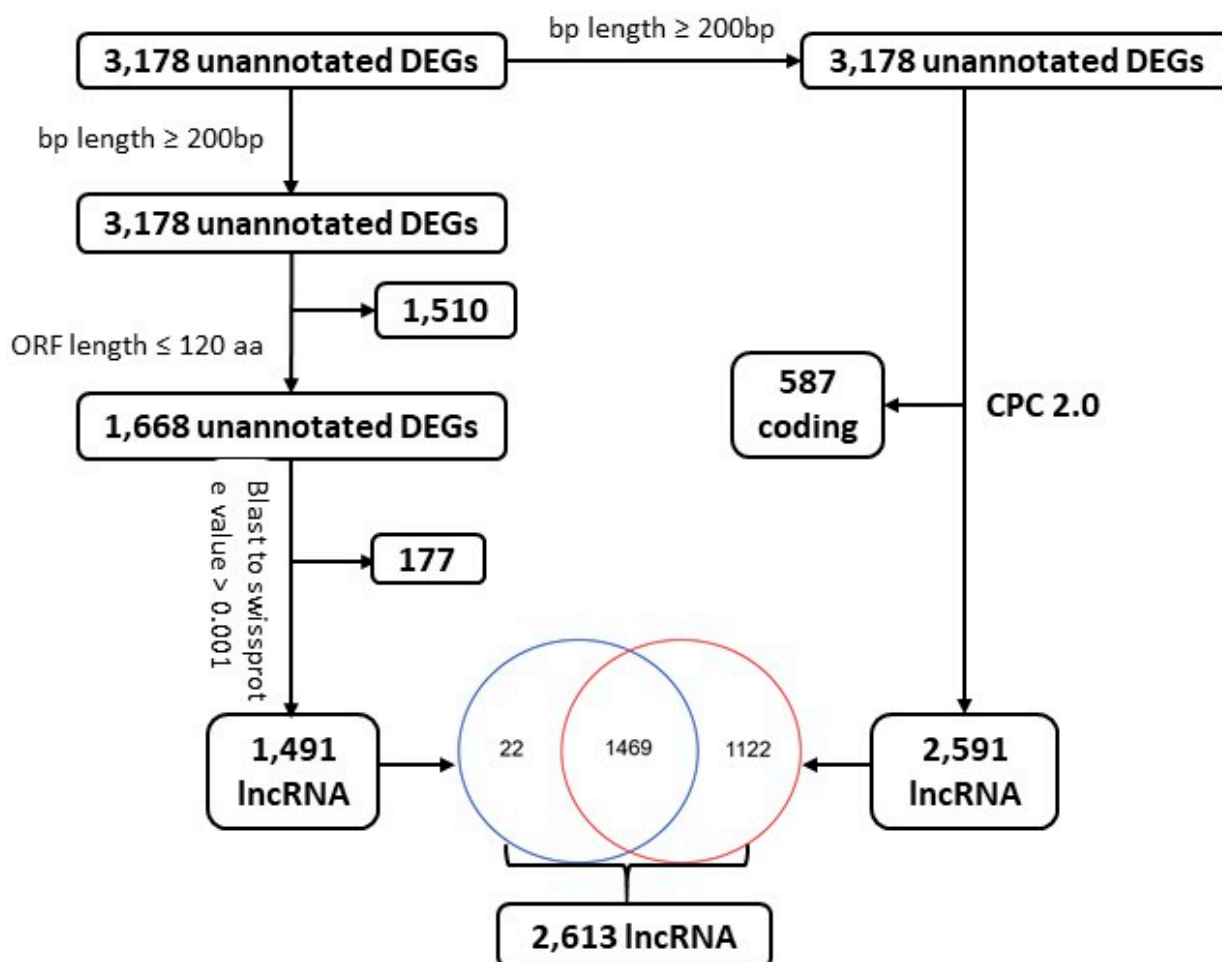

**Figure S2.** Analysis of 3,178 unannotated drought-responsive DEGs. CPC 2.0 generated 587 coding and 2,591 long non-coding RNAs. The ORF method generated 1,491 long non-coding RNAs. In total, 2,613 out of 3,178 were long non-coding RNAs.

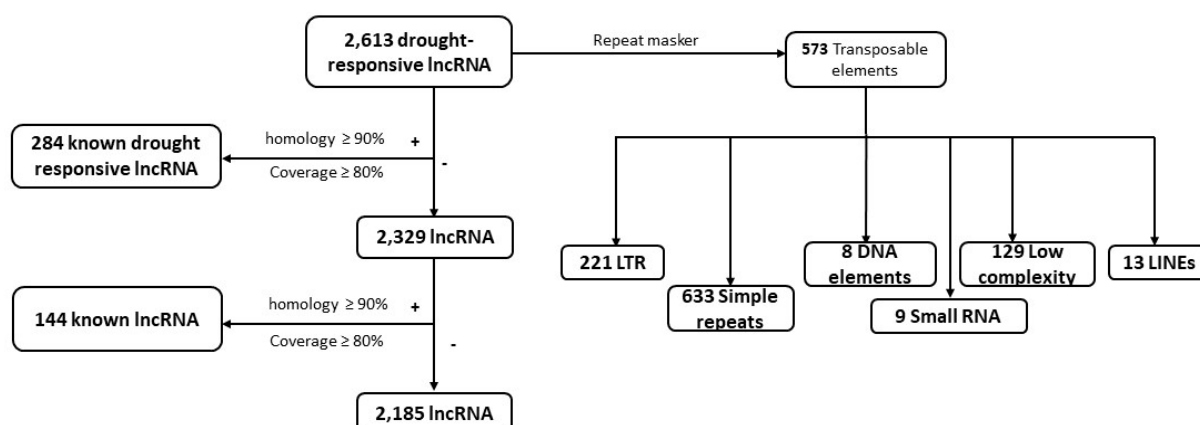

**Figure S3.** Analysis of 2,613 drought-responsive long non-coding RNAs (lncRNAs). 428 (284+144) are homologous to previously reported lncRNAs. 573 lncRNAs were identified to be Transposable elements (TEs) by RepeatMasker.
