# Supplementary material for: Transcriptome Analysis of Tolerant and Susceptible Maize Genotypes Reveals Novel Insights about the Molecular Mechanisms Underlying Drought Responses in Leaves
Source: Int J Mol Sci. 2021 Jun 29;22(13):6980. doi: 10.3390/ijms22136980 (PMC8268334; doi:10.3390/ijms22136980)
Supplement: Supplementary file 1 [file ijms-22-06980-s001.zip]

Archive with 13 entries (13 files):
- Supplementary figures.pdf
- Supplementary Tables/Table S1.xlsx
- Supplementary Tables/Table S10.xlsx
- Supplementary Tables/Table S11.xlsx
- Supplementary Tables/Table S12.xlsx
- Supplementary Tables/Table S2.xlsx
- Supplementary Tables/Table S3.xlsx
- Supplementary Tables/Table S4.xlsx
- Supplementary Tables/Table S5.xlsx
- Supplementary Tables/Table S6.xlsx
- Supplementary Tables/Table S7.xlsx
- Supplementary Tables/Table S8.xlsx
- Supplementary Tables/Table S9.xlsx
