# Supplementary material for: Transcriptome Analysis of Tolerant and Susceptible Maize Genotypes Reveals Novel Insights about the Molecular Mechanisms Underlying Drought Responses in Leaves
Source: Int J Mol Sci. 2021 Jun 29;22(13):6980. doi: 10.3390/ijms22136980 (PMC8268334; doi:10.3390/ijms22136980)
Supplement: Supplementary file 1 [file ijms-22-06980-s001.zip › Supplementary Tables/Table S1.xlsx]

## Sheet: Sheet1
Table S1. Summary of RNA sequencing results for the eighteen maize seedling leaf samples
Sample1	Rep2	Total Reads3	Clean Reads4	GC Content (%)5	% ≥ Q206	% ≥ Q307	Mapped Reads8
CML69_C	1	108304874	54152437	45	97	94	102,855,125 (94.97%)
CML69_C	2	88413804	44206902	47	97	94	88,303,065 (94.22%)
CML69_C	3	105739074	52869537	45	96	91	98,646,839 (93.29%)
CML69_3D	1	111122206	55561103	45	97	93	105,817,857 (95.23%)
CML69_3D	2	111532622	55766311	45	97	93	106,376,229 (95.38%)
CML69_3D	3	116720754	58360377	47	98	95	109,765,949 (94.04%)
CML69_5D	1	123687942	61843971	46	97	94	116,588,803 (94.26%)
CML69_5D	2	98550792	49275396	46	98	95	92,906,261 (94.27%)
CML69_5D	3	87933568	43966784	45	98	95	82988799 (94.38%)
LX9801_C	1	116448248	58224124	46	97	94	109,339,828 (93.9%)
LX9801_C	2	109467716	54733858	46	98	95	102,922,202 (94.02%)
LX9801_C	3	81493552	40746776	45	97	93	76,576,173 (93.97%)
LX9801_3D	1	112769084	56384542	46	97	94	106,277,044 (94.24%)
LX9801_3D	2	121211228	60605614	46	98	95	113,914,106 (93.98%)
LX9801_3D	3	114233826	57116913	45	96	92	106,427,963 (93.17%)
LX9801_5D	1	112444762	56222381	46	97	93	104,618,400 (93.04%)
LX9801_5D	2	91676390	45838195	48	97	94	84,510,864 (92.18%)
LX9801_5D	3	111058100	55529050	45	96	91	102,994,515 (92.74%)
1Sample, CML69 (tolerant line); LX9801 (susceptible line); C-(control), 3D-three days stress, 5D-five days drought stress; 2Rep., treatment repeat; 3Total reads, total clean reads counted by the single end; 4Clean reads, the total number of pair-end reads in clean data; 5GC content, clean data GC content, that is, the percentage of G and C bases out of total bases in the data; 6% ≥ Q20, the perce…
