# Supplementary material for: Transcriptome Analysis of Tolerant and Susceptible Maize Genotypes Reveals Novel Insights about the Molecular Mechanisms Underlying Drought Responses in Leaves
Source: Int J Mol Sci. 2021 Jun 29;22(13):6980. doi: 10.3390/ijms22136980 (PMC8268334; doi:10.3390/ijms22136980)
Supplement: Supplementary file 1 [file ijms-22-06980-s001.zip › Supplementary Tables/Table S2.xlsx]

## Sheet: Table S2
Table S2: 284 lncRNAs are homologous to known drought responsive lncRNAs in maize
LncRNA_ID	Known_lncRNA [37]	Query_length	Subject_length	Percent_identity	Hit_length	mismatch	gapopen	qstart	qend	sstart	send	bitscore	evalue	gaps	qcovs
XLOC_008121	TCONS_00037554	288	960	94.014	284	17	0	5	288	786	503	431	1.99e-122	0	99
XLOC_008121	TCONS_00012781	288	2252	91.339	254	18	4	37	288	1092	1343	344	2.66e-96	4	88
XLOC_008121	TCONS_00063402	288	1366	91.358	243	14	6	50	288	839	1078	326	9.65e-91	7	83
XLOC_008300	TCONS_00028510	318	2057	94.921	315	13	3	1	314	511	199	490	3.59e-140	3	99
XLOC_008300	TCONS_00012737	318	1956	93.91	312	17	2	1	312	512	203	470	4.68e-134	2	98
XLOC_008300	TCONS_00028696	318	666	93.891	311	17	2	2	312	444	136	468	1.68e-133	2	98
XLOC_008300	TCONS_00077757	318	574	91.667	312	23	3	1	312	341	33	429	7.95e-122	3	98
XLOC_008418	TCONS_00063420	365	535	91.185	363	29	3	1	361	149	510	490	4.16e-140	3	99
XLOC_008470	TCONS_00070259	403	1014	95.309	405	17	2	1	403	46	450	641	0	2	100
XLOC_008470	TCONS_00037517	403	1472	94.074	405	22	2	1	403	634	1038	614	2.62e-177	2	100
XLOC_008470	TCONS_00081788	403	2728	90.594	404	37	1	1	403	1456	1859	534	2.1e-153	1	100
XLOC_008600	TCONS_00070181	217	1684	97.664	214	4	1	4	217	295	507	366	4.21e-103	1	99
XLOC_008600	TCONS_00077784	217	1077	90.583	223	15	2	1	217	612	834	291	2.61e-80	6	100
XLOC_008840	TCONS_00037517	764	1472	90.141	781	49	14	1	756	355	1132	990	0	28	99
XLOC_008956	TCONS_00084197	334	1052	91.617	334	27	1	1	334	427	95	460	2.97e-131	1	100
XLOC_008992	TCONS_00070187	245	473	95.935	246	9	1	1	245	440	195	398	1.7e-112	1	100
XLOC_008992	TCONS_00016301	245	361	95.528	246	10	1	1	245	89	334	392	7.92e-111	1	100
XLOC_008992	TCONS_00046674	245	531	94.694	245	13	0	1	245	124	368	381	1.72e-107	0	100
XLOC_008992	TCONS_00084197	245	1052	92.181	243	17	2	1	241	754	996	342	8.09e-96	2	98
XLOC_008992	TCONS_00063574	245	729	92.797	236	15	2	1	234	442	207	340	2.91e-95	2	96
XLOC_008999	TCONS_00061891	265	1826	95.849	265	10	1	1	265	873	1136	427	2.35e-121	1	100
XLOC_009340	TCONS_00063402	613	1366	92.756	566	32	7	1	564	1112	554	809	0	9	92
XLOC_009340	TCONS_00056330	613	1153	90.391	614	54	4	1	610	527	1139	802	0	5	99
XLOC_009340	TCONS_00012781	613	2252	92.049	566	36	7	1	564	1377	819	787	0	9	92
XLOC_009598	TCONS_00037200	495	916	91.091	449	25	7	54	492	639	196	593	4.24e-171	15	89
XLOC_009598	GRMZM2G156376_T01	495	1569	95.238	42	2	0	1	42	1011	970	67.6	1.14e-12	0	97
XLOC_009754	TCONS_00070259	386	1014	95.866	387	14	2	1	386	67	452	625	1.16e-180	2	100
XLOC_009754	TCONS_00037517	386	1472	95.349	387	16	2	1	386	655	1040	614	2.51e-177	2	100
XLOC_009754	TCONS_00081788	386	2728	90.956	387	32	3	1	386	1477	1861	518	2.02e-148	3	100
XLOC_010332	TCONS_00070259	284	1014	97.887	284	6	0	1	284	197	480	492	8.86e-141	0	100
XLOC_010332	TCONS_00037517	284	1472	96.127	284	11	0	1	284	785	1068	464	1.93e-132	0	100
XLOC_010332	TCONS_00081788	284	2728	91.103	281	24	1	1	280	1606	1886	379	7.19e-107	1	99
XLOC_010332	TCONS_00063441	284	936	90.78	282	25	1	1	281	126	407	375	9.3e-106	1	99
XLOC_010354	TCONS_00037517	890	1472	95.029	865	38	4	1	863	492	1353	1354	0	5	97
XLOC_010354	TCONS_00070259	890	1014	94.451	793	38	5	97	888	1	788	1216	0	6	89
XLOC_010355	TCONS_00037517	583	1472	95.026	583	24	4	2	583	389	967	911	0	5	99
XLOC_010355	TCONS_00082174	583	1059	91.554	592	35	8	2	583	325	911	802	0	15	99
XLOC_010398	TCONS_00063392	253	683	96.047	253	10	0	1	253	39	291	412	6.3e-117	0	100
XLOC_010398	TCONS_00012731	253	807	95.257	253	11	1	1	253	288	539	399	4.9e-113	1	100
XLOC_010493	TCONS_00012973	557	850	100	466	0	0	92	557	1	466	861	0	0	84
XLOC_014253	TCONS_00037517	380	1472	97.895	380	8	0	1	380	1168	789	658	0	0	100
XLOC_014253	TCONS_00070259	380	1014	97.105	380	11	0	1	380	580	201	641	0	0	100
XLOC_014253	TCONS_00063441	380	936	91.385	325	27	1	57	380	454	130	444	3.43e-126	1	85
XLOC_014301	TCONS_00070259	677	1014	94.271	576	28	5	105	677	6	579	876	0	5	85
XLOC_014498	TCONS_00070181	340	1684	94.412	340	19	0	1	340	762	1101	523	3.8e-150	0	100
XLOC_014634	TCONS_00037517	1034	1472	92.865	967	43	14	91	1034	332	1295	1380	0	26	91
XLOC_014689	TCONS_00063441	432	936	91.395	430	36	1	4	432	461	32	588	1.71e-169	1	99
XLOC_014689	TCONS_00070259	432	1014	94.678	357	15	4	14	367	521	166	551	2.24e-158	4	82
XLOC_014689	TCONS_00037517	432	1472	94.183	361	15	4	11	367	1112	754	545	1.04e-156	6	83
XLOC_014753	TCONS_00037517	1108	1472	91.562	1114	74	15	1	1108	1206	107	1519	0	20	100
XLOC_014804	TCONS_00028510	437	2057	90.184	163	14	2	2	163	1427	1266	211	4.38e-56	2	99
XLOC_014856	TCONS_00063392	280	683	96.786	280	8	1	1	280	332	54	466	5.29e-133	1	100
XLOC_014856	TCONS_00012731	280	807	93.929	280	15	2	1	280	580	303	422	1.16e-119	2	100
XLOC_014968	TCONS_00012781	791	2252	90.955	796	51	14	1	787	425	1208	1051	0	21	99
XLOC_015027	TCONS_00028510	344	2057	95.665	346	12	3	1	344	152	496	553	4.91e-159	3	100
XLOC_015027	TCONS_00028696	344	666	94.493	345	17	2	1	344	87	430	531	2.3e-152	2	100
XLOC_015027	TCONS_00012737	344	1956	93.842	341	17	4	6	344	159	497	510	3e-146	4	99
XLOC_015027	TCONS_00077757	344	574	91.385	325	25	3	18	341	1	323	442	1.11e-125	3	94
XLOC_021626	TCONS_00037677	328	719	94.833	329	15	2	1	328	274	601	512	7.93e-147	2	100
XLOC_021742	TCONS_00028454	574	1104	100	574	0	0	1	574	531	1104	1061	0	0	100
XLOC_022106	TCONS_00037517	745	1472	94.102	746	41	2	1	745	1215	472	1131	0	3	100
XLOC_022106	TCONS_00070259	745	1014	96.82	629	17	2	1	628	627	1	1048	0	3	84
XLOC_022129	TCONS_00070259	383	1014	96.084	383	15	0	1	383	346	728	625	1.15e-180	0	100
XLOC_022129	TCONS_00037517	383	1472	95.538	381	17	0	3	383	936	1316	610	3.22e-176	0	99
XLOC_022129	TCONS_00012781	383	2252	91.437	327	24	4	60	383	1208	883	446	9.6e-127	4	85
XLOC_022129	TCONS_00063402	383	1366	91.131	327	25	4	60	383	943	618	440	4.47e-125	4	85
XLOC_022129	TCONS_00063399	383	4686	90.826	327	26	4	60	383	4652	4327	435	2.08e-123	4	85
XLOC_022183	TCONS_00028529	263	380	96.947	262	8	0	1	262	43	304	440	3.01e-125	0	99
XLOC_022183	TCONS_00056330	263	1153	96.578	263	9	0	1	263	1039	777	436	3.9e-124	0	100
XLOC_022183	TCONS_00063402	263	1366	94.697	264	10	3	1	263	604	864	407	3.05e-115	4	100
XLOC_022183	TCONS_00063399	263	4686	94.318	264	11	3	1	263	4313	4573	401	1.42e-113	4	100
XLOC_022183	TCONS_00012781	263	2252	92.045	264	17	3	1	263	869	1129	368	1.44e-103	4	100
XLOC_022226	TCONS_00056330	800	1153	91.574	807	60	7	1	800	850	45	1107	0	8	100
XLOC_022319	TCONS_00046468	308	1009	91.909	309	24	1	1	308	720	412	431	2.14e-122	1	100
XLOC_022401	TCONS_00028510	310	2057	96.463	311	10	1	1	310	493	183	512	7.46e-147	1	100
XLOC_022401	TCONS_00012737	310	1956	95.161	310	15	0	1	310	494	185	490	3.5e-140	0	100
XLOC_022401	TCONS_00028696	310	666	94.839	310	16	0	1	310	427	118	484	1.63e-138	0	100
XLOC_022401	TCONS_00077757	310	574	91.693	313	19	6	1	310	323	15	427	2.78e-121	7	100
XLOC_022411	TCONS_00037517	457	1472	94.311	457	22	4	1	455	765	311	697	0	4	99
XLOC_022411	TCONS_00037200	457	916	92.857	448	24	3	16	455	834	387	643	0	8	96
XLOC_022411	TCONS_00082174	457	1059	92.396	434	32	1	1	434	700	268	617	2.31e-178	1	95
XLOC_022411	TCONS_00012781	457	2252	91.126	462	31	6	1	457	1442	1898	617	2.31e-178	10	100
XLOC_022411	GRMZM2G156376_T01	457	1569	93.668	379	19	5	82	455	1066	688	562	1.1e-161	5	82
XLOC_022414	TCONS_00056330	316	1153	96.178	314	12	0	1	314	741	1054	514	2.12e-147	0	99
XLOC_022414	TCONS_00028529	316	380	95.86	314	13	0	1	314	341	28	508	9.85e-146	0	99
XLOC_022414	TCONS_00063402	316	1366	93.968	315	13	5	1	314	900	591	472	1.29e-134	6	99
XLOC_022414	TCONS_00063399	316	4686	93.651	315	14	5	1	314	4609	4300	466	6.02e-133	6	99
XLOC_022414	TCONS_00061891	316	1826	91.083	314	24	4	1	314	411	720	422	1.32e-119	4	99
XLOC_022460	TCONS_00028510	323	2057	97.531	324	7	1	1	323	187	510	553	4.59e-159	1	100
XLOC_022460	TCONS_00028696	323	666	96.573	321	11	0	3	323	124	444	532	5.99e-153	0	99
XLOC_022460	TCONS_00012737	323	1956	96.285	323	12	0	1	323	189	511	531	2.15e-152	0	100
XLOC_022460	TCONS_00077757	323	574	93.189	323	21	1	1	323	19	340	473	3.68e-135	1	100
XLOC_022482	TCONS_00061891	640	1826	97.712	612	12	2	1	612	610	1	1051	0	2	96
XLOC_022482	TCONS_00056330	640	1153	91.667	648	42	10	1	640	941	298	887	0	12	100
XLOC_022621	TCONS_00061891	596	1826	96.141	596	21	2	1	596	633	40	972	0	2	100
XLOC_022621	TCONS_00056330	596	1153	93.012	601	34	6	1	595	964	366	870	0	8	99
XLOC_022621	TCONS_00012768	596	1020	93.634	487	27	4	1	485	342	826	725	0	4	81
XLOC_022675	TCONS_00037517	1121	1472	95.965	1041	39	3	83	1121	1472	433	1687	0	3	93
XLOC_022675	TCONS_00070259	1121	1014	95.411	937	35	6	35	966	934	1	1485	0	8	83
XLOC_022714	TCONS_00063399	1915	4686	91.114	1328	91	18	1	1316	3939	2627	1773	0	27	96
XLOC_022735	TCONS_00082174	385	1059	95.052	384	15	3	1	384	646	267	601	1.95e-173	4	99
XLOC_022735	TCONS_00037200	385	916	93.35	391	15	6	1	383	795	408	568	1.98e-163	11	99
XLOC_022735	TCONS_00037517	385	1472	93.49	384	20	4	1	383	711	332	566	7.1e-163	5	99
XLOC_022735	TCONS_00012781	385	2252	92.248	387	18	9	1	383	1496	1874	538	1.55e-154	12	99
XLOC_022735	GRMZM2G156376_T01	385	1569	93.315	359	18	5	28	383	1066	711	525	1.21e-150	6	92
XLOC_022785	TCONS_00037470	528	1009	90	530	50	3	1	528	481	1009	682	0	3	100
XLOC_022785	TCONS_00063441	528	936	90.287	453	42	2	1	451	453	1	592	1.63e-170	2	85
XLOC_022896	TCONS_00037517	762	1472	91.001	789	38	22	1	762	384	1166	1033	0	33	100
XLOC_023161	TCONS_00070181	334	1684	93.413	334	21	1	1	334	815	483	494	2.93e-141	1	100
XLOC_023161	TCONS_00077784	334	1077	91.45	269	23	0	66	334	1077	809	370	5.15e-104	0	81
XLOC_023320	TCONS_00037517	839	1472	90.909	858	46	17	8	837	1305	452	1123	0	32	99
XLOC_023320	TCONS_00070259	839	1014	94.258	714	35	5	8	717	717	6	1086	0	6	85
XLOC_023455	TCONS_00070259	336	1014	91.691	337	21	5	1	336	759	429	460	2.99e-131	7	100
XLOC_023455	TCONS_00081788	336	2728	90	340	26	8	1	336	2173	1838	433	6.51e-123	8	100
XLOC_023461	TCONS_00070259	362	1014	96.961	362	11	0	1	362	450	811	608	1.09e-175	0	100
XLOC_023461	TCONS_00037517	362	1472	95.58	362	15	1	1	362	1038	1398	579	8.55e-167	1	100
XLOC_023461	TCONS_00012781	362	2252	92.603	365	23	4	1	362	1163	800	521	1.46e-149	4	100
XLOC_023461	TCONS_00063402	362	1366	92.055	365	25	4	1	362	898	535	510	3.16e-146	4	100
XLOC_023461	TCONS_00063399	362	4686	91.507	365	27	4	1	362	4607	4244	499	6.85e-143	4	100
XLOC_024377	TCONS_00012781	488	2252	97.137	489	10	3	1	488	526	1011	822	0	4	100
XLOC_024377	TCONS_00084197	488	1052	95.652	460	17	2	1	458	594	1052	736	0	3	94
XLOC_024377	TCONS_00012768	488	1020	95.4	413	17	2	76	488	1	411	656	0	2	85
XLOC_024377	TCONS_00070259	488	1014	95.181	415	19	1	74	488	1014	601	654	0	1	85
XLOC_024377	TCONS_00011516	488	599	91.793	463	27	7	1	458	457	1	634	0	11	94
XLOC_028840	TCONS_00084197	435	1052	90.566	424	34	5	14	435	31	450	556	4.86e-160	6	97
XLOC_028869	TCONS_00012781	267	2252	95.572	271	8	2	1	267	486	216	431	1.83e-122	4	100
XLOC_028869	TCONS_00070134	267	2956	94.074	270	12	2	1	267	527	795	407	3.09e-115	4	100
XLOC_028869	TCONS_00063399	267	4686	94.007	267	13	3	1	266	3887	3623	401	1.44e-113	3	99
XLOC_028890	TCONS_00056362	235	1829	94.397	232	13	0	1	232	786	1017	357	2.76e-100	0	99
XLOC_029149	TCONS_00081788	1317	2728	92.105	266	15	6	1	263	2651	2389	370	2.12e-103	6	100
XLOC_029409	TCONS_00056330	1053	1153	94.877	1054	52	2	1	1053	1148	96	1646	0	2	100
XLOC_029715	TCONS_00070259	423	1014	97.17	424	11	1	1	423	155	578	715	0	1	100
XLOC_029715	TCONS_00037517	423	1472	95.991	424	16	1	1	423	743	1166	688	0	1	100
XLOC_029715	TCONS_00063441	423	936	91.42	338	28	1	33	369	117	454	462	1.06e-131	1	80
XLOC_029723	TCONS_00056362	500	1829	91.417	501	42	1	1	500	569	1069	686	0	1	100
XLOC_029752	TCONS_00037517	579	1472	94.138	580	29	4	1	579	345	920	878	0	5	100
XLOC_029752	TCONS_00082174	579	1059	91.017	590	36	11	1	579	281	864	780	0	17	100
XLOC_029752	TCONS_00037200	579	916	90.984	488	29	10	1	477	421	904	643	0	15	82
XLOC_029752	TCONS_00012781	579	2252	90.269	483	33	11	1	477	1861	1387	619	8.23e-179	14	82
XLOC_029959	TCONS_00012781	551	2252	96.014	552	19	3	1	550	1635	1085	894	0	3	99
XLOC_029959	TCONS_00063402	551	1366	94.679	545	28	1	7	550	1364	820	845	0	1	99
XLOC_029980	TCONS_00070259	916	1014	92.5	760	45	10	165	916	808	53	1077	0	12	82
XLOC_029980	TCONS_00037517	916	1472	91.974	760	48	11	165	916	1395	641	1053	0	13	82
XLOC_030057	TCONS_00070259	312	1014	98.397	312	5	0	1	312	515	204	549	5.73e-158	0	100
XLOC_030057	TCONS_00037517	312	1472	96.474	312	11	0	1	312	1103	792	516	5.81e-148	0	100
XLOC_030057	TCONS_00081788	312	2728	90.764	314	27	2	1	312	1926	1613	418	1.69e-118	2	100
XLOC_030057	TCONS_00063441	312	936	90.415	313	29	1	1	312	445	133	411	2.82e-116	1	100
XLOC_030057	TCONS_00082174	312	1059	95.2	250	11	1	29	278	1018	770	394	2.84e-111	1	80
XLOC_030111	TCONS_00070259	415	1014	97.108	415	12	0	1	415	72	486	701	0	0	100
XLOC_030111	TCONS_00037517	415	1472	96.627	415	14	0	1	415	660	1074	689	0	0	100
XLOC_030111	TCONS_00082174	415	1059	91.08	426	24	8	1	415	595	1017	564	2.76e-162	14	100
XLOC_030111	TCONS_00081788	415	2728	91.084	415	34	3	3	415	1484	1897	558	1.29e-160	3	99
XLOC_030179	TCONS_00070134	643	2956	92.366	655	37	7	1	643	688	1341	920	0	13	100
XLOC_030179	TCONS_00063399	643	4686	90.84	655	43	12	1	640	3726	3074	861	0	17	99
XLOC_030237	TCONS_00070259	239	1014	92.116	241	16	3	1	239	270	31	337	3.67e-94	3	100
XLOC_030237	TCONS_00037517	239	1472	93.333	225	13	2	1	223	858	634	331	1.71e-92	2	93
XLOC_030237	TCONS_00081788	239	2728	90.171	234	22	1	7	239	1673	1440	303	3.72e-84	1	97
XLOC_030385	TCONS_00032140	251	856	91.829	257	13	8	1	251	481	735	351	1.38e-98	8	100
XLOC_030387	TCONS_00070259	572	1014	93.241	577	32	4	1	572	781	207	843	0	7	100
XLOC_030387	TCONS_00037517	572	1472	92.561	578	34	6	1	572	1369	795	821	0	9	100
XLOC_036332	TCONS_00063402	375	1366	94.933	375	18	1	1	374	1325	951	586	5.3e-169	1	99
XLOC_036332	TCONS_00012781	375	2252	94.149	376	19	3	1	374	1590	1216	569	5.34e-164	3	99
XLOC_036431	TCONS_00037517	741	1472	90.992	766	39	16	1	741	340	1100	1005	0	30	100
XLOC_036436	TCONS_00012781	366	2252	96.089	358	12	2	1	357	1099	1455	582	6.69e-168	2	98
XLOC_036436	TCONS_00063402	366	1366	95.556	360	15	1	1	360	834	1192	575	1.12e-165	1	98
XLOC_036451	TCONS_00063402	719	1366	95.41	719	33	0	1	719	619	1337	1146	0	0	100
XLOC_036451	TCONS_00012781	719	2252	94.313	721	37	4	1	719	884	1602	1101	0	4	100
XLOC_036451	TCONS_00056330	719	1153	90.909	715	59	6	9	719	1014	302	955	0	6	99
XLOC_036510	TCONS_00063441	419	936	91.667	420	34	1	1	419	35	454	580	2.77e-167	1	100
XLOC_036510	TCONS_00070259	419	1014	95.506	356	14	2	63	416	166	521	568	2.16e-163	2	84
XLOC_036510	TCONS_00037517	419	1472	94.986	359	16	2	63	419	754	1112	562	1e-161	2	85
XLOC_036510	TCONS_00056395	419	997	90.238	420	39	2	1	419	84	502	547	2.81e-157	2	100
XLOC_036516	TCONS_00012781	331	2252	97.289	332	8	1	1	331	866	1197	562	7.83e-162	1	100
XLOC_036516	TCONS_00063402	331	1366	96.084	332	12	1	1	331	601	932	540	3.67e-155	1	100
XLOC_036516	TCONS_00063399	331	4686	95.783	332	13	1	1	331	4310	4641	534	1.71e-153	1	100
XLOC_036516	TCONS_00012768	331	1020	94.562	331	18	0	1	331	267	597	512	8e-147	0	100
XLOC_036516	TCONS_00070259	331	1014	93.976	332	17	3	1	331	745	416	499	6.23e-143	3	100
XLOC_036538	TCONS_00082174	248	1059	95.928	221	6	3	20	239	485	267	355	1.05e-99	3	89
XLOC_036538	TCONS_00037200	248	916	93.991	233	5	4	14	238	639	408	344	2.28e-96	9	91
XLOC_036538	TCONS_00012781	248	2252	95.567	203	5	3	39	238	1673	1874	322	1.07e-89	4	81
XLOC_036538	TCONS_00037517	248	1472	92.793	222	10	6	20	238	550	332	316	4.97e-88	6	88
XLOC_036538	GRMZM2G156376_T01	248	1569	92.377	223	12	5	20	238	932	711	313	6.43e-87	5	88
XLOC_037057	TCONS_00037554	391	960	92.583	391	28	1	1	391	414	803	560	3.36e-161	1	100
XLOC_037060	TCONS_00070259	422	1014	97.163	423	11	1	1	422	144	566	713	0	1	100
XLOC_037060	TCONS_00037517	422	1472	95.981	423	16	1	1	422	732	1154	686	0	1	100
XLOC_037185	TCONS_00056362	292	1829	90.878	296	22	3	2	292	1101	806	392	9.52e-111	5	99
XLOC_037422	TCONS_00070259	842	1014	94.299	842	48	0	1	842	848	7	1290	0	0	100
XLOC_037422	TCONS_00037517	842	1472	93.468	842	54	1	1	842	1435	595	1249	0	1	100
XLOC_037484	TCONS_00028510	228	2057	98.678	227	3	0	1	227	265	39	403	3.39e-114	0	99
XLOC_037484	TCONS_00012737	228	1956	93.833	227	13	1	1	227	267	42	340	2.69e-95	1	99
XLOC_037484	TCONS_00028696	228	666	96.5	200	7	0	1	200	200	1	331	1.62e-92	0	88
XLOC_037484	TCONS_00032140	228	856	92.576	229	13	4	1	227	856	630	326	7.54e-91	4	99
XLOC_037484	TCONS_00012731	228	807	90.517	232	15	4	1	228	274	46	300	4.57e-83	7	100
XLOC_037602	TCONS_00070134	1530	2956	91.525	1180	78	18	80	1245	1511	340	1605	0	22	95
XLOC_037867	TCONS_00032140	406	856	92.701	411	21	9	1	405	824	417	584	2.07e-168	9	99
XLOC_038031	TCONS_00018601	370	781	91.914	371	23	6	1	366	119	487	512	9e-147	7	99
XLOC_038031	TCONS_00046607	370	641	90.659	364	24	9	6	364	2	360	475	1.18e-135	10	97
XLOC_043755	TCONS_00070259	322	1014	96.364	275	10	0	48	322	519	245	453	4.78e-129	0	85
XLOC_043755	TCONS_00037517	322	1472	93.704	270	17	0	51	320	1104	835	405	1.36e-114	0	84
XLOC_043755	TCONS_00082174	322	1059	90.071	282	25	3	43	322	1057	777	363	8.28e-102	3	87
XLOC_043974	TCONS_00070181	286	1684	94.755	286	14	1	1	286	677	393	444	2.53e-126	1	100
XLOC_043974	TCONS_00077784	286	1077	90.102	293	21	4	1	286	1004	713	374	3.37e-105	8	100
XLOC_044094	TCONS_00070259	333	1014	97.531	324	7	1	1	324	223	545	553	4.75e-159	1	97
XLOC_044094	TCONS_00037517	333	1472	96.594	323	10	1	1	323	811	1132	534	1.72e-153	1	97
XLOC_044094	TCONS_00063441	333	936	90	300	29	1	1	299	152	451	387	5.09e-109	1	90
XLOC_044094	TCONS_00082174	333	1059	90.722	291	24	3	16	304	770	1059	385	1.83e-108	3	87
XLOC_044123	TCONS_00028510	507	2057	97.244	508	13	1	1	507	548	41	859	0	1	100
XLOC_044123	TCONS_00012737	507	1956	94.872	507	25	1	1	507	549	44	791	0	1	100
XLOC_044123	TCONS_00028696	507	666	96.242	479	18	0	4	482	479	1	785	0	0	94
XLOC_044313	TCONS_00070259	318	1014	98.387	310	5	0	9	318	521	212	545	7.56e-157	0	97
XLOC_044313	TCONS_00037517	318	1472	97.125	313	9	0	6	318	1112	800	529	7.62e-152	0	98
XLOC_044313	TCONS_00063441	318	936	91.195	318	27	1	1	317	459	142	431	2.21e-122	1	99
XLOC_044313	TCONS_00081788	318	2728	91.205	307	25	2	13	317	1928	1622	416	6.19e-118	2	96
XLOC_044324	TCONS_00012781	451	2252	95.575	452	19	1	1	451	1336	885	723	0	1	100
XLOC_044324	TCONS_00063402	451	1366	95.354	452	20	1	1	451	1071	620	717	0	1	100
XLOC_044513	TCONS_00032140	364	856	93.506	308	14	6	61	364	856	551	453	5.44e-129	6	84
XLOC_044513	TCONS_00012731	364	807	90.448	335	28	4	1	332	334	1	438	1.52e-124	4	91
XLOC_044513	TCONS_00028510	364	2057	90.939	309	23	5	14	317	313	5	411	3.32e-116	5	84
XLOC_044656	TCONS_00070134	672	2956	93.501	677	37	5	1	672	1465	791	1000	0	7	100
XLOC_044656	TCONS_00063399	672	4686	92.522	682	36	11	1	672	2949	3625	963	0	15	100
XLOC_044671	TCONS_00056330	311	1153	92.208	308	24	0	1	308	50	357	436	4.64e-124	0	99
XLOC_044783	TCONS_00037517	950	1472	90.102	980	59	22	1	950	1345	374	1238	0	38	100
XLOC_044838	TCONS_00037517	710	1472	93.539	712	39	6	1	710	332	1038	1053	0	7	100
XLOC_044838	TCONS_00082174	710	1059	90.922	716	48	11	1	705	268	977	946	0	17	99
XLOC_044881	TCONS_00028501	350	1420	91.785	353	26	1	1	350	1053	701	488	1.43e-139	3	100
XLOC_044902	TCONS_00070181	322	1684	94.72	322	17	0	1	322	661	982	501	1.68e-143	0	100
XLOC_049844	TCONS_00037517	1129	1472	90.777	965	50	25	1	935	445	1400	1253	0	39	83
XLOC_050045	TCONS_00070134	542	2956	91.818	550	35	7	1	541	882	1430	758	0	10	99
XLOC_050046	TCONS_00070259	493	1014	95.297	489	21	2	3	490	114	601	774	0	2	99
XLOC_050046	TCONS_00037517	493	1472	94.512	492	23	4	1	490	700	1189	756	0	4	99
XLOC_050054	TCONS_00028510	413	2057	98.063	413	8	0	1	413	68	480	719	0	0	100
XLOC_050054	TCONS_00028696	413	666	95.157	413	19	1	1	413	3	414	651	0	1	100
XLOC_050054	TCONS_00012737	413	1956	94.431	413	21	2	1	413	71	481	634	0	2	100
XLOC_050216	TCONS_00070259	489	1014	96.099	487	18	1	2	487	627	141	793	0	1	99
XLOC_050216	TCONS_00037517	489	1472	95.902	488	19	1	1	487	1216	729	789	0	1	99
XLOC_050483	TCONS_00046525	363	515	90.572	297	24	4	68	363	1	294	390	4.31e-110	4	82
XLOC_050602	TCONS_00070259	654	1014	96.289	539	13	5	119	653	934	399	878	0	7	82
XLOC_050602	TCONS_00063402	654	1366	90.992	655	46	11	1	646	292	942	870	0	13	99
XLOC_050602	TCONS_00063399	654	4686	90.992	655	46	11	1	646	4001	4651	870	0	13	99
XLOC_050771	TCONS_00070181	420	1684	95.455	418	19	0	1	418	963	546	667	0	0	99
XLOC_050793	TCONS_00070259	378	1014	97.082	377	10	1	3	378	517	141	634	0	1	99
XLOC_050793	TCONS_00037517	378	1472	96.277	376	13	1	4	378	1104	729	616	6.82e-178	1	99
XLOC_050793	TCONS_00063441	378	936	90.691	333	30	1	1	332	449	117	442	1.23e-125	1	88
XLOC_050844	TCONS_00070134	455	2956	94.323	458	23	3	1	455	1297	840	699	0	3	100
XLOC_050844	TCONS_00063399	455	4686	91.793	463	29	7	1	455	3115	3576	636	0	9	100
XLOC_055103	TCONS_00028510	362	2057	98.066	362	6	1	1	361	191	552	628	0	1	99
XLOC_055103	TCONS_00012737	362	1956	96.133	362	12	2	1	361	193	553	590	3.95e-170	2	99
XLOC_055103	TCONS_00028696	362	666	95.014	361	17	1	1	361	126	485	566	6.66e-163	1	99
XLOC_055103	TCONS_00077757	362	574	92.837	363	23	3	1	362	23	383	523	4.06e-150	3	100
XLOC_055168	TCONS_00056330	868	1153	92.229	875	60	7	1	868	45	918	1232	0	8	100
XLOC_055238	TCONS_00012781	1059	2252	95.484	1063	37	9	4	1059	1915	857	1687	0	11	99
XLOC_055380	TCONS_00046468	221	1009	92.661	218	14	1	3	218	562	779	313	5.68e-87	2	98
XLOC_055392	TCONS_00028510	232	2057	96.957	230	6	1	1	229	496	267	385	1.25e-108	1	99
XLOC_055392	TCONS_00012737	232	1956	96.507	229	8	0	1	229	497	269	379	5.82e-107	0	99
XLOC_055392	TCONS_00028696	232	666	96.07	229	9	0	1	229	430	202	374	2.71e-105	0	99
XLOC_055392	TCONS_00077757	232	574	93.913	230	7	6	4	230	323	98	340	2.74e-95	7	98
XLOC_055625	TCONS_00070259	272	1014	97.794	272	6	0	1	272	204	475	470	3.96e-134	0	100
XLOC_055625	TCONS_00037517	272	1472	96.324	272	10	0	1	272	792	1063	448	1.86e-127	0	100
XLOC_055625	TCONS_00081788	272	2728	91.575	273	22	1	1	272	1613	1885	375	8.88e-106	1	100
XLOC_055625	TCONS_00063441	272	936	91.575	273	22	1	1	272	133	405	375	8.88e-106	1	100
XLOC_055625	TCONS_00082174	272	1059	94.538	238	12	1	35	272	770	1006	366	5.35e-103	1	88
XLOC_055754	TCONS_00037517	831	1472	91.696	855	46	13	1	831	1300	447	1162	0	25	100
XLOC_055754	TCONS_00070259	831	1014	95.091	713	31	4	1	711	712	2	1120	0	4	86
XLOC_055757	TCONS_00081788	1507	2728	92.827	237	12	5	1273	1506	2416	2650	339	6.83e-94	5	98
XLOC_055807	TCONS_00056395	401	997	95.174	373	18	0	1	373	625	997	590	4.4e-170	0	93
XLOC_055860	TCONS_00070181	230	1684	96.087	230	9	0	1	230	455	226	375	7.45e-106	0	100
XLOC_056237	TCONS_00070134	764	2956	91.417	769	54	7	4	764	687	1451	1044	0	12	99
XLOC_056237	TCONS_00063399	764	4686	91.429	770	52	9	4	764	3727	2963	1044	0	14	99
XLOC_056369	TCONS_00070134	704	2956	91.972	710	44	9	2	704	489	1192	983	0	13	99
XLOC_056369	TCONS_00063399	704	4686	90.309	712	54	11	2	704	3925	3220	918	0	15	99
XLOC_061169	TCONS_00037554	550	960	90.092	545	44	6	5	549	960	426	699	0	10	99
XLOC_061212	TCONS_00070259	532	1014	95.113	532	24	1	1	532	779	250	837	0	2	100
XLOC_061212	TCONS_00037517	532	1472	94.361	532	28	1	1	532	1367	838	815	0	2	100
XLOC_061456	TCONS_00012781	1399	2252	90	1360	114	18	1	1353	751	2095	1738	0	22	97
XLOC_061469	TCONS_00012737	588	1956	92.881	590	28	11	1	588	162	739	845	0	14	100
XLOC_061469	TCONS_00028510	588	2057	92.034	590	27	8	1	588	160	731	811	0	20	100
XLOC_061469	TCONS_00028696	588	666	91.126	586	37	7	1	585	95	666	780	0	15	99
XLOC_061469	TCONS_00077757	588	574	90.609	575	40	11	10	583	1	562	750	0	14	98
XLOC_061571	TCONS_00012781	620	2252	94.24	625	28	5	1	620	258	879	948	0	8	100
XLOC_061571	TCONS_00011516	620	599	93.387	499	23	7	126	620	596	104	730	0	10	80
XLOC_061571	TCONS_00063399	620	4686	90.799	413	30	8	3	410	3665	4074	545	1.52e-156	8	99
XLOC_061571	TCONS_00063399	620	4686	94.581	203	11	0	418	620	4121	4323	315	4.65e-87	0	99
XLOC_061604	TCONS_00032140	348	856	91.477	352	21	9	1	348	820	474	475	1.11e-135	9	100
XLOC_061828	TCONS_00084214	395	544	95.918	343	14	0	53	395	544	202	556	4.39e-160	0	87
XLOC_061828	TCONS_00026180	395	1697	93.314	344	20	3	1	343	1353	1694	505	1.61e-144	3	87
XLOC_061835	GRMZM2G523064_T01	407	747	90.511	411	31	7	1	407	332	738	536	5.91e-154	8	100
XLOC_061907	TCONS_00084197	497	1052	95.556	495	20	2	1	493	974	480	791	0	2	99
XLOC_061907	TCONS_00012781	497	2252	94.595	481	24	2	15	494	890	411	743	0	2	97
XLOC_061907	TCONS_00011516	497	599	92.786	499	26	7	1	494	79	572	713	0	10	99
XLOC_061907	TCONS_00063574	497	729	92.57	498	33	4	1	494	221	718	712	0	4	99
XLOC_062068	TCONS_00082174	211	1059	96.209	211	6	2	1	211	475	267	344	1.91e-96	2	100
XLOC_062068	TCONS_00037200	211	916	95.098	204	8	2	8	210	610	408	320	3.22e-89	2	96
XLOC_062068	TCONS_00012781	211	2252	94.089	203	9	2	10	210	1673	1874	305	9.03e-85	3	95
XLOC_062068	TCONS_00037517	211	1472	91.981	212	12	5	1	210	540	332	292	7.03e-81	5	99
XLOC_062068	GRMZM2G156376_T01	211	1569	91.509	212	14	4	2	210	921	711	289	9.09e-80	4	99
XLOC_062075	TCONS_00012781	1484	2252	94.903	1491	64	9	1	1482	1899	412	2322	0	12	99
XLOC_062075	TCONS_00063402	1484	1366	94.229	953	49	5	269	1215	1364	412	1450	0	6	81
XLOC_062075	TCONS_00063402	1484	1366	91.255	263	19	4	1223	1482	365	104	355	6.68e-99	4	81
XLOC_062118	TCONS_00070259	858	1014	92.743	813	48	9	11	817	6	813	1164	0	11	94
XLOC_062118	TCONS_00037517	858	1472	91.697	819	53	13	1	811	584	1395	1122	0	15	95
XLOC_064198	TCONS_00012781	1417	2252	92.626	1424	89	14	1	1416	486	1901	2034	0	16	99
XLOC_066679	TCONS_00012781	714	2252	94.219	640	33	4	1	638	1049	412	974	0	4	89
XLOC_066679	TCONS_00084197	714	1052	93.739	575	31	4	69	639	1052	479	857	0	5	80
XLOC_066679	TCONS_00011516	714	599	92.535	576	32	10	69	638	1	571	815	0	11	80
XLOC_066773	TCONS_00070134	897	2956	92.865	897	57	5	1	892	471	1365	1295	0	7	99
XLOC_066773	TCONS_00063399	897	4686	92.044	905	59	10	1	897	3943	3044	1260	0	13	100
XLOC_066919	TCONS_00037517	825	1472	94.046	823	47	2	3	825	1363	543	1247	0	2	99
XLOC_066919	TCONS_00070259	825	1014	95.238	777	35	2	3	779	775	1	1229	0	2	94
XLOC_066993	TCONS_00037517	793	1472	94.584	794	36	6	1	793	1123	336	1221	0	7	100
XLOC_066993	TCONS_00082174	793	1059	90.339	797	55	16	10	793	1059	272	1026	0	22	99
XLOC_067007	TCONS_00012731	305	807	94.444	306	15	2	1	305	202	506	470	4.48e-134	2	100
XLOC_067007	TCONS_00063392	305	683	96.875	256	7	1	51	305	3	258	427	2.73e-121	1	84
XLOC_067308	TCONS_00061891	669	1826	95.401	674	24	6	1	669	490	1161	1066	0	7	100
XLOC_067308	TCONS_00063399	669	4686	91.311	679	44	12	1	669	4530	3857	913	0	15	100
XLOC_067308	TCONS_00063402	669	1366	91.016	679	46	12	1	669	821	148	902	0	15	100
XLOC_067308	TCONS_00070134	669	2956	92.199	564	33	7	110	669	1	557	787	0	11	84
XLOC_067308	TCONS_00012781	669	2252	94.033	419	16	7	1	413	1086	671	627	0	9	94
XLOC_067308	TCONS_00012781	669	2252	90.741	216	17	2	454	669	668	456	285	3.95e-78	3	94
XLOC_067309	TCONS_00070134	319	2956	94.704	321	15	2	1	319	1049	1369	497	2.15e-142	2	100
XLOC_067309	TCONS_00063399	319	4686	93.146	321	18	3	1	319	3363	3045	468	1.69e-133	4	100
XLOC_067409	TCONS_00063404	220	1528	95.928	221	8	1	1	220	5	225	357	2.57e-100	1	100
XLOC_067409	TCONS_00012781	220	2252	93.243	222	11	4	1	219	1676	1896	324	2.61e-90	4	99
XLOC_067409	TCONS_00037517	220	1472	93.243	222	10	5	1	220	528	310	322	9.38e-90	5	100
XLOC_067409	TCONS_00081788	220	2728	92.308	221	13	4	1	219	1370	1152	311	2.03e-86	4	99
XLOC_067409	TCONS_00037200	220	916	91.403	221	17	2	1	220	605	386	302	1.22e-83	2	100
XLOC_008169	TCONS_00070259	772	1014	90.095	737	52	14	41	772	813	93	937	0	21	95
XLOC_008402	TCONS_00070181	450	1684	94	450	26	1	1	450	405	853	680	0	1	100
XLOC_008572	TCONS_00063441	322	936	93.103	319	22	0	4	322	385	67	468	1.71e-133	0	99
XLOC_008572	TCONS_00070259	322	1014	94.915	295	11	4	1	292	459	166	459	1.03e-130	4	91
XLOC_008572	TCONS_00037517	322	1472	94.257	296	11	4	1	292	1047	754	448	2.22e-127	6	91
XLOC_008572	TCONS_00037470	322	1009	90.909	319	28	1	1	319	546	863	427	2.9e-121	1	99
XLOC_008572	TCONS_00056395	322	997	90.282	319	30	1	4	322	433	116	416	6.27e-118	1	99
XLOC_008877	TCONS_00018641	307	1204	91.638	287	22	2	1	286	577	292	396	7.76e-112	2	93
XLOC_008877	TCONS_00026180	307	1697	91.065	291	18	3	18	307	1234	1517	387	4.67e-109	8	94
XLOC_008953	TCONS_00084214	350	544	90.057	352	20	11	1	350	462	124	442	1.13e-125	15	100
XLOC_008955	TCONS_00056362	1067	1829	91.111	945	79	3	2	941	197	1141	1275	0	5	88
XLOC_009002	TCONS_00037517	689	1472	90.056	714	42	15	1	689	1041	332	898	0	29	100
XLOC_009031	TCONS_00037517	1007	1472	90.81	1012	56	24	2	984	1335	332	1319	0	37	98
XLOC_009079	TCONS_00061891	233	1826	99.142	233	2	0	1	233	340	108	420	3.44e-119	0	100
XLOC_009079	TCONS_00056330	233	1153	93.617	235	12	3	1	233	667	434	348	1.65e-97	3	100
XLOC_009079	TCONS_00012768	233	1020	94.737	190	10	0	1	190	637	826	296	6.05e-82	0	82
XLOC_009158	TCONS_00012781	1365	2252	90.438	1255	88	22	112	1351	2081	844	1624	0	32	91
XLOC_009203	TCONS_00046468	456	1009	94.43	395	22	0	13	407	395	1	608	1.39e-175	0	87
XLOC_009458	TCONS_00070134	769	2956	93.806	775	39	5	1	769	600	1371	1157	0	9	100
XLOC_009458	TCONS_00063399	769	4686	92.031	778	47	10	1	769	3814	3043	1079	0	15	100
XLOC_009497	TCONS_00056362	433	1829	90.762	433	39	1	2	433	1080	648	577	3.71e-166	1	99
XLOC_009556	TCONS_00070134	948	2956	91.667	972	54	7	3	948	1512	542	1321	0	27	99
XLOC_009556	TCONS_00063399	948	4686	90.164	976	65	13	1	948	2900	3872	1242	0	31	100
XLOC_009601	TCONS_00070134	969	2956	94.31	826	40	4	1	822	1352	530	1258	0	7	85
XLOC_009601	TCONS_00063399	969	4686	92.668	832	44	12	1	823	3062	3885	1182	0	17	99
XLOC_009601	TCONS_00063399	969	4686	91.156	147	13	0	820	966	3846	3992	200	2.15e-52	0	99
XLOC_009670	TCONS_00046446	305	1178	94.098	305	18	0	1	305	451	147	464	2.08e-132	0	100
XLOC_009748	TCONS_00037517	938	1472	93.93	939	46	8	1	937	1313	384	1408	0	11	99
XLOC_009748	TCONS_00081788	938	2728	93.909	197	11	1	742	937	1421	1225	296	2.58e-81	1	97
XLOC_009879	TCONS_00070181	1033	1684	93.539	1006	63	2	1	1005	522	1526	1496	0	2	97
XLOC_009950	TCONS_00070259	741	1014	93.91	624	34	3	8	628	717	95	939	0	4	84
XLOC_009950	TCONS_00037517	741	1472	93.44	625	35	5	8	628	1305	683	922	0	6	92
XLOC_009950	TCONS_00037517	741	1472	91.667	60	4	1	634	693	390	332	82.4	6.17e-17	1	92
XLOC_010095	TCONS_00056330	441	1153	92.986	442	29	2	1	441	532	92	643	0	2	100
XLOC_010095	TCONS_00037200	441	916	92.394	447	22	7	4	441	916	473	627	0	12	99
XLOC_010095	TCONS_00082174	441	1059	91.176	442	35	4	1	441	770	332	597	2.9e-172	4	100
XLOC_010095	TCONS_00012781	441	2252	90.766	444	32	7	1	441	1372	1809	584	2.26e-168	9	100
XLOC_010095	TCONS_00037517	441	1472	90.974	421	34	4	16	435	818	401	564	2.95e-162	4	95
XLOC_010163	TCONS_00056362	321	1829	92.332	313	16	3	10	321	1142	1447	438	1.33e-124	8	97
XLOC_010207	TCONS_00070259	471	1014	96.391	471	17	0	1	471	569	99	776	0	0	100
XLOC_010207	TCONS_00037517	471	1472	95.966	471	19	0	1	471	1157	687	765	0	0	100
XLOC_010210	TCONS_00037517	522	1472	95.577	520	23	0	3	522	1206	687	833	0	0	99
XLOC_010210	TCONS_00070259	522	1014	95.367	518	24	0	5	522	616	99	824	0	0	99
XLOC_014379	TCONS_00012781	1895	2252	93.614	642	34	5	1219	1855	640	1	952	0	7	94
XLOC_014960	TCONS_00056330	804	1153	92.734	812	49	8	3	804	1044	233	1164	0	10	99
XLOC_014960	TCONS_00061891	804	1826	93.239	710	41	6	2	707	712	6	1038	0	7	88
XLOC_014960	TCONS_00012768	804	1020	96.625	563	18	1	1	562	264	826	933	0	1	91
XLOC_014960	TCONS_00012768	804	1020	94.152	171	9	1	635	804	825	995	259	2.89e-70	1	91
XLOC_015184	TCONS_00070181	461	1684	94.105	458	27	0	1	458	459	2	697	0	0	99
XLOC_021559	TCONS_00034502	283	578	96.429	56	2	0	225	280	332	277	93.5	1.05e-20	0	94
XLOC_021893	TCONS_00012768	661	1020	93.958	662	34	4	1	661	159	815	996	0	6	100
XLOC_021893	TCONS_00063402	661	1366	92.459	663	43	6	1	661	493	1150	941	0	7	100
XLOC_021893	TCONS_00061891	661	1826	92.018	664	44	7	1	661	819	162	924	0	9	100
XLOC_021893	TCONS_00056330	661	1153	93.387	620	34	5	49	661	1108	489	911	0	7	93
XLOC_021893	TCONS_00012781	661	2252	90.95	663	53	6	1	661	758	1415	885	0	7	100
XLOC_022182	TCONS_00037517	346	1472	93.084	347	21	2	1	346	548	892	505	1.4e-144	3	100
XLOC_022182	TCONS_00070259	346	1014	95.425	306	11	2	42	346	1	304	484	1.83e-138	3	88
XLOC_022182	TCONS_00081788	346	2728	90.411	292	23	4	51	340	1419	1707	379	8.88e-107	5	84
XLOC_022257	TCONS_00046514	454	4144	91.41	454	39	0	1	454	2939	2486	623	4.94e-180	0	100
XLOC_022316	TCONS_00063392	250	683	96	250	10	0	1	250	307	58	407	2.89e-115	0	100
XLOC_022316	TCONS_00012731	250	807	95.565	248	10	1	1	248	555	309	396	6.26e-112	1	99
XLOC_022402	TCONS_00070259	239	1014	99.163	239	2	0	1	239	510	272	431	1.63e-122	0	100
XLOC_022402	TCONS_00037517	239	1472	97.908	239	5	0	1	239	1098	860	414	1.65e-117	0	100
XLOC_022402	TCONS_00082174	239	1059	94.444	216	11	1	24	239	1018	804	331	1.71e-92	1	90
XLOC_022402	TCONS_00081788	239	2728	90.456	241	21	2	1	239	1921	1681	316	4.78e-88	2	100
XLOC_022402	TCONS_00063441	239	936	90.417	240	22	1	1	239	440	201	315	1.72e-87	1	100
XLOC_022637	TCONS_00070259	520	1014	95.736	516	18	4	7	520	516	3	828	0	4	99
XLOC_022637	TCONS_00037517	520	1472	94.242	521	26	4	2	520	1109	591	793	0	4	99
XLOC_022637	TCONS_00081788	520	2728	90	510	46	5	7	512	1927	1419	654	0	5	97
XLOC_022800	TCONS_00070181	327	1684	96.024	327	12	1	1	327	264	589	531	2.18e-152	1	100
XLOC_022800	TCONS_00077784	327	1077	90.09	333	27	2	1	327	584	916	427	2.94e-121	6	100
XLOC_022809	TCONS_00028503	346	436	93.919	296	18	0	51	346	436	141	448	2.4e-127	0	86
XLOC_022880	TCONS_00070134	684	2956	93.169	688	39	3	1	684	1252	569	1003	0	8	100
XLOC_022880	TCONS_00063399	684	4686	92.764	691	34	10	3	684	3162	3845	985	0	16	99
XLOC_023061	TCONS_00056362	279	1829	91.166	283	20	3	1	278	819	1101	379	7.06e-107	5	99
XLOC_023133	TCONS_00037517	1022	1472	90.85	929	53	21	120	1022	332	1254	1216	0	32	88
XLOC_028871	TCONS_00061891	906	1826	94.581	775	33	9	137	906	380	1150	1190	0	9	85
XLOC_028871	TCONS_00070259	906	1014	93.994	666	29	8	1	661	281	940	998	0	11	81
XLOC_028871	TCONS_00070259	906	1014	90.667	75	7	0	699	773	940	1014	100	2.09e-22	0	81
XLOC_029124	TCONS_00056362	929	1829	91.093	842	71	4	1	839	301	1141	1136	0	4	90
XLOC_029159	TCONS_00037517	690	1472	91.024	713	38	12	2	690	389	1099	939	0	26	99
XLOC_029458	TCONS_00063388	369	1057	90.86	372	28	6	1	369	519	151	494	3.25e-141	6	100
XLOC_029697	TCONS_00084197	226	1052	92.92	226	13	3	1	226	625	847	326	7.47e-91	3	100
XLOC_029697	TCONS_00012781	226	2252	91.593	226	14	4	1	226	557	777	307	2.71e-85	5	100
XLOC_029697	TCONS_00011516	226	599	91.266	229	10	6	1	226	426	205	303	3.5e-84	10	100
XLOC_029697	TCONS_00063574	226	729	91.364	220	15	4	6	224	567	351	298	1.63e-82	4	97
XLOC_029697	TCONS_00070259	226	1014	93.478	184	9	3	43	226	1014	834	270	3.55e-74	3	81
XLOC_029700	TCONS_00070259	354	1014	96.591	352	11	1	3	354	585	235	582	6.46e-168	1	99
XLOC_029700	TCONS_00037517	354	1472	95.493	355	13	3	1	354	1175	823	564	2.34e-162	3	100
XLOC_029700	TCONS_00082174	354	1059	91.065	291	23	3	63	351	1059	770	390	4.2e-110	3	82
XLOC_029700	TCONS_00063441	354	936	90.459	283	26	1	73	354	446	164	372	1.52e-104	1	80
XLOC_029991	TCONS_00070259	354	1014	96.328	354	13	0	1	354	399	46	582	6.46e-168	0	100
XLOC_029991	TCONS_00037517	354	1472	95.739	352	15	0	3	354	985	634	568	1.81e-163	0	99
XLOC_029991	TCONS_00082174	354	1059	91.989	362	16	7	4	354	928	569	496	8.65e-142	13	99
XLOC_029991	TCONS_00081788	354	2728	91.243	354	30	1	1	354	1808	1456	481	2.42e-137	1	100
XLOC_030025	TCONS_00070259	716	1014	96.761	710	23	0	1	710	99	808	1184	0	0	99
XLOC_030025	TCONS_00037517	716	1472	96.338	710	25	1	1	710	687	1395	1166	0	1	99
XLOC_030071	TCONS_00070259	534	1014	94.579	535	27	2	1	534	655	122	826	0	2	100
XLOC_030071	TCONS_00037517	534	1472	94.216	536	27	4	1	534	1243	710	815	0	4	100
XLOC_030121	TCONS_00070134	907	2956	93.187	910	55	5	1	907	555	1460	1330	0	7	100
XLOC_030121	TCONS_00063399	907	4686	92.779	914	51	11	1	907	3859	2954	1308	0	15	100
XLOC_030141	TCONS_00028510	473	2057	96.203	474	13	3	1	473	545	76	771	0	5	100
XLOC_030141	TCONS_00028696	473	666	93.46	474	25	4	1	473	479	11	699	0	6	100
XLOC_030141	TCONS_00012737	473	1956	92.842	475	25	9	1	473	546	79	680	0	9	100
XLOC_030141	TCONS_00077757	473	574	91.339	381	26	7	1	380	375	1	514	3.24e-147	7	80
XLOC_030566	TCONS_00012781	1053	2252	95.829	1055	38	5	1	1052	556	1607	1700	0	6	99
XLOC_030566	TCONS_00063402	1053	1366	95.284	933	38	6	124	1052	412	1342	1474	0	6	99
XLOC_036086	TCONS_00037677	517	719	95.349	430	16	4	91	517	640	212	680	0	4	92
XLOC_036086	TCONS_00037677	517	719	94.667	75	3	1	42	116	719	646	115	4.21e-27	1	92
XLOC_036185	TCONS_00046424	747	715	100	686	0	0	62	747	1	686	1267	0	0	92
XLOC_036384	TCONS_00070259	353	1014	95.184	353	17	0	1	353	446	798	558	1.08e-160	0	100
XLOC_036384	TCONS_00037517	353	1472	94.618	353	18	1	1	353	1034	1385	545	8.45e-157	1	100
XLOC_036384	TCONS_00012781	353	2252	93.466	352	19	4	5	353	1163	813	520	5.12e-149	4	99
XLOC_036384	TCONS_00063402	353	1366	92.898	352	21	4	5	353	898	548	508	1.11e-145	4	99
XLOC_036384	TCONS_00063399	353	4686	92.33	352	23	4	5	353	4607	4257	497	2.4e-142	4	99
XLOC_036427	TCONS_00070259	312	1014	98.382	309	5	0	2	310	512	204	544	2.67e-156	0	99
XLOC_036427	TCONS_00037517	312	1472	96.463	311	11	0	2	312	1100	790	514	2.09e-147	0	99
XLOC_036427	TCONS_00081788	312	2728	90.032	311	29	2	2	310	1923	1613	401	1.7e-113	2	99
XLOC_036427	TCONS_00063441	312	936	91.986	287	22	1	27	312	417	131	401	1.7e-113	1	92
XLOC_036801	TCONS_00046514	444	4144	90.703	441	41	0	4	444	2458	2898	588	1.76e-169	0	99
XLOC_036819	TCONS_00012737	210	1956	93.333	210	12	2	1	210	760	967	309	6.94e-86	2	100
XLOC_036819	TCONS_00028510	210	2057	90.952	210	18	1	1	210	752	960	281	1.51e-77	1	100
XLOC_036968	TCONS_00070259	533	1014	91.083	471	33	7	69	533	813	346	628	0	9	87
XLOC_036968	TCONS_00037517	533	1472	90.929	463	33	7	75	531	1395	936	614	3.51e-177	9	86
XLOC_037532	TCONS_00028510	300	2057	98.02	303	3	2	1	300	569	267	523	3.33e-150	3	100
XLOC_037532	TCONS_00012737	300	1956	97.01	301	8	1	1	300	569	269	505	1.21e-144	1	100
XLOC_037532	TCONS_00028696	300	666	96.346	301	10	1	1	300	502	202	494	2.61e-141	1	100
XLOC_037532	TCONS_00077757	300	574	94	300	17	1	1	300	397	99	453	4.43e-129	1	100
XLOC_037739	TCONS_00070181	409	1684	94.866	409	21	0	1	409	1155	747	640	0	0	100
XLOC_037869	TCONS_00056362	314	1829	92.157	306	16	3	1	305	1440	1142	425	1.01e-120	8	97
XLOC_037945	TCONS_00084225	362	1686	96.739	92	2	1	272	362	830	739	152	2.21e-38	1	100
XLOC_040220	TCONS_00082174	269	1059	93.962	265	11	4	5	269	314	573	396	6.74e-112	5	99
XLOC_040220	TCONS_00037517	269	1472	94.51	255	10	3	1	255	374	624	390	3.13e-110	4	95
XLOC_040220	GRMZM2G156376_T01	269	1569	91.882	271	17	4	1	269	753	1020	374	3.16e-105	5	100
XLOC_040220	TCONS_00037200	269	916	90.842	273	13	6	5	269	454	722	355	1.14e-99	12	99
XLOC_040220	TCONS_00056330	269	1153	90.335	269	21	4	1	268	69	333	348	1.91e-97	5	99
XLOC_044042	TCONS_00070181	475	1684	94.737	475	24	1	1	475	958	485	737	0	1	100
XLOC_044462	TCONS_00012767	568	2175	90.351	570	53	2	1	568	985	416	747	0	2	100
XLOC_044586	TCONS_00077784	478	1077	90.737	475	43	1	1	475	180	653	632	0	1	99
XLOC_049753	TCONS_00012781	705	2252	94.901	706	34	2	1	705	389	1093	1103	0	2	100
XLOC_049753	TCONS_00011516	705	599	93.144	598	32	8	1	593	594	1	869	0	9	84
XLOC_049753	TCONS_00084197	705	1052	93.892	573	32	2	24	593	480	1052	861	0	3	81
XLOC_049826	TCONS_00070259	459	1014	92.826	460	26	5	1	459	922	469	660	0	7	100
XLOC_049826	TCONS_00012781	459	2252	90.281	463	35	8	1	459	689	1145	597	3.03e-172	10	100
XLOC_049826	TCONS_00063402	459	1366	90.043	462	38	6	1	459	424	880	592	1.41e-170	8	100
XLOC_049943	TCONS_00046446	473	1178	92.178	473	37	0	1	473	316	788	669	0	0	100
XLOC_050028	TCONS_00012781	579	2252	91.412	524	34	10	1	515	524	3	708	0	11	89
XLOC_050064	TCONS_00070259	451	1014	95.565	451	18	1	1	451	459	11	721	0	2	100
XLOC_050064	TCONS_00037517	451	1472	95.565	451	18	1	1	451	1047	599	721	0	2	100
XLOC_050064	TCONS_00081788	451	2728	91.759	449	33	3	4	451	1865	1420	621	1.76e-179	4	99
XLOC_050222	TCONS_00012781	636	2252	93.663	647	27	5	1	636	848	205	955	0	14	100
XLOC_050222	TCONS_00063399	636	4686	90.538	465	33	9	177	636	4069	3611	604	2.53e-174	11	99
XLOC_050222	TCONS_00063399	636	4686	93.605	172	11	0	1	172	4292	4121	257	8.16e-70	0	99
XLOC_050466	TCONS_00070259	650	1014	94	600	28	6	1	596	218	813	902	0	8	92
XLOC_050466	TCONS_00037517	650	1472	93.277	595	30	8	1	590	806	1395	869	0	10	91
XLOC_050772	TCONS_00046525	384	515	91.667	312	20	4	74	384	1	307	427	3.49e-121	6	81
XLOC_050986	TCONS_00037677	561	719	90.871	482	19	11	1	458	239	719	623	6.16e-180	25	82
XLOC_050992	GRMZM2G156376_T01	391	1569	92.945	326	22	1	7	332	1569	1245	473	4.5e-135	1	83
XLOC_055215	TCONS_00070259	381	1014	95.801	381	15	1	2	381	1011	631	614	2.47e-177	1	99
XLOC_055215	TCONS_00084197	381	1052	94.256	383	19	3	2	381	670	1052	582	6.98e-168	3	99
XLOC_055215	TCONS_00012768	381	1020	93.963	381	21	2	2	381	2	381	575	1.17e-165	2	99
XLOC_055215	TCONS_00012781	381	2252	93.717	382	22	2	2	381	600	981	571	1.51e-164	2	99
XLOC_055215	TCONS_00011516	381	599	91.667	384	25	7	2	381	381	1	525	1.19e-150	7	99
XLOC_055232	TCONS_00070259	309	1014	97.735	309	7	0	1	309	225	533	532	5.71e-153	0	100
XLOC_055232	TCONS_00037517	309	1472	96.117	309	12	0	1	309	813	1121	505	1.24e-144	0	100
XLOC_055232	TCONS_00082174	309	1059	91.409	291	22	3	14	302	770	1059	396	7.82e-112	3	94
XLOC_055239	TCONS_00056362	684	1829	91.813	684	56	0	1	684	26	709	953	0	0	100
XLOC_055483	TCONS_00026180	491	1697	92.494	453	25	3	1	450	1532	1086	640	0	9	92
XLOC_055615	TCONS_00017882	232	592	93.939	231	13	1	3	232	592	362	348	1.64e-97	1	99
XLOC_055615	TCONS_00063471	232	516	92.511	227	16	1	1	226	254	480	324	2.76e-90	1	97
XLOC_055615	TCONS_00084214	232	544	92.07	227	17	1	1	226	200	426	318	1.29e-88	1	97
XLOC_055615	TCONS_00046631	232	285	91.63	227	18	1	1	226	20	246	313	5.98e-87	1	97
XLOC_055792	TCONS_00037554	287	960	92.281	285	22	0	3	287	1	285	405	1.2e-114	0	99
XLOC_055821	TCONS_00070259	574	1014	94.867	526	24	3	1	524	530	6	819	0	3	91
XLOC_055821	TCONS_00037517	574	1472	93.536	526	31	3	1	524	1118	594	780	0	3	91
XLOC_055821	TCONS_00082174	574	1059	100	28	0	0	545	572	488	461	52.8	3.73e-08	0	95
XLOC_056149	TCONS_00070181	325	1684	95.385	325	14	1	1	325	325	648	516	6.07e-148	1	100
XLOC_056149	TCONS_00077784	325	1077	90.634	331	25	2	1	325	645	975	435	1.75e-123	6	100
XLOC_056253	TCONS_00028510	346	2057	95.858	338	11	3	1	336	375	39	544	2.97e-156	3	97
XLOC_056253	TCONS_00012737	346	1956	91.716	338	23	5	1	336	376	42	464	2.38e-132	5	97
XLOC_056253	TCONS_00028696	346	666	93.226	310	19	2	1	309	309	1	455	1.43e-129	2	89
XLOC_056326	TCONS_00018601	378	781	91.099	382	27	7	1	378	107	485	510	3.31e-146	7	100
XLOC_056326	TCONS_00046607	378	641	90.634	363	28	6	18	378	2	360	477	3.36e-136	6	96
XLOC_056349	TCONS_00056362	533	1829	93.996	533	32	0	1	533	928	396	808	0	0	100
XLOC_056490	TCONS_00037470	495	1009	90	490	47	2	1	489	521	1009	632	0	2	99
XLOC_056490	TCONS_00063441	495	936	90.931	408	34	3	7	412	407	1	545	1.2e-156	3	82
XLOC_060925	TCONS_00028501	246	1420	95.305	213	10	0	34	246	1420	1208	339	1.05e-94	0	87
XLOC_060925	TCONS_00028501	246	1420	95.775	71	3	0	58	128	480	410	115	1.93e-27	0	87
XLOC_061162	TCONS_00028510	778	2057	91.614	787	50	13	1	778	786	7	1074	0	16	100
XLOC_061162	TCONS_00012737	778	1956	90.99	788	57	11	1	778	794	11	1050	0	14	100
XLOC_061162	TCONS_00028696	778	666	90.476	672	48	14	59	720	666	1	872	0	16	85
XLOC_061186	TCONS_00063389	441	995	91.111	360	30	1	84	441	1	360	486	6.56e-139	2	81
XLOC_061187	TCONS_00037517	421	1472	97.625	421	10	0	1	421	1123	703	723	0	0	100
XLOC_061187	TCONS_00070259	421	1014	96.675	421	14	0	1	421	535	115	701	0	0	100
XLOC_061187	TCONS_00081788	421	2728	90.842	404	34	3	20	421	1927	1525	538	1.7e-154	3	95
XLOC_061187	TCONS_00063441	421	936	90.828	338	30	1	12	348	454	117	451	2.28e-128	1	80
XLOC_061325	TCONS_00056330	549	1153	92.022	539	37	6	15	549	706	170	752	0	6	97
XLOC_061326	TCONS_00012768	406	1020	94.335	406	22	1	1	406	244	648	621	1.58e-179	1	100
XLOC_061326	TCONS_00056330	406	1153	93.431	411	21	3	2	406	1066	656	604	1.59e-174	6	99
XLOC_061326	TCONS_00061891	406	1826	92.892	408	24	4	1	406	733	329	588	1.6e-169	5	100
XLOC_061326	TCONS_00063402	406	1366	92.421	409	27	3	1	406	578	985	580	2.68e-167	4	100
XLOC_061326	TCONS_00012781	406	2252	91.932	409	29	3	1	406	843	1250	569	5.81e-164	4	100
XLOC_061476	TCONS_00032140	465	856	92.152	446	27	8	24	465	856	415	623	5.07e-180	8	95
XLOC_061508	TCONS_00070259	511	1014	93.969	514	25	4	1	511	281	791	773	0	6	100
XLOC_061508	TCONS_00037517	511	1472	93.01	515	28	6	1	511	869	1379	745	0	8	100
XLOC_061561	TCONS_00070259	613	1014	96.988	332	10	0	277	608	519	188	558	1.92e-160	0	82
XLOC_061564	TCONS_00037517	714	1472	91.057	738	38	16	1	714	1085	352	972	0	28	100
XLOC_061573	TCONS_00070134	513	2956	97.271	513	9	3	1	513	28	535	865	0	5	100
XLOC_061573	TCONS_00061891	513	1826	92.308	520	28	9	1	513	625	1139	728	0	12	100
XLOC_061573	TCONS_00063402	513	1366	91.363	521	32	10	1	513	685	170	701	0	13	100
XLOC_061573	TCONS_00063399	513	4686	91.363	521	32	10	1	513	4394	3879	701	0	13	100
XLOC_062059	TCONS_00061891	328	1826	92.771	332	16	7	1	328	731	1058	473	3.74e-135	8	100
XLOC_062059	TCONS_00063399	328	4686	91.239	331	17	10	1	324	4289	3964	440	3.79e-125	12	99
XLOC_062059	TCONS_00070134	328	2956	90.909	330	21	7	1	327	132	455	435	1.76e-123	9	99
XLOC_062059	TCONS_00063402	328	1366	90.937	331	18	10	1	324	580	255	435	1.76e-123	12	99
XLOC_062433	TCONS_00070181	1094	1684	91.324	1095	92	3	1	1094	1109	17	1493	0	3	100
XLOC_064197	TCONS_00070134	593	2956	92.509	574	32	2	30	593	1512	940	811	0	11	95
XLOC_064197	TCONS_00063399	593	4686	90.148	609	40	8	1	593	2873	3477	774	0	20	100
XLOC_066888	TCONS_00070259	908	1014	92.761	815	45	12	28	835	813	6	1166	0	14	89
XLOC_066888	TCONS_00037517	908	1472	90.144	903	53	24	34	908	1395	501	1142	0	36	96
XLOC_066903	TCONS_00063389	399	995	91.718	326	25	1	2	325	326	1	451	2.16e-128	2	81
XLOC_066944	TCONS_00070259	419	1014	96.429	420	14	1	1	419	591	172	691	0	1	100
XLOC_066944	TCONS_00037517	419	1472	95.238	420	19	1	1	419	1179	760	664	0	1	100
XLOC_066944	TCONS_00063441	419	936	90.448	335	31	1	71	404	451	117	440	4.91e-125	1	80
XLOC_066992	TCONS_00037517	641	1472	94.081	642	31	6	1	641	985	350	968	0	7	100
XLOC_066992	TCONS_00082174	641	1059	91.398	651	37	13	2	641	928	286	874	0	19	99
XLOC_067072	TCONS_00070259	579	1014	95.164	517	22	3	64	579	2	516	813	0	3	89
XLOC_067072	TCONS_00037517	579	1472	90.833	600	33	10	1	579	506	1104	784	0	22	100
XLOC_067321	TCONS_00056330	452	1153	92.56	457	29	4	1	452	748	292	651	0	5	100
XLOC_067321	TCONS_00061891	452	1826	93.976	415	22	3	1	414	418	6	625	1.37e-180	3	92
XLOC_067321	TCONS_00012768	452	1020	98.141	269	5	0	1	269	558	826	470	6.78e-134	0	84
XLOC_067321	TCONS_00012768	452	1020	95.536	112	4	1	342	452	825	936	178	4.6e-46	1	84
XLOC_067331	TCONS_00070181	431	1684	92.575	431	31	1	1	431	470	899	617	2.18e-178	1	100
XLOC_008293	TCONS_00056362	299	1829	92.359	301	18	3	3	299	1055	756	424	3.46e-120	5	99
XLOC_008848	TCONS_00070181	483	1684	94.118	476	28	0	3	478	477	2	725	0	0	99
XLOC_008849	TCONS_00056362	525	1829	93.321	524	35	0	2	525	1017	494	774	0	0	99
XLOC_009792	TCONS_00046446	623	1178	94.366	497	27	1	127	623	1178	683	761	0	1	80
XLOC_010141	TCONS_00028500	307	372	99.349	307	2	0	1	307	21	327	556	3.36e-160	0	100
XLOC_010302	TCONS_00046446	315	1178	95.455	308	13	1	8	315	790	1096	490	3.56e-140	1	98
XLOC_010600	TCONS_00070181	782	1684	94.885	782	39	1	1	782	1035	255	1221	0	1	100
XLOC_014169	TCONS_00056362	521	1829	93.282	521	35	0	1	521	885	365	769	0	0	100
XLOC_014996	TCONS_00028501	460	1420	92.473	93	7	0	96	188	1407	1315	134	1.03e-32	0	98
XLOC_014996	TCONS_00028501	460	1420	95.775	71	3	0	107	177	480	410	115	3.73e-27	0	98
XLOC_015375	TCONS_00046446	665	1178	92.47	664	50	0	2	665	955	292	950	0	0	99
XLOC_021932	TCONS_00070181	410	1684	93.415	410	27	0	1	410	832	1241	608	1.24e-175	0	100
XLOC_022702	TCONS_00056362	639	1829	92.465	637	48	0	1	637	209	845	911	0	0	99
XLOC_022702	TCONS_00046514	639	4144	90.297	639	57	1	1	639	2788	3421	832	0	5	100
XLOC_023518	TCONS_00046446	657	1178	92.353	510	39	0	1	510	204	713	726	0	0	100
XLOC_023518	TCONS_00046446	657	1178	96.732	153	5	0	505	657	833	985	255	3.04e-69	0	100
XLOC_029664	TCONS_00046446	411	1178	92.701	411	30	0	1	411	600	1010	593	3.49e-171	0	100
XLOC_029729	TCONS_00046446	321	1178	94.062	320	19	0	2	321	469	788	486	4.7e-139	0	99
XLOC_029817	TCONS_00046514	667	4144	90.075	665	66	0	3	667	2512	3176	863	0	0	99
XLOC_029817	TCONS_00056362	667	1829	91.457	597	51	0	71	667	1	597	821	0	0	90
XLOC_030671	TCONS_00056362	559	1829	92.665	559	41	0	1	559	711	153	806	0	0	100
XLOC_030671	TCONS_00046514	559	4144	90.364	550	53	0	10	559	3281	2732	723	0	0	98
XLOC_036125	TCONS_00056362	277	1829	93.478	276	18	0	2	277	855	580	411	2.48e-116	0	99
XLOC_036182	TCONS_00046446	302	1178	94.853	272	14	0	7	278	272	1	425	9.73e-121	0	90
XLOC_036650	TCONS_00056362	321	1829	91.223	319	28	0	1	319	647	329	435	1.72e-123	0	99
XLOC_037927	TCONS_00056362	1103	1829	92.3	1026	77	2	62	1086	1	1025	1456	0	2	93
XLOC_043724	TCONS_00056362	983	1829	92.952	979	69	0	3	981	1055	77	1426	0	0	99
XLOC_043872	TCONS_00056362	499	1829	93.145	496	34	0	4	499	845	350	728	0	0	99
XLOC_044137	TCONS_00070181	458	1684	94.286	455	23	3	1	452	813	1267	693	0	3	99
XLOC_044285	TCONS_00070181	360	1684	94.167	360	21	0	1	360	59	418	549	6.67e-158	0	100
XLOC_044485	TCONS_00046446	481	1178	92.324	482	36	1	1	481	833	352	684	0	1	100
XLOC_047561	TCONS_00012946	1129	1833	93.167	922	42	1	208	1129	1833	933	1334	0	21	82
XLOC_050013	TCONS_00046446	448	1178	91.964	448	36	0	1	448	846	399	628	0	0	100
XLOC_050428	TCONS_00012781	1386	2252	94.189	1394	57	15	1	1386	1865	488	2104	0	24	100
XLOC_050428	TCONS_00063402	1386	1366	93.312	957	51	11	247	1195	1363	412	1400	0	13	82
XLOC_050510	TCONS_00056362	916	1829	92.022	890	71	0	27	916	1	890	1251	0	0	97
XLOC_050565	TCONS_00046446	616	1178	93.964	497	30	0	1	497	497	1	752	0	0	81
XLOC_050848	TCONS_00070181	470	1684	90.446	471	43	2	1	470	1181	1650	619	6.63e-179	2	100
XLOC_052635	TCONS_00056362	363	1829	92.011	363	29	0	1	363	585	223	510	3.17e-146	0	100
XLOC_055125	TCONS_00056362	433	1829	92.379	433	33	0	1	433	639	207	617	2.19e-178	0	100
XLOC_055125	TCONS_00046514	433	4144	90.951	431	39	0	1	431	3218	2788	580	2.87e-167	0	99
XLOC_055155	TCONS_00056362	439	1829	92.938	439	31	0	1	439	129	567	640	0	0	100
XLOC_055155	TCONS_00046514	439	4144	90.138	436	43	0	1	436	2708	3143	568	2.27e-163	0	99
XLOC_056227	TCONS_00046446	439	1178	93.578	436	28	0	2	437	631	1066	651	0	0	99
XLOC_062279	TCONS_00077784	275	1077	90.545	275	26	0	1	275	49	323	364	1.95e-102	0	100
XLOC_067254	TCONS_00056362	484	1829	92.437	476	35	1	10	484	1080	605	678	0	1	98
XLOC_067570	TCONS_00046446	462	1178	94.589	462	24	1	1	462	1074	614	713	0	1	100
