# Supplementary material for: Transcriptome Analysis of Tolerant and Susceptible Maize Genotypes Reveals Novel Insights about the Molecular Mechanisms Underlying Drought Responses in Leaves
Source: Int J Mol Sci. 2021 Jun 29;22(13):6980. doi: 10.3390/ijms22136980 (PMC8268334; doi:10.3390/ijms22136980)
Supplement: Supplementary file 1 [file ijms-22-06980-s001.zip › Supplementary Tables/Table S3.xlsx]

## Sheet: Table S3
Table S3: 144 lncRNAs are homologous to known lncRNAs in maize
LncRNA_ID	Known_lncRNA [38]	Query_length	Subject_length	Percent_identity	Hit_length	mismatch	gapopen	qstart	qend	sstart	send	bitscore	evalue	gaps	qcovs
XLOC_008279	Z27kG1_13282	400	1422	94.164	377	20	2	18	394	1	375	573	2.18e-164	2	94
XLOC_008279	Z27kG1_10871	400	1971	92.839	391	25	3	1	391	284	671	564	1.31e-161	3	98
XLOC_008464	Z27kG1_15145	362	1563	95.055	364	15	2	1	362	441	803	569	2.54e-163	3	100
XLOC_008464	Z27kG1_05919	362	1758	90.331	362	25	8	4	362	602	956	466	3.42e-132	10	99
XLOC_008464	Z27kG1_18622	362	2615	90.055	362	27	8	4	362	1500	1855	460	1.59e-130	9	99
XLOC_008538	Z27kG1_21117	300	1335	90.244	287	17	11	8	288	834	1115	364	1.05e-101	11	94
XLOC_008546	Z27kG1_17341	383	1353	91.392	395	21	9	1	383	948	555	529	4.57e-151	13	100
XLOC_008546	Z27kG1_17341	383	1353	91.071	56	2	2	177	230	545	491	73.1	9.26e-14	3	100
XLOC_008546	Z27kG1_17341	383	1353	97.561	41	1	0	189	229	635	595	71.3	3.33e-13	0	100
XLOC_008546	Z27kG1_17341	383	1353	95.349	43	0	1	190	230	855	813	67.6	4.31e-12	2	100
XLOC_008546	Z27kG1_17341	383	1353	92.857	42	1	1	94	135	634	595	60.2	7.21e-10	2	100
XLOC_008546	Z27kG1_17341	383	1353	92.857	42	1	1	304	343	855	814	60.2	7.21e-10	2	100
XLOC_008546	Z27kG1_19002	383	2093	90.73	356	13	10	1	354	1700	1363	457	2.19e-129	20	92
XLOC_008546	Z27kG1_19002	383	2093	91.489	47	2	1	186	230	1611	1565	63.9	5.57e-11	2	92
XLOC_008546	Z27kG1_19002	383	2093	92.857	42	1	1	94	135	1413	1374	60.2	7.21e-10	2	92
XLOC_008546	Z27kG1_19002	383	2093	90.476	42	2	1	304	343	1607	1566	54.7	3.35e-08	2	92
XLOC_008546	Z27kG1_14861	383	1618	97.727	44	0	1	188	230	1112	1069	75	2.57e-14	1	100
XLOC_008546	Z27kG1_14861	383	1618	95.238	42	1	1	303	343	1111	1070	65.8	1.55e-11	1	100
XLOC_008546	Z27kG1_14861	383	1618	92.857	42	1	1	94	135	900	861	60.2	7.21e-10	2	100
XLOC_008546	Z27kG1_20623	383	2039	95.556	45	0	1	188	230	1478	1434	71.3	3.33e-13	2	100
XLOC_008546	Z27kG1_20623	383	2039	93.023	43	1	1	303	343	1477	1435	62.1	2e-10	2	100
XLOC_008688	Z27kG1_08654	510	1367	100	506	0	0	5	510	1	506	935	0	0	99
XLOC_008764	Z27kG1_03530	400	1562	98.196	388	7	0	1	388	388	1	678	0	0	97
XLOC_008764	Z27kG1_14967	400	1322	98.196	388	7	0	1	388	388	1	678	0	0	97
XLOC_008764	Z27kG1_14696	400	951	98.056	360	7	0	1	360	360	1	627	1.65e-180	0	90
XLOC_008766	Z27kG1_10871	721	1971	98.343	664	11	0	1	664	943	280	1166	0	0	92
XLOC_008766	Z27kG1_10871	721	1971	100	172	0	0	2	173	1113	942	318	2.08e-87	0	92
XLOC_008766	Z27kG1_10871	721	1971	99.422	173	1	0	1	173	1057	885	315	2.69e-86	0	92
XLOC_008766	Z27kG1_10871	721	1971	98.844	173	2	0	1	173	1000	828	309	1.25e-84	0	92
XLOC_008766	Z27kG1_10871	721	1971	96.774	155	4	1	20	173	1153	999	257	4.59e-69	1	92
XLOC_008766	Z27kG1_10871	721	1971	99.138	116	1	0	1	116	886	771	209	1.3e-54	0	92
XLOC_008766	Z27kG1_10871	721	1971	100	59	0	0	1	59	829	771	110	1.36e-24	0	92
XLOC_008766	Z27kG1_13282	721	1422	98.602	644	8	1	1	643	644	1	1138	0	1	89
XLOC_008766	Z27kG1_13282	721	1422	97.701	174	3	1	1	173	702	529	298	2.71e-81	1	89
XLOC_008766	Z27kG1_13282	721	1422	94.872	156	6	2	20	173	741	586	243	1.29e-64	2	89
XLOC_008766	Z27kG1_13282	721	1422	100	116	0	0	1	116	587	472	215	2.8e-56	0	89
XLOC_008766	Z27kG1_13282	721	1422	100	59	0	0	1	59	530	472	110	1.36e-24	0	89
XLOC_008769	Z27kG1_10871	510	1971	96.436	505	18	0	6	510	1487	983	833	0	0	99
XLOC_008769	Z27kG1_10871	510	1971	93.878	98	5	1	340	437	867	771	147	7.26e-36	1	99
XLOC_008769	Z27kG1_13282	510	1422	95.117	512	23	2	1	510	1081	570	806	0	2	100
XLOC_008769	Z27kG1_13282	510	1422	90.558	233	19	2	281	510	745	513	305	1.13e-83	3	100
XLOC_008841	Z27kG1_15975	260	1618	94.979	239	12	0	2	240	1096	858	375	4.18e-105	0	92
XLOC_008880	Z27kG1_17460	255	1430	95.294	255	11	1	1	255	1224	971	403	1.88e-113	1	100
XLOC_008913	Z27kG1_22759	449	1671	98.886	449	5	0	1	449	1262	814	802	0	0	100
XLOC_008913	Z27kG1_08827	449	1675	97.55	449	11	0	1	449	1266	818	769	0	0	100
XLOC_008948	Z27kG1_22759	335	1671	96.418	335	10	2	1	335	1150	1482	551	8.46e-158	2	100
XLOC_008948	Z27kG1_08827	335	1675	95.224	335	14	2	1	335	1154	1486	529	3.96e-151	2	100
XLOC_008975	Z27kG1_17460	247	1430	93.927	247	14	1	1	247	944	1189	372	5.11e-104	1	100
XLOC_009001	Z27kG1_10871	702	1971	96.724	702	20	2	1	702	982	284	1166	0	3	100
XLOC_009001	Z27kG1_10871	702	1971	99.528	212	1	0	1	212	1096	885	387	5.46e-108	0	100
XLOC_009001	Z27kG1_10871	702	1971	99.057	212	2	0	1	212	1039	828	381	2.54e-106	0	100
XLOC_009001	Z27kG1_10871	702	1971	97.642	212	4	1	2	212	1153	942	363	9.2e-101	1	100
XLOC_009001	Z27kG1_10871	702	1971	98.71	155	2	0	1	155	925	771	276	1.23e-74	0	100
XLOC_009001	Z27kG1_10871	702	1971	96.774	155	4	1	59	212	1153	999	257	4.47e-69	1	100
XLOC_009001	Z27kG1_10871	702	1971	98.98	98	1	0	1	98	868	771	176	1.29e-44	0	100
XLOC_009001	Z27kG1_10871	702	1971	100	41	0	0	1	41	811	771	76.8	1.34e-14	0	100
XLOC_009001	Z27kG1_13282	702	1422	97.376	686	15	2	1	685	684	1	1164	0	3	98
XLOC_009001	Z27kG1_13282	702	1422	96.244	213	6	2	2	212	741	529	348	2.58e-96	2	98
XLOC_009001	Z27kG1_13282	702	1422	100	155	0	0	1	155	626	472	287	5.7e-78	0	98
XLOC_009001	Z27kG1_13282	702	1422	100	98	0	0	1	98	569	472	182	2.77e-46	0	98
XLOC_009001	Z27kG1_13282	702	1422	100	41	0	0	1	41	512	472	76.8	1.34e-14	0	98
XLOC_009123	Z27kG1_22419	233	2127	96.121	232	9	0	1	232	1726	1957	379	2.87e-106	0	99
XLOC_009123	Z27kG1_05288	233	1649	90.995	211	15	2	27	233	1297	1507	281	8.32e-77	4	89
XLOC_009123	Z27kG1_14696	233	951	90.995	211	15	2	27	233	602	812	281	8.32e-77	4	89
XLOC_009123	Z27kG1_14967	233	1322	90.995	211	15	2	27	233	1020	1230	281	8.32e-77	4	89
XLOC_009123	Z27kG1_03530	233	1562	90.521	211	16	2	27	233	1217	1427	276	3.87e-75	4	89
XLOC_009314	Z27kG1_13282	542	1422	93.542	542	33	2	1	540	1411	870	806	0	2	99
XLOC_009314	Z27kG1_10871	542	1971	92.593	540	39	1	1	539	1821	1282	774	0	1	99
XLOC_009379	Z27kG1_19002	619	2093	92	575	36	10	37	607	2093	1525	798	0	10	92
XLOC_009379	Z27kG1_19002	619	2093	95.122	41	0	1	528	568	1508	1470	63.9	9.2e-11	2	92
XLOC_009379	Z27kG1_19002	619	2093	94.737	38	0	1	529	566	1409	1374	58.4	4.28e-09	2	92
XLOC_009379	Z27kG1_17341	619	1353	94.737	38	0	1	529	566	630	595	58.4	4.28e-09	2	92
XLOC_009379	Z27kG1_22910	619	1689	94.737	38	0	1	529	566	988	953	58.4	4.28e-09	2	95
XLOC_009530	Z27kG1_13282	533	1422	95.14	535	21	5	1	532	183	715	839	0	5	100
XLOC_009530	Z27kG1_13282	533	1422	98.925	186	1	1	348	532	472	657	331	1.96e-91	1	100
XLOC_009530	Z27kG1_13282	533	1422	95.215	209	7	3	295	501	534	741	327	2.53e-90	3	100
XLOC_009530	Z27kG1_13282	533	1422	98.45	129	2	0	405	533	472	600	228	2.64e-60	0	100
XLOC_009530	Z27kG1_13282	533	1422	98.611	72	1	0	462	533	472	543	128	2.75e-30	0	100
XLOC_009530	Z27kG1_10871	533	1971	94.757	534	25	3	1	533	482	1013	828	0	3	100
XLOC_009530	Z27kG1_10871	533	1971	97.908	239	4	1	295	533	833	1070	412	6.79e-116	1	100
XLOC_009530	Z27kG1_10871	533	1971	97.908	239	3	2	295	532	890	1127	412	6.79e-116	2	100
XLOC_009530	Z27kG1_10871	533	1971	96.635	208	5	2	295	501	947	1153	344	2.51e-95	2	100
XLOC_009530	Z27kG1_10871	533	1971	97.849	186	4	0	348	533	771	956	322	1.18e-88	0	100
XLOC_009530	Z27kG1_10871	533	1971	97.674	129	3	0	405	533	771	899	222	1.23e-58	0	100
XLOC_009530	Z27kG1_10871	533	1971	93.617	94	4	2	295	387	1061	1153	139	1.27e-33	2	100
XLOC_009530	Z27kG1_10871	533	1971	98.592	71	1	0	462	532	771	841	126	9.91e-30	0	100
XLOC_009596	Z27kG1_04834	421	1223	100	28	0	0	356	383	634	607	52.8	1.33e-07	0	91
XLOC_009690	Z27kG1_04834	426	1223	100	28	0	0	39	66	607	634	52.8	1.35e-07	0	91
XLOC_009737	Z27kG1_18622	670	2615	97.019	671	19	1	1	670	1724	2394	1127	0	1	100
XLOC_009737	Z27kG1_20079	670	1414	96.721	671	20	2	1	670	524	1193	1116	0	2	100
XLOC_009737	Z27kG1_05919	670	1758	95.976	671	19	6	1	670	827	1490	1083	0	8	100
XLOC_009737	Z27kG1_22169	670	1529	92.444	675	40	10	1	670	640	1308	953	0	11	100
XLOC_009737	Z27kG1_12783	670	1797	96.78	528	16	1	144	670	1037	1564	880	0	1	100
XLOC_009737	Z27kG1_12783	670	1797	97.98	198	3	1	1	198	789	985	342	1.14e-94	1	100
XLOC_009859	Z27kG1_20063	463	1612	93.473	429	24	2	1	429	1158	734	634	0	4	93
XLOC_010175	Z27kG1_13282	631	1422	94.896	627	28	4	6	631	1	624	977	0	4	99
XLOC_010175	Z27kG1_13282	631	1422	96	150	4	2	483	631	534	682	243	1.12e-64	2	99
XLOC_010175	Z27kG1_13282	631	1422	94.702	151	5	3	483	631	591	740	231	2.43e-61	3	99
XLOC_010175	Z27kG1_13282	631	1422	96.875	96	3	0	536	631	472	567	161	3.24e-40	0	99
XLOC_010175	Z27kG1_10871	631	1971	93.987	632	33	5	1	631	296	923	952	0	5	100
XLOC_010175	Z27kG1_10871	631	1971	97.315	149	3	1	483	631	947	1094	252	1.87e-67	1	100
XLOC_010175	Z27kG1_10871	631	1971	96.644	149	4	1	483	631	890	1037	246	8.68e-66	1	100
XLOC_010175	Z27kG1_10871	631	1971	95.973	149	5	1	483	631	833	980	241	4.04e-64	1	100
XLOC_010175	Z27kG1_10871	631	1971	95.333	150	5	2	483	631	1004	1152	237	5.23e-63	2	100
XLOC_010175	Z27kG1_10871	631	1971	95.833	96	4	0	536	631	771	866	156	1.51e-38	0	100
XLOC_010175	Z27kG1_10871	631	1971	94.681	94	3	2	483	575	1061	1153	145	3.26e-35	2	100
XLOC_010270	Z27kG1_10871	918	1971	97.712	918	20	1	1	918	1813	897	1578	0	1	100
XLOC_010270	Z27kG1_10871	918	1971	92.476	319	20	3	603	918	1157	840	453	7e-128	4	100
XLOC_010270	Z27kG1_10871	918	1971	92.089	316	22	2	605	918	1097	783	442	1.51e-124	3	100
XLOC_010270	Z27kG1_10871	918	1971	90.775	271	22	2	605	873	1040	771	359	1.57e-99	3	100
XLOC_010270	Z27kG1_10871	918	1971	90.875	263	18	5	658	918	1212	954	348	3.4e-96	6	100
XLOC_010270	Z27kG1_10871	918	1971	94.898	98	4	1	662	759	867	771	152	2.86e-37	1	100
XLOC_010270	Z27kG1_13282	918	1422	96.957	920	26	2	1	918	1403	484	1543	0	2	100
XLOC_010270	Z27kG1_13282	918	1422	92.701	274	17	2	603	873	745	472	392	1.55e-109	3	100
XLOC_010270	Z27kG1_13282	918	1422	90.152	264	19	6	658	918	800	541	337	7.35e-93	7	100
XLOC_010270	Z27kG1_13282	918	1422	90.233	215	17	3	605	816	685	472	278	4.52e-75	4	100
XLOC_010605	Z27kG1_10871	313	1971	97.771	314	6	1	1	313	813	1126	540	1.7e-154	1	100
XLOC_010605	Z27kG1_10871	313	1971	98.658	298	4	0	16	313	771	1068	529	3.69e-151	0	100
XLOC_010605	Z27kG1_10871	313	1971	97.183	284	7	1	1	283	870	1153	479	3.76e-136	1	100
XLOC_010605	Z27kG1_10871	313	1971	98.34	241	4	0	73	313	771	1011	424	1.79e-119	0	100
XLOC_010605	Z27kG1_10871	313	1971	91.608	286	21	2	1	285	927	1210	392	5.05e-110	3	100
XLOC_010605	Z27kG1_10871	313	1971	97.826	184	4	0	130	313	771	954	318	8.68e-88	0	100
XLOC_010605	Z27kG1_10871	313	1971	90.393	229	19	2	1	228	984	1210	298	1.13e-81	3	100
XLOC_010605	Z27kG1_10871	313	1971	98.425	127	2	0	187	313	771	897	224	1.95e-59	0	100
XLOC_010605	Z27kG1_10871	313	1971	100	70	0	0	244	313	771	840	130	4.37e-31	0	100
XLOC_010605	Z27kG1_13282	313	1422	97.037	270	6	2	16	283	472	741	453	2.28e-128	2	100
XLOC_010605	Z27kG1_13282	313	1422	96.708	243	6	2	73	313	472	714	403	2.33e-113	2	100
XLOC_010605	Z27kG1_13282	313	1422	91.638	287	20	3	1	285	514	798	394	1.4e-110	4	100
XLOC_010605	Z27kG1_13282	313	1422	97.838	185	3	1	130	313	472	656	318	8.68e-88	1	100
XLOC_010605	Z27kG1_13282	313	1422	99.213	127	1	0	187	313	472	598	230	4.19e-61	0	100
XLOC_010605	Z27kG1_13282	313	1422	100	70	0	0	244	313	472	541	130	4.37e-31	0	100
XLOC_010608	Z27kG1_06018	577	1162	95.498	311	10	2	271	577	1	311	494	2.56e-140	4	95
XLOC_010608	Z27kG1_06018	577	1162	98.76	242	3	0	1	242	921	1162	431	2.04e-121	0	95
XLOC_010608	Z27kG1_06018	577	1162	100	35	0	0	34	68	988	1022	65.8	2.38e-11	0	95
XLOC_010608	Z27kG1_06018	577	1162	97.143	35	1	0	68	102	954	988	60.2	1.11e-09	0	95
XLOC_010669	Z27kG1_05919	1175	1758	90.266	976	70	22	6	966	539	1504	1253	0	25	99
XLOC_010669	Z27kG1_05919	1175	1758	90.65	246	13	2	936	1175	1506	1747	318	3.43e-87	10	99
XLOC_010669	Z27kG1_12783	1175	1797	92.287	739	41	9	446	1175	1055	1786	1035	0	16	99
XLOC_011638	Z27kG1_22123	1430	1299	100	847	0	0	36	882	1	847	1565	0	0	91
XLOC_011638	Z27kG1_22123	1430	1299	100	453	0	0	976	1428	847	1299	837	0	0	91
XLOC_014256	Z27kG1_21117	911	1335	97.059	34	1	0	677	710	983	950	58.4	6.36e-09	0	90
XLOC_014389	Z27kG1_05919	492	1758	92.323	495	29	9	3	492	678	1168	695	0	9	99
XLOC_014389	Z27kG1_18622	492	2615	91.566	498	32	9	1	492	1574	2067	678	0	10	100
XLOC_014389	Z27kG1_20079	492	1414	91.165	498	30	10	1	492	377	866	664	0	14	100
XLOC_014532	Z27kG1_13282	362	1422	98	350	7	0	1	350	1073	1422	608	5.37e-175	0	97
XLOC_014532	Z27kG1_10871	362	1971	95.856	362	12	3	1	361	1484	1843	582	3.26e-167	3	99
XLOC_014600	Z27kG1_21974	406	1898	95.844	409	14	2	1	406	1189	1597	658	0	3	100
XLOC_014814	Z27kG1_10871	699	1971	93.617	141	7	2	561	699	1038	898	209	1.26e-54	2	100
XLOC_014845	Z27kG1_21663	270	2165	97.778	270	6	0	1	270	1237	1506	466	2.51e-132	0	100
XLOC_014855	Z27kG1_22759	285	1671	90.747	281	23	3	6	285	1049	1327	372	5.97e-104	3	98
XLOC_014855	Z27kG1_08827	285	1675	90.036	281	25	3	6	285	1053	1331	361	1.29e-100	3	98
XLOC_014972	Z27kG1_22759	529	1671	93.785	531	28	5	1	529	1059	1586	793	0	5	100
XLOC_014972	Z27kG1_08827	529	1675	92.817	529	34	4	1	528	1063	1588	763	0	4	99
XLOC_015022	Z27kG1_17460	432	1430	92.927	410	23	5	3	412	424	827	592	6.52e-170	6	95
XLOC_015022	Z27kG1_06872	432	1367	94.241	382	19	2	1	382	345	723	580	1.41e-166	3	88
XLOC_021761	Z27kG1_10871	755	1971	92.523	749	54	2	3	750	1222	1969	1072	0	2	99
XLOC_021761	Z27kG1_13282	755	1422	92.822	613	42	2	3	613	810	1422	887	0	2	81
XLOC_021842	Z27kG1_10871	414	1971	94.203	414	23	1	1	414	695	283	630	0	1	100
XLOC_021842	Z27kG1_13282	414	1422	94.458	397	20	2	1	396	396	1	610	1.72e-175	2	96
XLOC_021931	Z27kG1_12783	387	1797	97.158	387	9	2	1	387	562	946	652	0	2	100
XLOC_021931	Z27kG1_05919	387	1758	95.116	389	13	6	1	387	599	983	608	5.77e-175	6	100
XLOC_021931	Z27kG1_18622	387	2615	94.845	388	17	3	1	387	1497	1882	603	2.68e-173	3	100
XLOC_021931	Z27kG1_20079	387	1414	92.545	389	18	9	1	387	302	681	547	1.28e-156	11	100
XLOC_021931	Z27kG1_15145	387	1563	91.517	389	25	6	1	383	440	826	529	4.62e-151	8	99
XLOC_022023	Z27kG1_10871	663	1971	98.793	663	8	0	1	663	417	1079	1181	0	0	100
XLOC_022023	Z27kG1_10871	663	1971	97.419	310	7	1	355	663	828	1137	527	2.91e-150	1	100
XLOC_022023	Z27kG1_10871	663	1971	97.398	269	6	1	355	622	885	1153	457	3.88e-129	1	100
XLOC_022023	Z27kG1_10871	663	1971	99.206	252	2	0	412	663	771	1022	455	1.39e-128	0	100
XLOC_022023	Z27kG1_10871	663	1971	90.775	271	22	2	355	624	942	1210	359	1.13e-99	3	100
XLOC_022023	Z27kG1_10871	663	1971	98.974	195	2	0	469	663	771	965	350	6.77e-97	0	100
XLOC_022023	Z27kG1_10871	663	1971	98.551	138	2	0	526	663	771	908	244	3.29e-65	0	100
XLOC_022023	Z27kG1_10871	663	1971	98.765	81	1	0	583	663	771	851	145	3.43e-35	0	100
XLOC_022023	Z27kG1_13282	663	1422	97.28	625	14	3	1	622	117	741	1057	0	3	100
XLOC_022023	Z27kG1_13282	663	1422	96.85	254	6	2	412	663	472	725	424	3.93e-119	2	100
XLOC_022023	Z27kG1_13282	663	1422	90.074	272	23	3	355	624	529	798	350	6.77e-97	4	100
XLOC_022023	Z27kG1_13282	663	1422	97.959	196	3	1	469	663	472	667	339	1.47e-93	1	100
XLOC_022023	Z27kG1_13282	663	1422	100	138	0	0	526	663	472	609	255	1.52e-68	0	100
XLOC_022023	Z27kG1_13282	663	1422	100	81	0	0	583	663	472	552	150	7.37e-37	0	100
XLOC_022144	Z27kG1_10871	394	1971	96.212	396	13	2	1	394	1932	1537	647	0	2	100
XLOC_022144	Z27kG1_19462	394	1224	95.509	334	11	2	1	330	881	1214	531	1.31e-151	4	84
XLOC_022144	Z27kG1_09201	394	1418	90.566	318	21	7	68	382	1107	1418	412	4.95e-116	9	80
XLOC_022198	Z27kG1_22759	380	1671	94.005	367	19	3	1	366	1465	1101	553	2.69e-158	3	96
XLOC_022198	Z27kG1_08827	380	1675	93.716	366	22	1	1	366	1469	1105	547	1.25e-156	1	96
XLOC_022334	Z27kG1_07007	1260	1633	91.552	1018	68	11	1	1015	1220	218	1387	0	18	81
XLOC_022481	Z27kG1_19096	243	1392	94.66	206	10	1	1	206	1188	1392	318	6.64e-88	1	85
XLOC_022540	Z27kG1_10527	722	1103	96.677	662	21	1	62	722	1103	442	1099	0	1	92
XLOC_022691	Z27kG1_05919	444	1758	91.549	426	29	7	22	444	554	975	580	1.45e-166	7	95
XLOC_022691	Z27kG1_20079	444	1414	91.549	426	24	7	22	444	257	673	577	1.88e-165	12	95
XLOC_022691	Z27kG1_18622	444	2615	90.625	416	30	8	34	444	1463	1874	544	1.91e-155	9	93
XLOC_022691	Z27kG1_12783	444	1797	90	430	28	13	22	444	517	938	542	6.86e-155	15	95
XLOC_022726	Z27kG1_02232	414	1782	90.557	413	37	2	1	412	1384	973	545	4.93e-156	2	99
XLOC_022726	Z27kG1_10620	414	1180	90.557	413	37	2	1	412	782	371	545	4.93e-156	2	99
XLOC_022947	Z27kG1_10871	642	1971	95.659	645	24	3	1	642	1718	1075	1033	0	4	100
XLOC_022947	Z27kG1_13282	642	1422	92.736	647	41	5	1	642	1308	663	929	0	6	100
XLOC_023058	Z27kG1_14861	572	1618	98.776	572	7	0	1	572	1487	916	1018	0	0	100
XLOC_023058	Z27kG1_14861	572	1618	93.878	49	0	3	472	518	801	754	71.3	5.07e-13	3	100
XLOC_023058	Z27kG1_20623	572	2039	90.862	580	43	5	1	572	1858	1281	769	0	10	100
XLOC_023058	Z27kG1_22910	572	1689	95.238	42	1	1	377	418	993	953	65.8	2.36e-11	1	100
XLOC_023058	Z27kG1_17341	572	1353	97.778	45	0	1	472	515	534	490	76.8	1.09e-14	1	100
XLOC_023058	Z27kG1_17341	572	1353	95.238	42	1	1	377	418	635	595	65.8	2.36e-11	1	100
XLOC_023491	Z27kG1_21117	453	1335	90.196	459	33	11	1	453	428	880	588	8.87e-169	12	100
XLOC_028916	Z27kG1_06872	377	1367	93.684	380	17	7	1	377	142	517	562	4.43e-161	7	100
XLOC_028941	Z27kG1_21974	485	1898	95.492	488	19	1	1	485	1611	1124	776	0	3	100
XLOC_029081	Z27kG1_09028	635	1407	93.478	46	1	2	362	405	1032	987	67.6	7.3e-12	2	99
XLOC_029081	Z27kG1_19002	635	2093	95.745	47	0	1	577	623	1514	1470	75	4.36e-14	2	97
XLOC_029081	Z27kG1_19002	635	2093	97.561	41	1	0	478	518	1512	1472	71.3	5.65e-13	0	97
XLOC_029081	Z27kG1_19002	635	2093	91.489	47	2	2	361	405	1611	1565	63.9	9.45e-11	2	97
XLOC_029081	Z27kG1_19002	635	2093	92.857	42	1	1	269	310	1413	1374	60.2	1.22e-09	2	97
XLOC_029081	Z27kG1_19002	635	2093	90.476	42	2	1	479	518	1607	1566	54.7	5.69e-08	2	97
XLOC_029081	Z27kG1_08165	635	1226	97.778	45	0	1	579	623	775	732	76.8	1.21e-14	1	99
XLOC_029081	Z27kG1_08165	635	1226	92.857	42	1	1	269	310	643	604	60.2	1.22e-09	2	99
XLOC_029110	Z27kG1_17460	539	1430	91.897	543	39	3	1	539	803	262	754	0	5	100
XLOC_029252	Z27kG1_10871	429	1971	93.123	349	22	2	1	349	626	280	510	1.87e-145	2	81
XLOC_029463	Z27kG1_17606	1635	1332	99.925	1332	1	0	184	1515	1332	1	2455	0	0	81
XLOC_029468	Z27kG1_21530	675	1756	92.233	103	8	0	450	552	1418	1520	147	9.69e-36	0	82
XLOC_029485	Z27kG1_05919	509	1758	93.957	513	25	5	1	509	1105	595	771	0	6	100
XLOC_029485	Z27kG1_18622	509	2615	92.816	515	28	7	1	509	2004	1493	737	0	9	100
XLOC_029485	Z27kG1_20079	509	1414	92.412	514	26	10	1	509	803	298	721	0	13	100
XLOC_029485	Z27kG1_15145	509	1563	90.944	519	32	12	1	509	949	436	684	0	15	100
XLOC_029485	Z27kG1_12870	509	1494	90.522	517	39	10	1	509	867	353	675	0	10	100
XLOC_029598	Z27kG1_05919	659	1758	92.192	666	39	13	1	659	595	1254	929	0	13	100
XLOC_029598	Z27kG1_20079	659	1414	91.304	667	38	16	1	659	298	952	893	0	20	100
XLOC_029598	Z27kG1_18622	659	2615	91.154	667	45	13	1	659	1493	2153	893	0	14	100
XLOC_029684	Z27kG1_20079	672	1414	97.768	672	13	2	1	672	1206	537	1157	0	2	100
XLOC_029684	Z27kG1_18622	672	2615	96.28	672	24	1	1	672	2407	1737	1101	0	1	100
XLOC_029684	Z27kG1_05919	672	1758	94.643	672	28	6	1	672	1503	840	1035	0	8	100
XLOC_029684	Z27kG1_05919	672	1758	100	30	0	0	1	30	1535	1506	56.5	1.67e-08	0	100
XLOC_029684	Z27kG1_22169	672	1529	91.864	676	44	10	1	672	1321	653	933	0	11	100
XLOC_029684	Z27kG1_12783	672	1797	97.786	542	11	1	1	542	1577	1037	933	0	1	100
XLOC_029684	Z27kG1_12783	672	1797	96.237	186	5	2	487	672	985	802	303	5.41e-83	2	100
XLOC_029829	Z27kG1_22394	426	2087	90.714	420	35	4	6	422	1699	1281	556	2.34e-159	4	98
XLOC_029834	Z27kG1_19222	296	1225	100	276	0	0	21	296	1	276	510	1.26e-145	0	93
XLOC_030164	Z27kG1_19002	839	2093	97.561	41	1	0	655	695	1472	1512	71.3	7.51e-13	0	93
XLOC_030164	Z27kG1_19002	839	2093	90.476	42	2	1	655	694	1566	1607	54.7	7.56e-08	2	93
XLOC_030718	Z27kG1_10871	393	1971	99.237	393	3	0	1	393	1955	1563	710	0	0	100
XLOC_030718	Z27kG1_19462	393	1224	92.222	360	20	7	1	355	858	1214	503	2.85e-143	8	90
XLOC_030763	Z27kG1_22457	481	2840	100	481	0	0	1	481	1473	993	889	0	0	100
XLOC_035479	Z27kG1_16399	1176	1301	95.141	1173	50	5	1	1171	1238	71	1844	0	7	99
XLOC_035479	Z27kG1_16399	1176	1301	90.476	63	4	2	704	764	501	439	82.4	4.9e-16	2	99
XLOC_035479	Z27kG1_02793	1176	1315	90.87	1172	84	7	1	1171	1217	68	1550	0	23	99
XLOC_035479	Z27kG1_02793	1176	1315	93.651	63	2	2	704	764	496	434	93.5	2.26e-19	2	99
XLOC_035479	Z27kG1_19504	1176	2384	93.346	1052	60	6	1	1052	2213	1172	1546	0	10	99
XLOC_035479	Z27kG1_19504	1176	2384	92	125	8	2	1049	1171	198	74	174	7.85e-44	2	99
XLOC_035479	Z27kG1_19504	1176	2384	92.424	66	2	3	742	807	1515	1453	91.6	8.14e-19	3	99
XLOC_035479	Z27kG1_07155	1176	1236	90.72	1153	89	11	20	1165	1236	95	1520	0	18	97
XLOC_035479	Z27kG1_07155	1176	1236	90.625	64	3	3	742	805	553	493	82.4	4.9e-16	3	97
XLOC_036144	Z27kG1_13315	294	2030	98.625	291	3	1	5	294	781	1071	514	9.65e-147	1	99
XLOC_036144	Z27kG1_11863	294	1670	95.932	295	11	1	1	294	188	482	477	1.27e-135	1	100
XLOC_036360	Z27kG1_17153	829	1530	98.767	811	9	1	1	811	721	1530	1441	0	1	98
XLOC_036654	Z27kG1_10871	1451	1971	97.463	1025	26	0	427	1451	828	1852	1749	0	0	100
XLOC_036654	Z27kG1_10871	1451	1971	95.455	814	33	3	1	811	345	1157	1295	0	4	100
XLOC_036654	Z27kG1_10871	1451	1971	92.169	332	20	5	427	756	885	1212	464	5.15e-131	6	100
XLOC_036654	Z27kG1_10871	1451	1971	91.768	328	24	2	484	809	771	1097	453	1.12e-127	3	100
XLOC_036654	Z27kG1_10871	1451	1971	91.513	271	20	2	427	696	942	1210	370	1.16e-102	3	100
XLOC_036654	Z27kG1_10871	1451	1971	90.037	271	24	2	541	809	771	1040	348	5.42e-96	3	100
XLOC_036654	Z27kG1_13282	1451	1422	96.53	951	30	3	484	1431	472	1422	1570	0	3	99
XLOC_036654	Z27kG1_13282	1451	1422	94.868	760	31	7	1	756	45	800	1181	0	8	99
XLOC_036654	Z27kG1_13282	1451	1422	91.971	274	19	2	541	811	472	745	381	5.34e-106	3	99
XLOC_036654	Z27kG1_13282	1451	1422	90.074	272	23	3	427	696	529	798	350	1.51e-96	4	99
XLOC_036764	Z27kG1_07007	211	1633	94.286	210	12	0	2	211	1417	1626	322	4.4e-89	0	99
XLOC_036790	Z27kG1_10871	639	1971	92.958	639	44	1	1	638	1307	1945	929	0	1	99
XLOC_036790	Z27kG1_13282	639	1422	93.548	527	32	2	1	525	896	1422	784	0	2	82
XLOC_036803	Z27kG1_05919	852	1758	91.204	864	51	24	1	852	568	1418	1151	0	25	100
XLOC_036803	Z27kG1_18622	852	2615	90.972	864	56	21	1	852	1465	2318	1144	0	22	100
XLOC_036803	Z27kG1_20079	852	1414	90.244	861	61	21	1	852	271	1117	1103	0	23	100
XLOC_036902	Z27kG1_21530	640	1756	92.797	597	40	2	1	596	810	216	861	0	3	93
XLOC_036919	Z27kG1_22759	283	1671	91.166	283	24	1	1	283	1162	1443	383	2.74e-107	1	100
XLOC_036919	Z27kG1_08827	283	1675	90.141	284	25	3	1	283	1166	1447	366	2.76e-102	3	100
XLOC_037089	Z27kG1_10871	449	1971	92.873	449	32	0	1	449	1333	1781	652	0	0	100
XLOC_037089	Z27kG1_13282	449	1422	92.667	450	32	1	1	449	922	1371	647	0	1	100
XLOC_037118	Z27kG1_10871	574	1971	97.387	574	15	0	1	574	1963	1390	977	0	0	100
XLOC_037122	Z27kG1_17460	661	1430	95.764	661	21	5	1	661	1357	704	1059	0	7	100
XLOC_037308	Z27kG1_08337	566	1557	98.233	566	10	0	1	566	1163	598	990	0	0	100
XLOC_037503	Z27kG1_17460	457	1430	96.28	457	17	0	1	457	923	467	750	0	0	100
XLOC_037561	Z27kG1_10527	338	1103	97.633	338	8	0	1	338	608	945	580	1.09e-166	0	100
XLOC_037904	Z27kG1_08337	241	1557	95.763	236	9	1	6	241	168	402	379	2.98e-106	1	98
XLOC_038015	Z27kG1_13282	577	1422	90.538	539	43	8	40	571	472	1009	706	0	8	99
XLOC_038018	Z27kG1_10871	675	1971	97.781	631	14	0	45	675	280	910	1088	0	0	93
XLOC_038018	Z27kG1_10871	675	1971	100	140	0	0	536	675	942	1081	259	1.19e-69	0	93
XLOC_038018	Z27kG1_10871	675	1971	99.286	140	1	0	536	675	885	1024	254	5.55e-68	0	93
XLOC_038018	Z27kG1_10871	675	1971	98.571	140	2	0	536	675	828	967	248	2.58e-66	0	93
XLOC_038018	Z27kG1_10871	675	1971	96.454	141	4	1	536	675	999	1139	231	2.6e-61	1	93
XLOC_038018	Z27kG1_10871	675	1971	94.898	98	4	1	536	632	1056	1153	152	2.08e-37	1	93
XLOC_038018	Z27kG1_10871	675	1971	98.795	83	1	0	593	675	771	853	148	2.69e-36	0	93
XLOC_038018	Z27kG1_13282	675	1422	97.054	611	17	1	66	675	1	611	1027	0	1	90
XLOC_038018	Z27kG1_13282	675	1422	97.163	141	3	1	536	675	529	669	237	5.59e-63	1	90
XLOC_038018	Z27kG1_13282	675	1422	94.366	142	6	2	536	675	586	727	217	7.28e-57	2	90
XLOC_038018	Z27kG1_13282	675	1422	100	83	0	0	593	675	472	554	154	5.79e-38	0	90
XLOC_038018	Z27kG1_13282	675	1422	91.919	99	6	2	536	632	643	741	137	5.83e-33	2	90
XLOC_042206	Z27kG1_03528	367	1291	100	367	0	0	1	367	67	433	678	0	0	100
XLOC_042206	Z27kG1_03528	367	1291	98.131	107	2	0	136	242	96	202	187	3.03e-48	0	100
XLOC_042206	Z27kG1_03528	367	1291	98.131	107	2	0	30	136	202	308	187	3.03e-48	0	100
XLOC_043701	Z27kG1_12682	300	540	93.033	244	16	1	57	300	540	298	355	6.32e-99	1	81
XLOC_043839	Z27kG1_10871	641	1971	99.064	641	6	0	1	641	1303	1943	1151	0	0	100
XLOC_043839	Z27kG1_13282	641	1422	95.292	531	24	1	1	530	892	1422	841	0	1	83
XLOC_044304	Z27kG1_05259	345	1559	100	345	0	0	1	345	1055	1399	638	0	0	100
XLOC_044460	Z27kG1_11972	283	1440	100	240	0	0	10	249	240	1	444	1.24e-125	0	85
XLOC_044463	Z27kG1_19096	317	1392	91.195	318	23	5	1	317	1019	1332	427	1.4e-120	5	100
XLOC_044463	Z27kG1_20110	317	1200	91.724	290	21	3	11	298	912	1200	399	3.06e-112	3	91
XLOC_044639	Z27kG1_17460	986	1430	91.582	689	44	12	302	986	961	283	939	0	14	90
XLOC_044639	Z27kG1_17460	986	1430	92.718	206	10	3	2	206	1282	1081	292	1.74e-79	5	90
XLOC_044821	Z27kG1_18622	291	2615	97.938	291	6	0	1	291	1497	1787	505	5.77e-144	0	100
XLOC_044821	Z27kG1_05919	291	1758	94.863	292	12	3	1	291	599	888	453	2.12e-128	3	100
XLOC_044821	Z27kG1_12783	291	1797	93.174	293	15	5	1	291	562	851	425	4.62e-120	5	100
XLOC_044821	Z27kG1_20079	291	1414	90.102	293	19	9	1	291	302	586	372	6.11e-104	10	100
XLOC_044987	Z27kG1_13282	355	1422	90.986	355	30	2	1	353	629	983	477	1.55e-135	2	99
XLOC_044987	Z27kG1_10871	355	1971	97.297	111	3	0	1	111	928	1038	189	8.13e-49	0	99
XLOC_044987	Z27kG1_10871	355	1971	96.396	111	4	0	1	111	871	981	183	3.78e-47	0	99
XLOC_044987	Z27kG1_10871	355	1971	95.495	111	5	0	1	111	814	924	178	1.76e-45	0	99
XLOC_044987	Z27kG1_10871	355	1971	95.876	97	4	0	15	111	771	867	158	2.29e-39	0	99
XLOC_044993	Z27kG1_19002	486	2093	95.455	44	1	1	26	69	1374	1416	69.4	1.54e-12	1	99
XLOC_044993	Z27kG1_19002	486	2093	94.737	38	0	1	131	168	1374	1409	58.4	3.33e-09	2	99
XLOC_044993	Z27kG1_21663	486	2165	94.737	38	0	1	131	168	1582	1617	58.4	3.33e-09	2	93
XLOC_044993	Z27kG1_14861	486	1618	94.737	38	0	1	131	168	861	896	58.4	3.33e-09	2	100
XLOC_045014	Z27kG1_12783	267	1797	97.378	267	5	2	1	267	821	557	453	1.93e-128	2	100
XLOC_045014	Z27kG1_05919	267	1758	97.026	269	4	4	1	267	860	594	449	2.5e-127	4	100
XLOC_045014	Z27kG1_18622	267	2615	93.704	270	10	5	1	267	1757	1492	398	9.18e-112	7	100
XLOC_045014	Z27kG1_12870	267	1494	91.176	272	17	6	1	267	621	352	363	3.35e-101	7	100
XLOC_045014	Z27kG1_15145	267	1563	90.11	273	19	6	1	267	705	435	348	9.38e-97	8	100
XLOC_045236	Z27kG1_08337	716	1557	93.241	725	37	4	1	716	525	1246	1057	0	12	100
XLOC_045349	Z27kG1_11729	382	1491	92.95	383	23	4	1	382	1350	971	555	7.52e-159	4	100
XLOC_049717	Z27kG1_06872	438	1367	94.104	441	20	6	1	438	596	159	665	0	6	100
XLOC_049786	Z27kG1_24338	322	1420	100	322	0	0	1	322	198	519	595	3.69e-171	0	100
XLOC_049797	Z27kG1_06872	348	1367	93.714	350	17	5	1	347	174	521	520	2.48e-148	5	99
XLOC_049883	Z27kG1_21117	243	1335	93.496	246	10	6	1	243	681	439	361	1.09e-100	6	100
XLOC_049883	Z27kG1_21117	243	1335	97.674	43	1	0	39	81	519	477	75	1.59e-14	0	100
XLOC_050163	Z27kG1_22759	485	1671	97.107	484	13	1	1	484	1406	924	815	0	1	99
XLOC_050163	Z27kG1_08827	485	1675	97.095	482	14	0	3	484	1409	928	813	0	0	99
XLOC_050221	Z27kG1_18622	887	2615	94.837	891	41	5	1	887	1488	2377	1386	0	5	100
XLOC_050221	Z27kG1_05919	887	1758	94.653	879	42	5	1	876	590	1466	1358	0	5	99
XLOC_050221	Z27kG1_20079	887	1414	92.368	891	57	10	1	887	293	1176	1258	0	11	100
XLOC_050282	Z27kG1_20623	533	2039	90.828	447	30	6	1	439	1578	2021	588	1.05e-168	11	82
XLOC_050709	Z27kG1_21117	695	1335	97.059	34	1	0	342	375	983	950	58.4	4.81e-09	0	100
XLOC_050748	Z27kG1_21117	335	1335	100	35	0	0	301	335	477	511	65.8	1.34e-11	0	100
XLOC_051092	Z27kG1_08337	644	1557	98.602	644	9	0	1	644	1165	522	1140	0	0	100
XLOC_051118	Z27kG1_13282	620	1422	97.746	621	13	1	1	620	1177	557	1068	0	1	100
XLOC_051118	Z27kG1_13282	620	1422	92.713	247	13	4	378	620	745	500	351	1.76e-97	5	100
XLOC_051118	Z27kG1_13282	620	1422	90.278	216	15	5	380	591	685	472	278	3.02e-75	6	100
XLOC_051118	Z27kG1_10871	620	1971	94.839	620	31	1	1	620	1588	970	966	0	1	100
XLOC_051118	Z27kG1_10871	620	1971	91.093	247	16	5	378	620	1157	913	329	8.23e-91	6	100
XLOC_051118	Z27kG1_10871	620	1971	90.164	244	19	4	380	620	1097	856	313	8.29e-86	5	100
XLOC_051791	Z27kG1_08434	667	2809	93.284	670	40	5	1	667	1656	989	983	0	5	100
XLOC_052411	Z27kG1_16697	744	966	92.96	767	18	9	1	744	93	846	1085	0	36	100
XLOC_052633	Z27kG1_08337	914	1557	93.369	739	32	12	185	914	189	919	1077	0	17	80
XLOC_055298	Z27kG1_10871	1100	1971	90.625	320	28	2	54	373	280	597	424	6.6e-119	2	95
XLOC_055298	Z27kG1_10871	1100	1971	94.03	268	12	4	502	765	771	1038	403	8.6e-113	4	95
XLOC_055298	Z27kG1_10871	1100	1971	93.536	263	11	6	396	652	891	1153	387	8.66e-108	6	95
XLOC_055298	Z27kG1_10871	1100	1971	92.617	149	7	4	396	540	1005	1153	211	5.59e-55	4	95
XLOC_055298	Z27kG1_13282	1100	1422	91.973	299	23	1	75	373	1	298	418	3.07e-117	1	93
XLOC_055355	Z27kG1_10871	595	1971	94.108	594	33	2	1	593	1371	1963	902	0	2	99
XLOC_055591	Z27kG1_22759	591	1671	97.124	591	15	2	1	591	1373	785	996	0	2	100
XLOC_055591	Z27kG1_08827	591	1675	96.277	591	21	1	1	591	1378	789	968	0	1	100
XLOC_055690	Z27kG1_02405	206	813	97.059	204	6	0	3	206	602	805	344	9.14e-96	0	99
XLOC_055887	Z27kG1_18467	1127	1143	100	1127	0	0	1	1127	1131	5	2082	0	0	100
XLOC_055887	Z27kG1_18467	1127	1143	93.75	64	4	0	780	843	288	225	97.1	1.67e-20	0	100
XLOC_055887	Z27kG1_18467	1127	1143	93.75	64	4	0	844	907	352	289	97.1	1.67e-20	0	100
XLOC_056067	Z27kG1_19778	528	493	100	493	0	0	4	496	1	493	911	0	0	93
XLOC_056166	Z27kG1_15145	606	1563	94.089	609	32	3	1	606	1066	459	922	0	4	100
XLOC_056166	Z27kG1_05919	606	1758	90.196	612	48	11	1	606	1223	618	787	0	12	100
XLOC_056182	Z27kG1_06872	361	1367	98.892	361	2	2	1	361	444	802	643	0	2	100
XLOC_056182	Z27kG1_17460	361	1430	90.959	365	25	6	2	361	517	878	484	9.42e-138	8	99
XLOC_056425	Z27kG1_10871	569	1971	99.121	569	5	0	1	569	1624	1056	1024	0	0	100
XLOC_056425	Z27kG1_10871	569	1971	96.939	98	2	1	472	569	867	771	163	8.08e-41	1	100
XLOC_056425	Z27kG1_10871	569	1971	95.918	98	3	1	472	569	1038	942	158	3.76e-39	1	100
XLOC_056425	Z27kG1_10871	569	1971	94.898	98	4	1	472	569	981	885	152	1.75e-37	1	100
XLOC_056425	Z27kG1_10871	569	1971	93.878	98	5	1	472	569	924	828	147	8.14e-36	1	100
XLOC_056425	Z27kG1_13282	569	1422	94.386	570	30	2	2	569	1212	643	874	0	2	99
XLOC_056425	Z27kG1_13282	569	1422	95.918	98	3	1	472	569	568	472	158	3.76e-39	1	99
XLOC_056432	Z27kG1_20079	1155	1414	95.163	1137	37	12	22	1155	1414	293	1779	0	18	98
XLOC_056432	Z27kG1_18622	1155	2615	94.714	1135	46	13	28	1155	2615	1488	1751	0	14	98
XLOC_056432	Z27kG1_05919	1155	1758	95.341	923	31	10	237	1155	1504	590	1456	0	12	98
XLOC_056432	Z27kG1_05919	1155	1758	90.514	253	12	5	21	267	1752	1506	324	7.24e-89	12	98
XLOC_056432	Z27kG1_22169	1155	1529	90.329	972	68	23	196	1155	1363	406	1251	0	26	83
XLOC_056432	Z27kG1_12783	1155	1797	95.419	764	24	6	19	778	1793	1037	1206	0	11	98
XLOC_056432	Z27kG1_12783	1155	1797	99.307	433	2	1	724	1155	985	553	782	0	1	98
XLOC_056432	Z27kG1_12783	1155	1797	98.113	53	0	1	725	776	1037	985	91.6	7.99e-19	1	98
XLOC_061237	Z27kG1_10871	1031	1971	96.03	932	33	3	1	931	284	1212	1513	0	4	100
XLOC_061237	Z27kG1_10871	1031	1971	97.947	487	10	0	545	1031	771	1257	845	0	0	100
XLOC_061237	Z27kG1_10871	1031	1971	97.538	325	7	1	488	811	828	1152	555	2.1e-158	1	100
XLOC_061237	Z27kG1_10871	1031	1971	92.01	388	27	3	602	986	771	1157	542	1.63e-154	4	100
XLOC_061237	Z27kG1_10871	1031	1971	92.857	322	20	2	488	808	885	1204	464	3.64e-131	3	100
XLOC_061237	Z27kG1_10871	1031	1971	90.244	328	29	2	659	984	771	1097	425	1.72e-119	3	100
XLOC_061237	Z27kG1_10871	1031	1971	91.144	271	21	2	488	757	942	1210	364	3.8e-101	3	100
XLOC_061237	Z27kG1_13282	1031	1422	94.591	795	36	6	18	808	1	792	1223	0	7	98
XLOC_061237	Z27kG1_13282	1031	1422	96.467	368	12	1	659	1025	472	839	606	5.71e-174	1	98
XLOC_061237	Z27kG1_13282	1031	1422	91.867	332	22	4	602	931	472	800	459	1.69e-129	5	98
XLOC_061237	Z27kG1_13282	1031	1422	91.843	331	22	4	545	873	472	799	457	6.09e-129	5	98
XLOC_061237	Z27kG1_13282	1031	1422	90.876	274	22	2	716	986	472	745	364	3.8e-101	3	98
XLOC_061237	Z27kG1_13282	1031	1422	90.441	272	22	3	488	757	529	798	355	2.29e-98	4	98
XLOC_061639	Z27kG1_22759	524	1671	95.745	517	17	4	10	524	408	921	828	0	5	98
XLOC_061639	Z27kG1_08827	524	1675	94.015	518	24	6	10	524	412	925	778	0	7	98
XLOC_061654	Z27kG1_17411	378	1330	94.203	345	19	1	22	365	1330	986	525	5.83e-150	1	91
XLOC_061686	Z27kG1_08337	475	1557	94.08	473	17	8	1	469	203	668	708	0	11	99
XLOC_061831	Z27kG1_08337	579	1557	98.584	565	8	0	15	579	1549	985	1000	0	0	98
XLOC_061841	Z27kG1_21974	583	1898	94.664	581	25	2	1	578	1063	1640	896	0	6	99
XLOC_061915	Z27kG1_06872	297	1367	91.694	301	18	7	1	297	183	480	411	1.32e-115	7	100
XLOC_062064	Z27kG1_23669	232	878	91.416	233	18	2	1	232	759	528	318	6.31e-88	2	100
XLOC_062064	Z27kG1_14570	232	1594	90.558	233	20	2	1	232	555	786	307	1.37e-84	2	100
XLOC_062128	Z27kG1_21117	992	1335	97.059	34	1	0	653	686	983	950	58.4	6.94e-09	0	93
XLOC_062145	Z27kG1_15145	988	1563	93.662	994	56	7	1	988	388	1380	1480	0	7	100
XLOC_062291	Z27kG1_10871	712	1971	92.857	126	5	4	1	123	1028	1152	180	1.01e-45	4	99
XLOC_062366	Z27kG1_16942	429	2086	97.46	433	7	1	1	429	1016	1448	736	0	4	100
XLOC_062430	Z27kG1_12783	828	1797	96.747	830	20	6	1	828	505	1329	1376	0	7	100
XLOC_062430	Z27kG1_12783	828	1797	99.065	107	1	0	483	589	931	1037	193	1.51e-49	0	100
XLOC_062430	Z27kG1_12783	828	1797	99.065	107	0	1	432	537	985	1091	191	5.45e-49	1	100
XLOC_062430	Z27kG1_12783	828	1797	100	54	0	0	430	483	1037	1090	100	9.44e-22	0	100
XLOC_062430	Z27kG1_12783	828	1797	100	53	0	0	538	590	933	985	99	3.4e-21	0	100
XLOC_062430	Z27kG1_05919	828	1758	94.617	483	23	3	1	483	542	1021	745	0	3	93
XLOC_062430	Z27kG1_05919	828	1758	96.491	285	10	0	538	822	970	1254	472	1.74e-133	0	93
XLOC_062430	Z27kG1_20079	828	1414	94.617	483	18	7	1	483	245	719	741	0	8	100
XLOC_062430	Z27kG1_20079	828	1414	98.282	291	5	0	538	828	668	958	510	3.68e-145	0	100
XLOC_062430	Z27kG1_20079	828	1414	98.182	55	1	0	483	537	666	720	97.1	1.22e-20	0	100
XLOC_062430	Z27kG1_18622	828	2615	94.421	484	20	4	1	483	1443	1920	737	0	7	93
XLOC_062430	Z27kG1_18622	828	2615	98.246	285	5	0	538	822	1869	2153	499	7.97e-142	0	93
XLOC_062430	Z27kG1_22169	828	1529	95.876	291	11	1	538	828	785	1074	470	6.25e-133	1	99
XLOC_062430	Z27kG1_22169	828	1529	98.182	55	1	0	483	537	783	837	97.1	1.22e-20	0	99
XLOC_063754	Z27kG1_11861	598	1532	94.444	396	18	2	100	495	1139	1530	606	3.27e-174	4	83
XLOC_063754	Z27kG1_11861	598	1532	93.333	180	11	1	395	573	1351	1530	265	2.27e-71	1	83
XLOC_063754	Z27kG1_11861	598	1532	90.4	125	11	1	473	596	1351	1475	163	8.51e-41	1	83
XLOC_063754	Z27kG1_11861	598	1532	90.196	102	9	1	316	417	1430	1530	132	2.4e-31	1	83
XLOC_066556	Z27kG1_06872	290	1367	98.966	290	3	0	1	290	909	620	520	2.05e-148	0	100
XLOC_066559	Z27kG1_19096	315	1392	95.72	257	10	1	58	314	1392	1137	412	3.9e-116	1	82
XLOC_066617	Z27kG1_19096	213	1392	95.855	193	7	1	1	193	1201	1392	311	9.61e-86	1	91
XLOC_066850	Z27kG1_15145	606	1563	92.933	566	32	7	1	563	912	352	817	0	8	93
XLOC_066850	Z27kG1_05919	606	1758	90.782	499	37	9	1	497	1068	577	658	0	9	82
XLOC_067000	Z27kG1_21974	528	1898	94.34	530	24	2	2	528	1629	1103	808	0	6	99
XLOC_067102	Z27kG1_10871	480	1971	98.958	480	5	0	1	480	305	784	859	0	0	100
XLOC_067102	Z27kG1_13282	480	1422	96.466	481	16	1	1	480	5	485	793	0	1	100
XLOC_067163	Z27kG1_22169	435	1529	90.847	437	35	5	1	435	854	1287	580	1.42e-166	5	100
XLOC_067614	Z27kG1_13282	477	1422	91.453	468	37	3	1	466	1057	591	640	0	3	100
XLOC_067614	Z27kG1_10871	477	1971	93.21	162	9	2	317	477	924	764	237	3.91e-63	2	100
XLOC_067614	Z27kG1_10871	477	1971	95.333	150	6	1	317	466	1038	890	237	3.91e-63	1	100
XLOC_067614	Z27kG1_10871	477	1971	94.667	150	7	1	317	466	981	833	231	1.82e-61	1	100
XLOC_067614	Z27kG1_10871	477	1971	93.814	97	6	0	317	413	867	771	147	6.77e-36	0	100
XLOC_067615	Z27kG1_07914	289	1981	96.54	289	9	1	1	289	499	786	477	1.25e-135	1	100
