# Supplementary material for: Transcriptome Analysis of Tolerant and Susceptible Maize Genotypes Reveals Novel Insights about the Molecular Mechanisms Underlying Drought Responses in Leaves
Source: Int J Mol Sci. 2021 Jun 29;22(13):6980. doi: 10.3390/ijms22136980 (PMC8268334; doi:10.3390/ijms22136980)
Supplement: Supplementary file 1 [file ijms-22-06980-s001.zip › Supplementary Tables/Table S4.xlsx]

## Sheet: Table S4
Table S4: Drought responsive genes up-regulated in CML69 with no changes observed in LX9801 after 3D of drought stress treatment. The extent of differential expression is measured in terms of log2 Fold Change and hyphen (-) indicates failure to meet the significance cut off or undetected. Values in red and blue indicate the log2 Fold Change increases or decreases in the drought-stressed seedlings…
Stress stage	GO/KEGG	gene	CML69(log2FoldChange)	LX9801(log2FoldChange)	Best-hit-A.th	Arabi-symbol	Annotation
C vs 3D	cellular carbohydrate metabolic process	Zm00001d005775	1.71953	-	AT5G17420.1	CESA7	Cellulose synthase family protein
		Zm00001d020531	1.37764	-	AT5G17420.1	CESA7	Cellulose synthase family protein
		Zm00001d032776	1.57159	-	AT2G21770.1	CESA9	Cellulose synthase family protein
		Zm00001d029087	1.38541	-	AT4G02280.1	SUS3	sucrose synthase 3
		Zm00001d022085	2.11653	-	AT3G08900.1	RGP3	reversibly glycosylated polypeptide 3
		Zm00001d048608	2.91327	-	AT1G70230.1	TBL27	TRICHOME BIREFRINGENCE-LIKE 27
		Zm00001d050323	1.15211	-	AT5G67310.1	CYP81G1	cytochrome P450, family 81, subfamily G, polypeptide 1
	cell cycle	Zm00001d002186	1.80435	-	AT4G05190.1	ATK5	kinesin 5
		Zm00001d041826	1.3646	-	AT5G63370.3	CDKG1	Cyclin-dependent kinase
		Zm00001d011967	1.24509	-	AT5G64960.1	CDKC2	cyclin dependent kinase group C2
		Zm00001d013612	1.04805	-	AT5G23860.2	TUB8	tubulin beta 8
		Zm00001d015348	2.13847	-	AT5G23860.2	TUB8	tubulin beta 8
	macromolecule localization	Zm00001d020783	1.09889	-	AT4G08520.1	AT4G08520	SNARE-like superfamily protein
		Zm00001d023343	1.18069	-	AT2G38540.1	LP1	lipid transfer protein 1
		Zm00001d046945	1.76824	-	AT1G30900.1	VSR6	VACUOLAR SORTING RECEPTOR 6
	Isoquinoline alkaloid biosynthesis	Zm00001d038665	2.49015	-	AT2G20340.1	TAT3	tyrosine aminotransferase
		Zm00001d048736	1.01585	-	AT5G53970.1	TAT7	Tyrosine transaminase family protein
	Glycolysis / Gluconeogenesis	Zm00001d012407	1.29464	-	AT3G55440.1	TPI	triosephosphate isomerase
		Zm00001d020309	1.96586	-	AT1G74030.1	ENO1	enolase 1
		Zm00001d042279	1.27015	-	AT4G38970.1	FBA2	Fructose-bisphosphate aldolase-2
	Endocytosis	Zm00001d008295	1.08266	-	AT1G10630.2	ARFA1F	ADP-ribosylation factor A1F
		Zm00001d012420	1.07959	-	AT5G02500.1	HSC70-1	heat shock cognate protein 70-1
		Zm00001d028002	1.28052	-	AT5G65270.1	RABA4a	RAB GTPase homolog A4A
	Amino sugar and nucleotide sugar metabolism	Zm00001d009908	1.07607	-	AT2G47650.1	UXS4	UDP-xylose synthase 4
		Zm00001d020093	1.88588	-	AT4G10960.1	UGE5	UDP-D-glucose/UDP-D-galactose 4-epimerase 5
	Metabolic pathways	Zm00001d024314	1.33899	-	AT4G37970.1	CAD6	cinnamyl alcohol dehydrogenase 6
		Zm00001d038366	1.15203	-	AT3G11430.1	GPAT5	glycerol-3-phosphate acyltransferase 5
		Zm00001d053554	2.23701	-	AT5G05340.1	PRX52	Peroxidase superfamily protein
	Biosynthesis of secondary metabolites	Zm00001d039094	2.14752	-	AT2G26640.1	KCS11	3-ketoacyl-CoA synthase 11
	Others	Zm00001d007606	1.22245	-	AT5G41040.2	RWP1	HXXXD-type acyl-transferase family protein
		Zm00001d037619	1.27208	-	AT3G62160.1		HXXXD-type acyl-transferase family protein
		Zm00001d046455	1.14079	-	AT3G62160.1		HXXXD-type acyl-transferase family protein
		Zm00001d048520	1.18492	-	AT1G73190.1	TIP3;1	Aquaporin-like superfamily protein
		Zm00001d015434	1.20571	-	AT3G21890.1	BBX31	B-box type zinc finger family protein
		Zm00001d044683	1.37274	-	AT5G05270.2	CHIL	Chalcone-flavanone isomerase family protein
		Zm00001d007918	1.12396	-	AT5G07990.1	TT7	Cytochrome P450 superfamily protein
		Zm00001d036003	1.44593	-	AT4G25480.1	DREB1A	dehydration response element B1A
		Zm00001d013565	3.69165	-	AT4G37810.1	AtEPFL2	EPIDERMAL PATTERNING FACTOR-like protein
		Zm00001d024324	2.15127	-	AT1G28370.2	ERF11	ERF domain protein 11
		Zm00001d046865	1.3114	-	AT5G57800.1	CER3	ECERIFERUM 3
		Zm00001d013154	1.76703	-	AT5G42710.3	TRM30	hypothetical protein
		Zm00001d042906	1.03764	-	AT5G60020.1	LAC17	laccase 17
		Zm00001d008850	1.05129	-	AT1G17620.1	LEA	Late embryogenesis abundant (LEA)
		Zm00001d010545	2.97633	-	AT5G18520.1	CAND7	Lung seven transmembrane receptor family protein
		Zm00001d045667	1.00717	-	AT1G68570.1	NPF3.1	Major facilitator superfamily protein
		Zm00001d026670	1.12808	-	AT4G27940.1	MTM1	manganese tracking factor for mitochondrial SOD2
		Zm00001d041853	1.19227	-	AT4G38620.1	MYB4	myb domain protein 4
		Zm00001d002476	1.70193	-	AT1G79180.1	MYB63	myb domain protein 63
		Zm00001d043735	1.22774	-	AT3G14770.1	SWEET2	Nodulin MtN3 family protein
		Zm00001d048947	1.56112	-	AT3G04720.1	PR4	pathogenesis-related 4
		Zm00001d032069	1.17518	-	AT2G05940.1	RIPK	Protein kinase superfamily protein
		Zm00001d004102	1.26776	-	AT4G31920.1	RR10	response regulator 10
		Zm00001d021456	1.63069	-	AT1G29500.1	SAUR66	SAUR-like auxin-responsive protein family
		Zm00001d046866	1.91937	-	AT2G23810.1	TET8	tetraspanin8
		Zm00001d039011	2.48903	-	AT1G28480.1	GRX480	Thioredoxin superfamily protein
		Zm00001d005092	1.12584	-	AT3G55990.1	ESK1	trichome birefringence-like protein (DUF828)
C vs 5D	cellular carbohydrate metabolic process	Zm00001d005775	1.32116	2.04074	AT5G17420.1	CESA7	Cellulose synthase family protein
		Zm00001d020531	1.42596	1.96564	AT5G17420.1	CESA7	Cellulose synthase family protein
		Zm00001d032776	1.40693	1.86944	AT2G21770.1	CESA9	Cellulose synthase family protein
		Zm00001d029087	2.77466	4.59883	AT4G02280.1	SUS3	sucrose synthase 3
		Zm00001d022085	1.02912	1.17258	AT3G08900.1	RGP3	reversibly glycosylated polypeptide 3
		Zm00001d048608	2.78052	10.9431	AT1G70230.1	TBL27	TRICHOME BIREFRINGENCE-LIKE 27
		Zm00001d050323	3.3177	1.12548	AT5G67310.1	CYP81G1	cytochrome P450, family 81, subfamily G, polypeptide 1
	cell cycle	Zm00001d002186	2.19741	2.21237	AT4G05190.1	ATK5	kinesin 5
		Zm00001d011967	3.97033	2.54583	AT5G64960.1	CDKC2	cyclin dependent kinase group C2
		Zm00001d013612	1.04257	1.46644	AT5G23860.2	TUB8	tubulin beta 8
		Zm00001d015348	3.48358	1.04612	AT5G23860.2	TUB8	tubulin beta 8
		Zm00001d041826	2.04027	1.31897	AT5G63370.3	CDKG1	Cyclin-dependent kinase
	macromolecule localization	Zm00001d020783	1.35632	1.29254	AT4G08520.1	AT4G08520	SNARE-like superfamily protein
		Zm00001d023343	1.44671	1.66814	AT2G38540.1	LP1	lipid transfer protein 1
		Zm00001d046945	1.63696	1.64824	AT1G30900.1	VSR6	VACUOLAR SORTING RECEPTOR 6
	Isoquinoline alkaloid biosynthesis	Zm00001d038665	4.10943	2.1463	AT2G20340.1	TAT3	tyrosine aminotransferase
		Zm00001d048736	2.78667	2.59035	AT5G53970.1	TAT7	Tyrosine transaminase family protein
	Glycolysis / Gluconeogenesis	Zm00001d012407	-	1.00915	AT3G55440.1	TPI	triosephosphate isomerase
		Zm00001d020309	3.13068	1.23827	AT1G74030.1	ENO1	enolase 1
		Zm00001d042279	2.31313	1.42021	AT4G38970.1	FBA2	Fructose-bisphosphate aldolase-2
	Endocytosis	Zm00001d008295	-	2.60657	AT1G10630.2	ARFA1F	ADP-ribosylation factor A1F
		Zm00001d012420	3.58433	1.67943	AT5G02500.1	HSC70-1	heat shock cognate protein 70-1
		Zm00001d028002	-	1.18132	AT5G65270.1	RABA4a	RAB GTPase homolog A4A
	Amino sugar and nucleotide sugar metabolism	Zm00001d009908	1.73065	1.53539	AT2G47650.1	UXS4	UDP-xylose synthase 4
		Zm00001d020093	2.40425	1.19686	AT4G10960.1	UGE5	UDP-D-glucose/UDP-D-galactose 4-epimerase 5
	Metabolic pathways	Zm00001d024314	3.41792	1.86203	AT4G37970.1	CAD6	cinnamyl alcohol dehydrogenase 6
		Zm00001d038366	2.02911	1.29556	AT3G11430.1	GPAT5	glycerol-3-phosphate acyltransferase 5
		Zm00001d053554	4.76602	1.7341	AT5G05340.1	PRX52	Peroxidase superfamily protein
	Biosynthesis of secondary metabolites	Zm00001d039094	3.1547	2.48515	AT2G26640.1	KCS11	3-ketoacyl-CoA synthase 11
	Others	Zm00001d007606	1.54436	-2.0451	AT5G41040.2	RWP1	HXXXD-type acyl-transferase family protein
		Zm00001d037619	1.79751	1.44807	AT3G62160.1		HXXXD-type acyl-transferase family protein
		Zm00001d046455	-	1.13851	AT3G62160.1		HXXXD-type acyl-transferase family protein
		Zm00001d048520	-	-1.09009	AT1G73190.1	TIP3;1	Aquaporin-like superfamily protein
		Zm00001d015434	3.43635	3.32016	AT3G21890.1	BBX31	B-box type zinc finger family protein
		Zm00001d044683	1.74306	1.69808	AT5G05270.2	CHIL	Chalcone-flavanone isomerase family protein
		Zm00001d007918	2.13255	1.38336	AT5G07990.1	TT7	Cytochrome P450 superfamily protein
		Zm00001d036003	1.71869	3.2216	AT4G25480.1	DREB1A	dehydration response element B1A
		Zm00001d013565	4.48104	-1.57844	AT4G37810.1	AtEPFL2	EPIDERMAL PATTERNING FACTOR-like protein
		Zm00001d024324	-	2.25964	AT1G28370.2	ERF11	ERF domain protein 11
		Zm00001d046865	2.412	1.76578	AT5G57800.1	CER3	ECERIFERUM 3
		Zm00001d013154	2.34448	1.99371	AT5G42710.3	TRM30	hypothetical protein
		Zm00001d042906	1.6948	1.99881	AT5G60020.1	LAC17	laccase 17
		Zm00001d008850	-	1.4454	AT1G17620.1	LEA	Late embryogenesis abundant (LEA)
		Zm00001d010545	-	2.90768	AT5G18520.1	CAND7	Lung seven transmembrane receptor family protein
		Zm00001d045667	3.75615	2.60812	AT1G68570.1	NPF3.1	Major facilitator superfamily protein
		Zm00001d026670	2.08104	1.26607	AT4G27940.1	MTM1	manganese tracking factor for mitochondrial SOD2
		Zm00001d041853	1.32475	2.43943	AT4G38620.1	MYB4	myb domain protein 4
		Zm00001d002476	1.41813	4.02294	AT1G79180.1	MYB63	myb domain protein 63
		Zm00001d043735	3.46199	2.17061	AT3G14770.1	SWEET2	Nodulin MtN3 family protein
		Zm00001d048947	3.34201	-1.71478	AT3G04720.1	PR4	pathogenesis-related 4
		Zm00001d032069	2.07414	1.6858	AT2G05940.1	RIPK	Protein kinase superfamily protein
		Zm00001d004102	1.43139	1.54142	AT4G31920.1	RR10	response regulator 10
		Zm00001d021456	2.41442	1.59527	AT1G29500.1	SAUR66	SAUR-like auxin-responsive protein family
		Zm00001d046866	3.17645	2.05696	AT2G23810.1	TET8	tetraspanin8
		Zm00001d039011	2.67472	1.67606	AT1G28480.1	GRX480	Thioredoxin superfamily protein
		Zm00001d005092	1.59358	1.20403	AT3G55990.1	ESK1	trichome birefringence-like protein (DUF828)
