# Supplementary material for: Transcriptome Analysis of Tolerant and Susceptible Maize Genotypes Reveals Novel Insights about the Molecular Mechanisms Underlying Drought Responses in Leaves
Source: Int J Mol Sci. 2021 Jun 29;22(13):6980. doi: 10.3390/ijms22136980 (PMC8268334; doi:10.3390/ijms22136980)
Supplement: Supplementary file 1 [file ijms-22-06980-s001.zip › Supplementary Tables/Table S5.xlsx]

## Sheet: Table S5
Table S5: Drought responsive genes down-regulated in CML69 with no changes observed in LX9801 after 3D of drought stress treatment. The extent of differential expression is measured in terms of log2 Fold Change and hyphen (-) indicates failure to meet the significance cut off or undetected. Values in red and blue indicate the log2 Fold Change increases or decreases in the drought-stressed seedlin…
Stress stage	GO/KEGG	gene	CML69(log2FoldChange)	LX9801(log2FoldChange)	Best-hit-A.th	Arabi-symbol	Annotation
C vs 3D	cellular catabolic process	Zm00001d003058	-1.23943	-	AT1G08630.5	THA1	threonine aldolase 1
		Zm00001d007201	-1.05025	-	AT1G15100.1	RHA2A	RING-H2 finger A2A
		Zm00001d026010	-1.61975	-	AT1G65810.2	AT1G65810	P-loop containing nucleoside triphosphate hydrolases superfamily protein
		Zm00001d029747	-1.98337	-	AT1G05260.1	RCI3	Peroxidase superfamily protein
		Zm00001d030348	-1.48439	-	AT1G64710.1	AT1G64710	GroES-like zinc-binding alcohol dehydrogenase family protein
		Zm00001d032830	-1.13252	-	AT5G41340.2	UBC4	ubiquitin conjugating enzyme 4
		Zm00001d036348	-1.14848	-	AT1G20823.1	AtATL80	RING/U-box superfamily protein
		Zm00001d038371	-1.31545	-	AT5G60020.1	LAC17	laccase 17
	cellular carbohydrate metabolic process	Zm00001d012322	-1.23027	-	AT4G37370.1	CYP81D8	cytochrome P450%2C family 81%2C subfamily D%2C polypeptide 8
		Zm00001d013231	-2.22165	-	AT5G10600.1	CYP81K2	cytochrome P450%2C family 81%2C subfamily K%2C polypeptide 2
		Zm00001d046098	-1.07053	-	AT1G68020.3	ATTPS6	UDP-Glycosyltransferase / trehalose-phosphatase family protein
	cellular response to stimulus	Zm00001d048795	-1.21514	-	AT1G26355.1	SP1L1	SPIRAL1-like1
	proteolysis	Zm00001d020604	-1.02713	-	AT3G27925.2	DEG1	DegP protease 1
		Zm00001d039870	-1.12661	-	AT2G29050.1	RBL1	RHOMBOID-like 1
		Zm00001d043581	-1.20356	-	AT5G45650.2	AT5G45650	subtilase family protein
	response to chemical stimulus	Zm00001d008209	-1.58001	-	AT3G62030.1	ROC4	rotamase CYP 4
		Zm00001d021634	-1.78458	-	AT4G21870.1	AT4G21870	HSP20-like chaperones superfamily protein
	transmembrane transport	Zm00001d004633	-1.13331	-	AT5G16740.1	AT5G16740	Transmembrane amino acid transporter family protein
		Zm00001d025031	-1.10686	-	AT5G60740.1	ABCG28	ABC transporter family protein
		Zm00001d029098	-2.48499	-	AT4G15920.1	SWEET17	Nodulin MtN3 family protein
		Zm00001d030250	-1.84874	-	AT1G47530.1	DTX33	MATE efflux family protein
		Zm00001d037017	-1.39335	-	AT1G17120.1	CAT8	cationic amino acid transporter 8
	metabolic process	Zm00001d001860	-1.07101	-	AT4G39970.1	AT4G39970	Haloacid dehalogenase-like hydrolase (HAD) superfamily protein
		Zm00001d006397	-1.36035	-	AT1G22360.1	UGT85A2	UDP-glucosyl transferase 85A2
		Zm00001d007267	-1.13239	-	AT4G10340.1	LHCB5	light harvesting complex of photosystem II 5
		Zm00001d009971	-1.06874	-	AT5G12330.2	LRP1	Lateral root primordium (LRP) protein-like protein
		Zm00001d011152	-1.02868	-	AT4G24190.1	SHD	Chaperone protein htpG family protein
		Zm00001d020793	-1.89239	-	AT1G72230.1	AT1G72230	Cupredoxin superfamily protein
		Zm00001d021207	-1.23512	-	AT4G25480.1	DREB1A	dehydration response element B1A
		Zm00001d021929	-1.21079	-	AT4G36810.1	GGPS1	geranylgeranyl pyrophosphate synthase 1
		Zm00001d028245	-1.11547	-	AT2G19130.1	AT2G19130	S-locus lectin protein kinase family protein
		Zm00001d030339	-1.98624	-	AT2G16600.1	ROC3	rotamase CYP 3
		Zm00001d033152	-1.09025	-	AT3G26300.1	CYP71B34	cytochrome P450%2C family 71%2C subfamily B%2C polypeptide 34
		Zm00001d034104	-1.57537	-	AT4G37410.1	CYP81F4	cytochrome P450%2C family 81%2C subfamily F%2C polypeptide 4
		Zm00001d040076	-1.02841	-	AT1G15110.4	PSS1	phosphatidyl serine synthase family protein
		Zm00001d046676	-1.00933	-	AT5G38530.1	TSBtype2	tryptophan synthase beta type 2
		Zm00001d053761	-1.11501	-	AT4G03390.2	SRF3	STRUBBELIG-receptor family 3
		Zm00001d054080	-1.316	-	AT1G76890.2	GT2	Duplicated homeodomain-like superfamily protein
	Plant hormone signal transduction	Zm00001d009309	-1.18229	-	AT5G57560.1	TCH4	Xyloglucan endotransglucosylase/hydrolase family protein
		Zm00001d025947	-1.61399	-	AT3G60690.1	SAUR59	SAUR-like auxin-responsive protein family
		Zm00001d033976	-1.38068	-	AT3G04730.1	IAA16	indoleacetic acid-induced protein 16
		Zm00001d047705	-1.45917	-	AT2G38310.1	PYL4	PYR1-like 4
	Starch and sucrose metabolism	Zm00001d047253	-1.70864	-	AT3G43190.2	SUS4	sucrose synthase 4
		Zm00001d010755	-1.8684	-	AT1G78580.4	TPS1	trehalose-6-phosphate synthase
	Others	Zm00001d004903	-1.09322	-	AT5G22390.1	AT5G22390	FANTASTIC four-like protein (DUF3049)
		Zm00001d012414	-1.30967	-	AT2G39705.1	RTFL8	ROTUNDIFOLIA like 8
		Zm00001d012646	-1.41854	-	AT3G44020.1	AT3G44020	thylakoid lumenal P17.1 protein
		Zm00001d015889	-1.02334	-	AT1G12380.1	AT1G12380	hypothetical protein
		Zm00001d021653	-1.02808	-	AT1G61800.1	GPT2	glucose-6-phosphate/phosphate translocator 2
		Zm00001d023282	-1.34483	-	AT1G08810.1	MYB60	myb domain protein 60
		Zm00001d024500	-1.0195	-	AT5G45320.1	LEA	late embryogenesis abundant protein
		Zm00001d036122	-1.38708	-	AT3G18170.2	AT3G18170	Glycosyltransferase family 61 protein
		Zm00001d036989	-1.13216	-	AT4G37820.2	AT4G37820	transmembrane protein
		Zm00001d037043	-1.00158	-	AT5G41761.1	AT5G41761	hypothetical protein
		Zm00001d044465	-1.06171	-	AT1G28590.1	AT1G28590	GDSL-like Lipase/Acylhydrolase superfamily protein
		Zm00001d046690	-1.6158	-	AT2G33570.1	GALS1	glycosyltransferase family protein (DUF23)
		Zm00001d053446	-1.05575	-	AT4G18290.2	KAT2	potassium channel KAT1-like protein
C vs 5D	cellular catabolic process	Zm00001d003058	-2.36424	-1.63605	AT1G08630.5	THA1	threonine aldolase 1
		Zm00001d007201	-1.50871	-1.63987	AT1G15100.1	RHA2A	RING-H2 finger A2A
		Zm00001d026010	-3.18283	-1.51412	AT1G65810.2	AT1G65810	P-loop containing nucleoside triphosphate hydrolases superfamily protein
		Zm00001d029747	-1.20987	-1.12612	AT1G05260.1	RCI3	Peroxidase superfamily protein
		Zm00001d030348	-1.95353	1.09148	AT1G64710.1	AT1G64710	GroES-like zinc-binding alcohol dehydrogenase family protein
		Zm00001d032830	-1.11246	-1.38581	AT5G41340.2	UBC4	ubiquitin conjugating enzyme 4
		Zm00001d036348	-1.33417	-1.43803	AT1G20823.1	AtATL80	RING/U-box superfamily protein
		Zm00001d038371	-	1.06517	AT5G60020.1	LAC17	laccase 17
	cellular carbohydrate metabolic process	Zm00001d012322	-	-1.31247	AT4G37370.1	CYP81D8	cytochrome P450%2C family 81%2C subfamily D%2C polypeptide 8
		Zm00001d013231	-2.54692	-2.40166	AT5G10600.1	CYP81K2	cytochrome P450%2C family 81%2C subfamily K%2C polypeptide 2
		Zm00001d046098	-1.67364	-1.43787	AT1G68020.3	ATTPS6	UDP-Glycosyltransferase / trehalose-phosphatase family protein
	cellular response to stimulus	Zm00001d048795	-1.35355	-1.57464	AT1G26355.1	SP1L1	SPIRAL1-like1
	proteolysis	Zm00001d020604	-	-1.03569	AT3G27925.2	DEG1	DegP protease 1
		Zm00001d039870	-1.23834	-1.08024	AT2G29050.1	RBL1	RHOMBOID-like 1
		Zm00001d043581	-	1.05242	AT5G45650.2	AT5G45650	subtilase family protein
	response to chemical stimulus	Zm00001d008209	-1.8974	-1.07693	AT3G62030.1	ROC4	rotamase CYP 4
		Zm00001d021634	-2.25535	-1.75671	AT4G21870.1	AT4G21870	HSP20-like chaperones superfamily protein
	transmembrane transport	Zm00001d004633	-	9.8855	AT5G16740.1	AT5G16740	Transmembrane amino acid transporter family protein
		Zm00001d025031	-1.42189	-1.03851	AT5G60740.1	ABCG28	ABC transporter family protein
		Zm00001d029098	-	9.72778	AT4G15920.1	SWEET17	Nodulin MtN3 family protein
		Zm00001d030250	-1.659	-1.11888	AT1G47530.1	DTX33	MATE efflux family protein
		Zm00001d037017	-1.00994	-1.03553	AT1G17120.1	CAT8	cationic amino acid transporter 8
	metabolic process	Zm00001d001860	-2.31808	-1.3606	AT4G39970.1	AT4G39970	Haloacid dehalogenase-like hydrolase (HAD) superfamily protein
		Zm00001d006397	-1.77794	-3.67334	AT1G22360.1	UGT85A2	UDP-glucosyl transferase 85A2
		Zm00001d007267	-2.04946	-1.33873	AT4G10340.1	LHCB5	light harvesting complex of photosystem II 5
		Zm00001d009971	-1.67496	-2.09538	AT5G12330.2	LRP1	Lateral root primordium (LRP) protein-like protein
		Zm00001d011152	-1.00252	-1.02418	AT4G24190.1	SHD	Chaperone protein htpG family protein
		Zm00001d020793	-2.14706	-1.13822	AT1G72230.1	AT1G72230	Cupredoxin superfamily protein
		Zm00001d021207	-2.57463	-2.11564	AT4G25480.1	DREB1A	dehydration response element B1A
		Zm00001d021929	-	2.42314	AT4G36810.1	GGPS1	geranylgeranyl pyrophosphate synthase 1
		Zm00001d028245	-1.47197	-1.48156	AT2G19130.1	AT2G19130	S-locus lectin protein kinase family protein
		Zm00001d030339	-2.04033	-1.0319	AT2G16600.1	ROC3	rotamase CYP 3
		Zm00001d033152	-	-2.31498	AT3G26300.1	CYP71B34	cytochrome P450%2C family 71%2C subfamily B%2C polypeptide 34
		Zm00001d034104	1.90626	2.24114	AT4G37410.1	CYP81F4	cytochrome P450%2C family 81%2C subfamily F%2C polypeptide 4
		Zm00001d040076	-	-1.18509	AT1G15110.4	PSS1	phosphatidyl serine synthase family protein
		Zm00001d046676	-	1.10386	AT5G38530.1	TSBtype2	tryptophan synthase beta type 2
		Zm00001d053761	-	-2.20169	AT4G03390.2	SRF3	STRUBBELIG-receptor family 3
		Zm00001d054080	-3.05324	-1.20133	AT1G76890.2	GT2	Duplicated homeodomain-like superfamily protein
	Plant hormone signal transduction	Zm00001d009309	-2.53603	-2.40622	AT5G57560.1	TCH4	Xyloglucan endotransglucosylase/hydrolase family protein
		Zm00001d025947	-1.13838	1.60174	AT3G60690.1	SAUR59	SAUR-like auxin-responsive protein family
		Zm00001d033976	-4.28521	-1.05873	AT3G04730.1	IAA16	indoleacetic acid-induced protein 16
		Zm00001d047705	-2.18989	-2.87342	AT2G38310.1	PYL4	PYR1-like 4
	Starch and sucrose metabolism	Zm00001d047253	-2.23529	-1.37195	AT3G43190.2	SUS4	sucrose synthase 4
		Zm00001d010755	-3.35318	-1.09218	AT1G78580.4	TPS1	trehalose-6-phosphate synthase
	Others	Zm00001d004903	-1.07908	-1.33446	AT5G22390.1	AT5G22390	FANTASTIC four-like protein (DUF3049)
		Zm00001d012414	-	1.03303	AT2G39705.1	RTFL8	ROTUNDIFOLIA like 8
		Zm00001d012646	-1.93339	-1.03855	AT3G44020.1	AT3G44020	thylakoid lumenal P17.1 protein
		Zm00001d015889	-1.76789	-1.25309	AT1G12380.1	AT1G12380	hypothetical protein
		Zm00001d021653	-2.03788	1.00969	AT1G61800.1	GPT2	glucose-6-phosphate/phosphate translocator 2
		Zm00001d023282	-	-1.05659	AT1G08810.1	MYB60	myb domain protein 60
		Zm00001d024500	-1.08671	-1.13399	AT5G45320.1	LEA	late embryogenesis abundant protein
		Zm00001d036122	-2.57719	-2.13287	AT3G18170.2	AT3G18170	Glycosyltransferase family 61 protein
		Zm00001d036989	-1.50199	1.04491	AT4G37820.2	AT4G37820	transmembrane protein
		Zm00001d037043	-1.61696	-1.654	AT5G41761.1	AT5G41761	hypothetical protein
		Zm00001d044465	-1.72865	-1.03588	AT1G28590.1	AT1G28590	GDSL-like Lipase/Acylhydrolase superfamily protein
		Zm00001d046690	-3.7597	-1.0766	AT2G33570.1	GALS1	glycosyltransferase family protein (DUF23)
		Zm00001d053446	-1.63326	-1.06191	AT4G18290.2	KAT2	potassium channel KAT1-like protein
