# Supplementary material for: Transcriptome Analysis of Tolerant and Susceptible Maize Genotypes Reveals Novel Insights about the Molecular Mechanisms Underlying Drought Responses in Leaves
Source: Int J Mol Sci. 2021 Jun 29;22(13):6980. doi: 10.3390/ijms22136980 (PMC8268334; doi:10.3390/ijms22136980)
Supplement: Supplementary file 1 [file ijms-22-06980-s001.zip › Supplementary Tables/Table S6.xlsx]

## Sheet: Table S6
Table S6: Drought responsive genes up-regulated in CML69 with no changes observed in LX9801 after 5D of drought stress treatment. The extent of differential expression is measured in terms of log2 Fold Change and hyphen (-) indicates failure to meet the significance cut off or undetected. Values in red and blue indicate the log2 Fold Change increases or decreases in the drought-stressed seedlings…
Stress stage	GO/KEGG	gene	CML69(log2FoldChange)	LX9801(log2FoldChange)	Best-hit-A.th	Arabi-symbol	Annotation
C vs 3D	localization	Zm00001d002614	-	-1.6131	AT1G63010.7	VPT1	Major Facilitator Superfamily with SPX (SYG1/Pho81/XPR1) domain-containing protein
		Zm00001d008242	-	1.25906	AT3G20000.1	TOM40	translocase of the outer mitochondrial membrane 40
		Zm00001d020925	-	-1.27962	AT5G13070.1	AT5G13070	MSF1-like family protein
		Zm00001d026070	-	1.07462	AT1G63010.7	VPT1	Major Facilitator Superfamily with SPX (SYG1/Pho81/XPR1) domain-containing protein
		Zm00001d031614	-	-1.49271	AT5G50380.1	EXO70F1	exocyst subunit exo70 family protein F1
		Zm00001d031875	1.62145	-2.33553	AT3G54700.2	PHT1;7	phosphate transporter 1%3B7
		Zm00001d032291	-	1.06745	AT4G39700.1	AT4G39700	Heavy metal transport/detoxification superfamily protein
		Zm00001d032850	1.50561	-1.26366	AT2G38940.1	PHT1;4	phosphate transporter 1%3B4
		Zm00001d038059	1.18985	1.14827	AT1G67930.1	COG5	Golgi transport complex protein-like protein
		Zm00001d044951	-	-1.79128	AT1G21890.1	UMAMIT19	nodulin MtN21 /EamA-like transporter family protein
		Zm00001d052269	-	1.32538	AT1G73590.1	PIN1	Auxin efflux carrier family protein
	catabolic process	Zm00001d002736	-	1.571	AT2G44990.3	CCD7	carotenoid cleavage dioxygenase 7
		Zm00001d004804	-	1.05636	AT4G09510.1	CINV2	cytosolic invertase 2
		Zm00001d006330	-	1.10645	AT3G59080.1	AT3G59080	Eukaryotic aspartyl protease family protein
		Zm00001d027996	-	1.03954	AT5G42250.1	AT5G42250	Zinc-binding alcohol dehydrogenase family protein
		Zm00001d036370	-	-1.36876	AT3G12500.1	CHIB	basic chitinase
		Zm00001d037656	-	-2.11173	AT5G24090.1	CHIA	chitinase A
		Zm00001d038151	1.33504	-1.68229	AT1G03220.1	SAP2	Eukaryotic aspartyl protease family protein
		Zm00001d040166	-	1.07632	AT3G48190.2	ATM	Serine/Threonine-kinase ATM-like protein
		Zm00001d043674	-	-1.24401	AT2G19570.1	CDA1	cytidine deaminase 1
	oxidation reduction	Zm00001d002261	-	1.19862	AT4G18360.4	GOX3	Aldolase-type TIM barrel family protein
		Zm00001d006069	-	-3.06373	AT4G13010.1	CeQORH	Oxidoreductase%2C zinc-binding dehydrogenase family protein
		Zm00001d020794	-	-1.07041	AT1G72230.1	AT1G72230	Cupredoxin superfamily protein
		Zm00001d026056	-	-1.01771	AT4G25700.1	BETA-OHASE 1	beta-hydroxylase 1
		Zm00001d031449	-	-2.26044	AT3G45140.1	LOX2	lipoxygenase 2
		Zm00001d042868	-	1.18307	AT2G37770.2	ChlAKR	NAD(P)-linked oxidoreductase superfamily protein
		Zm00001d044157	1.82751	-1.87585	AT3G14690.2	CYP72A15	cytochrome P450%2C family 72%2C subfamily A%2C polypeptide 15
		Zm00001d044908	-	-1.32139	AT1G76680.1	OPR1	12-oxophytodienoate reductase 1
		Zm00001d045145	-	1.28033	AT5G20400.1	AT5G20400	2-oxoglutarate (2OG) and Fe(II)-dependent oxygenase superfamily protein
	ABC transporters	Zm00001d026426	-	-1.85047	AT3G28860.1	ABCB19	ATP binding cassette subfamily B19
		Zm00001d051514	-	4.01814	AT4G25960.1	ABCB2	P-glycoprotein 2
	Phagosome	Zm00001d052273	1.78343	1.00393	AT5G62880.2	RAC10	RAC-like 10
	Endocytosis	Zm00001d023218	1.25695	1.05829	AT3G11130.1	CHC1	Clathrin%2C heavy chain
		Zm00001d052308	1.39365	1.01876	AT3G11130.1	CHC1	Clathrin%2C heavy chain
	Metabolic pathways	Zm00001d019139	-	1.15044	AT5G13710.2	SMT1	sterol methyltransferase 1
		Zm00001d043621	-	-1.48352	AT1G73010.1	PS2	inorganic pyrophosphatase 1
C vs 5D	localization	Zm00001d032291	1.0538	-	AT4G39700.1		Heavy metal transport/detoxification superfamily protein
		Zm00001d020925	1.77158	-	AT5G13070.1		MSF1-like family protein
		Zm00001d038059	1.62989	-	AT1G67930.1	COG5	Golgi transport complex protein-like protein
		Zm00001d031614	1.53103	-	AT5G50380.1	EXO70F1	exocyst subunit exo70 family protein F1
		Zm00001d032850	3.60978	-	AT2G38940.1	PHT1;4	phosphate transporter 1%3B4
		Zm00001d031875	1.6786	-	AT3G54700.2	PHT1;7	phosphate transporter 1%3B7
		Zm00001d002614	1.76826	-	AT1G63010.7	PHT5	Major Facilitator Superfamily with SPX (SYG1/Pho81/XPR1) domain-containing protein
		Zm00001d026070	3.42516	-	AT1G63010.7	PHT5	Major Facilitator Superfamily with SPX (SYG1/Pho81/XPR1) domain-containing protein
		Zm00001d052269	2.63652	-	AT1G73590.1	PIN1	Auxin efflux carrier family protein
		Zm00001d008242	1.03584	-	AT3G20000.1	TOM40	translocase of the outer mitochondrial membrane 40
		Zm00001d044951	1.05938	-	AT1G21890.1	UMAMIT19	nodulin MtN21 /EamA-like transporter family protein
	catabolic process	Zm00001d002736	1.34863	-	AT2G44990.3	CCD7	carotenoid cleavage dioxygenase 7
		Zm00001d004804	1.39811	-	AT4G09510.1	A/N-INVI	ALKALINE/NEUTRAL INVERTASE I
		Zm00001d006330	1.26246	-	AT1G03220.1	SAP2	Eukaryotic aspartyl protease family protein
		Zm00001d038151	1.2304	-	AT1G03220.1	SAP2	Eukaryotic aspartyl protease family protein
		Zm00001d036370	2.21248	-	AT3G12500.1	CHIB	basic chitinase
		Zm00001d037656	2.29339	-	AT5G24090.1	CHIA	chitinase A
		Zm00001d040166	1.10122	-	AT3G48190.2	ATM	Serine/Threonine-kinase ATM-like protein
		Zm00001d027996	1.64804	-	AT5G42250.1	AT5G42250	Zinc-binding alcohol dehydrogenase family protein
		Zm00001d043674	1.19831	-	AT2G19570.1	CDA1	cytidine deaminase 1
	oxidation reduction	Zm00001d002261	1.52586	-	AT4G18360.4	GOX3	Aldolase-type TIM barrel family protein
		Zm00001d006069	1.63099	-	AT4G13010.1	CeQORH	Oxidoreductase%2C zinc-binding dehydrogenase family protein
		Zm00001d020794	1.27727	-	AT1G72230.1	AT1G72230	Cupredoxin superfamily protein
		Zm00001d026056	2.1844	-	AT4G25700.1	BETA-OHASE 1	beta-hydroxylase 1
		Zm00001d031449	1.50962	-	AT3G45140.1	LOX2	lipoxygenase 2
		Zm00001d042868	1.24007	-	AT2G37770.2	ChlAKR	NAD(P)-linked oxidoreductase superfamily protein
		Zm00001d044157	2.62772	-	AT3G14690.2	CYP72A15	cytochrome P450%2C family 72%2C subfamily A%2C polypeptide 15
		Zm00001d044908	2.85701	-	AT1G76680.1	OPR1	12-oxophytodienoate reductase 1
		Zm00001d045145	1.39909	-	AT5G20400.1	AT5G20400	2-oxoglutarate (2OG) and Fe(II)-dependent oxygenase superfamily protein
	ABC transporters	Zm00001d026426	1.60982	-	AT3G28860.1	ABCB19	ATP binding cassette subfamily B19
		Zm00001d051514	2.06507	-	AT4G25960.1	ABCB2	P-glycoprotein 2
	Phagosome	Zm00001d052273	1.9785	-	AT5G62880.2	RAC10	RAC-like 10
	Endocytosis	Zm00001d023218	1.57723	-	AT3G11130.1	CHC1	Clathrin%2C heavy chain
		Zm00001d052308	1.39099	-	AT3G11130.1	CHC1	Clathrin%2C heavy chain
	Metabolic pathways	Zm00001d019139	1.00803	-	AT5G13710.2	SMT1	sterol methyltransferase 1
		Zm00001d043621	2.33792	-	AT1G73010.1	PS2	inorganic pyrophosphatase 1
