# Supplementary material for: Transcriptome Analysis of Tolerant and Susceptible Maize Genotypes Reveals Novel Insights about the Molecular Mechanisms Underlying Drought Responses in Leaves
Source: Int J Mol Sci. 2021 Jun 29;22(13):6980. doi: 10.3390/ijms22136980 (PMC8268334; doi:10.3390/ijms22136980)
Supplement: Supplementary file 1 [file ijms-22-06980-s001.zip › Supplementary Tables/Table S7.xlsx]

## Sheet: Table S7
Table S7: Drought responsive genes down-regulated in CML69 with no changes observed in LX9801 after 5D of drought stress treatment. The extent of differential expression is measured in terms of log2 Fold Change and hyphen (-) indicates failure to meet the significance cut off or undetected. Values in red and blue indicate the log2 Fold Change increases or decreases in the drought-stressed seedlin…
Stress stage	GO/KEGG	gene	CML69(log2FoldChange)	LX9801(log2FoldChange)	Best-hit-A.th	Arabi-symbol	Annotation
C vs 3D	oxidation reduction	Zm00001d002564	-2.46139	-3.45576	AT4G10500.1	DLO1	2-oxoglutarate (2OG) and Fe(II)-dependent oxygenase superfamily protein
		Zm00001d003086	-	-1.24089	AT1G06690.1	AT1G06690	NAD(P)-linked oxidoreductase superfamily protein
		Zm00001d004555	-	-3.21038	AT5G06900.1	CYP93D1	cytochrome P450%2C family 93%2C subfamily D%2C polypeptide 1
		Zm00001d014204	-1.11223	-3.20611	AT4G09670.1	AT4G09670	Oxidoreductase family protein
		Zm00001d016182	-1.6495	-1.22853	AT5G05340.1	PRX52	Peroxidase superfamily protein
		Zm00001d024281	-	-1.01673	AT5G13700.1	PAO1	polyamine oxidase 1
		Zm00001d030090	-	-1.02612	AT2G23910.1	AT2G23910	NAD(P)-binding Rossmann-fold superfamily protein
		Zm00001d031659	-1.23109	-1.08021	AT5G50850.1	MAB1	Transketolase family protein
		Zm00001d037103	-	-1.29273	AT3G26060.1	PRXQ	Thioredoxin superfamily protein
		Zm00001d040399	-	-1.14183	AT2G39040.1	AT2G39040	Peroxidase superfamily protein
		Zm00001d044267	-1.05668	-1.01432	AT3G25530.1	GLYR1	glyoxylate reductase 1
		Zm00001d046490	-1.16906	-1.5329	AT5G17000.1	AT5G17000	Zinc-binding dehydrogenase family protein
		Zm00001d052530	-	-2.32725	AT2G27690.1	CYP94C1	cytochrome P450%2C family 94%2C subfamily C%2C polypeptide 1
		Zm00001d054044	-	-1.07068	AT1G20630.1	CAT1	catalase 1
	catabolic process	Zm00001d014025	-	-1.2463	AT4G35220.1	CYCLASE2	Cyclase family protein
		Zm00001d023341	-	-1.14042	AT3G10910.1	DAFL1	RING/U-box superfamily protein
		Zm00001d027685	-	-1.46242	AT1G23980.1	AT1G23980	RING/U-box superfamily protein
		Zm00001d032501	-	-1.55936	AT1G11190.1	BFN1	bifunctional nuclease i
		Zm00001d043864	-	-1.45295	AT3G12700.1	NANA	Eukaryotic aspartyl protease family protein
		Zm00001d052233	-	-1.03646	AT1G22170.2	AT1G22170	Phosphoglycerate mutase family protein
	response to inorganic substance	Zm00001d044099	-	-1.25795	AT3G01500.2	BCA1	beta carbonic anhydrase 1
		Zm00001d051746	-	-1.15549	AT5G23060.1	CaS	calcium sensing receptor
	Phenylpropanoid biosynthesis	Zm00001d039956	-	-1.01703	AT5G48930.1	HCT	hydroxycinnamoyl-CoA shikimate/quinate hydroxycinnamoyl transferase
	Peroxisome	Zm00001d021770	-1.67699	-1.60593	AT1G15690.1	AVP1	Inorganic H pyrophosphatase family protein
		Zm00001d031908	-	-1.61408	AT2G28190.1	CSD2	copper/zinc superoxide dismutase 2
	Others	Zm00001d035034	-	-1.07702	AT5G47840.1	AMK2	adenosine monophosphate kinase
		Zm00001d045138	-	-1.28498	AT5G34940.2	GUS3	glucuronidase 3
		Zm00001d028241	-1.10227	-1.57854	AT1G68530.1	KCS6	3-ketoacyl-CoA synthase 6
C vs 5D	oxidation reduction	Zm00001d016182	-1.9509	-	AT5G05340.1	PRX52	Peroxidase superfamily protein
		Zm00001d040399	-1.36384	-	AT2G39040.1	PRX	Peroxidase superfamily protein
		Zm00001d037103	-1.33815	-	AT3G26060.1	PRXQ	Thioredoxin superfamily protein
		Zm00001d054044	-1.30677	-	AT1G20630.1	CAT1	catalase 1
		Zm00001d031908	-1.24617	-	AT2G28190.1	SOD2	superoxide dismutase 2
		Zm00001d004555	-1.07574	-	AT5G06900.1	CYP93D1	cytochrome P450%2C family 93%2C subfamily D%2C polypeptide 1
		Zm00001d052530	-2.29659	-	AT2G27690.1	CYP94C1	cytochrome P450%2C family 94%2C subfamily C%2C polypeptide 1
		Zm00001d002564	-2.76667	-	AT4G10500.1	DMR6	DMR6-LIKE OXYGENASE 1
		Zm00001d003086	-1.10522	-	AT1G06690.1	AT1G06690	NAD(P)-linked oxidoreductase superfamily protein
		Zm00001d014204	-3.63251	-	AT4G09670.1	AT4G09670	Oxidoreductase family protein
		Zm00001d024281	-1.56086	-	AT5G13700.1	PAO1	polyamine oxidase 1
		Zm00001d030090	-1.01898	-	AT2G23910.1	AT2G23910	NAD(P)-binding Rossmann-fold superfamily protein
		Zm00001d031659	-1.96012	-	AT5G50850.1	MAB1	Transketolase family protein
		Zm00001d044267	-1.37189	-	AT3G25530.1	GLYR1	glyoxylate reductase 1
		Zm00001d046490	-2.15888	-	AT5G17000.1	AT5G17000	Zinc-binding dehydrogenase family protein
	catabolic process	Zm00001d014025	-1.703	-	AT4G35220.1	CYCLASE2	Cyclase family protein
		Zm00001d023341	-2.07214	-	AT3G10910.1	DAFL1	RING/U-box superfamily protein
		Zm00001d027685	-1.94813	-	AT1G23980.1	AT1G23980	RING/U-box superfamily protein
		Zm00001d032501	-1.49937	-	AT1G11190.1	BFN1	bifunctional nuclease i
		Zm00001d043864	-1.52959	-	AT3G12700.1	NANA	Eukaryotic aspartyl protease family protein
		Zm00001d052233	-1.01106	-	AT1G22170.2	AT1G22170	Phosphoglycerate mutase family protein
	response to inorganic substance	Zm00001d044099	-1.33478	-	AT3G01500.2	BCA1	beta carbonic anhydrase 1
		Zm00001d051746	-1.10769	-	AT5G23060.1	CaS	calcium sensing receptor
	Phenylpropanoid biosynthesis	Zm00001d039956	-1.17635	-	AT5G48930.1	HCT	hydroxycinnamoyl-CoA shikimate/quinate hydroxycinnamoyl transferase
	Peroxisome	Zm00001d021770	-1.22211	-	AT1G15690.1	AVP1	Inorganic H pyrophosphatase family protein
	others	Zm00001d035034	-1.05936	-	AT5G47840.1	AMK2	adenosine monophosphate kinase
		Zm00001d045138	-2.05764	-	AT5G34940.2	GUS3	glucuronidase 3
		Zm00001d028241	-1.63209	-	AT1G68530.1	KCS6	3-ketoacyl-CoA synthase 6
