# Supplementary material for: Transcriptome Analysis of Tolerant and Susceptible Maize Genotypes Reveals Novel Insights about the Molecular Mechanisms Underlying Drought Responses in Leaves
Source: Int J Mol Sci. 2021 Jun 29;22(13):6980. doi: 10.3390/ijms22136980 (PMC8268334; doi:10.3390/ijms22136980)
Supplement: Supplementary file 1 [file ijms-22-06980-s001.zip › Supplementary Tables/Table S8.xlsx]

## Sheet: Table S8
Table S8: Drought responsive genes up-regulated in LX9801 with no changes observed in CML69 after 3D of drought stress treatment. The extent of differential expression is measured in terms of log2 Fold Change and hyphen (-) indicates failure to meet the significance cut off or undetected. Values in red and blue indicate the log2 Fold Change increases or decreases in the drought-stressed seedlings…
Stress stage	GO/KEGG	gene	CML69(log2FoldChange)	LX9801(log2FoldChange)	Best-hit-A.th	Arabi-symbol	Annotation
C vs 3D	carbohydrate catabolic process	Zm00001d004804	-	1.05636	AT4G09510.1	A/N-INVI	neutral/alkaline invertase
		Zm00001d051666	-	1.46321	AT4G09510.1	A/N-INVI	neutral/alkaline invertase
		Zm00001d027619	-	1.40817	AT3G23920.1	BAM1	beta-amylase 1
		Zm00001d005052	-	3.11548	AT5G01930.1	MAN6	mannan endo-1,4-beta-mannosidase
		Zm00001d034723	-	9.90437	AT5G66460.1	MAN7	ENDO-BETA-MANNASE 7
		Zm00001d020371	-	2.11715	AT2G32990.1	GH9B8	glycosyl hydrolase 9B8
		Zm00001d029151	-	1.19394	AT4G23920.1	UGE2	UDP-glucose-4-epimerase
		Zm00001d040166	-	1.07632	AT3G48190.2	ATM	ATAXIA-TELANGIECTASIA MUTATED
		Zm00001d048988	-	1.32328	AT5G49900.3	GBA2	Beta-glucosidase, GBA2 type family protein
		Zm00001d001831	-	1.67647	AT5G08570.3		Pyruvate kinase family protein
	cellular lipid metabolic process	Zm00001d002736	-	1.571	AT2G44990.3	CCD7	carotenoid cleavage dioxygenase 7
		Zm00001d011193	-	2.18243	AT5G35460.2	AT5G35460	membrane protein
		Zm00001d045660	-	1.99799	AT1G25450.1	KCS5	3-ketoacyl-CoA synthase 5
	cellular response to chemical stimulus	Zm00001d006677	-	1.18883	AT1G19350.6	BES1	Brassinosteroid signaling positive regulator (BZR1) family protein
		Zm00001d030021	-	1.46194	AT5G46570.1	BSK2	BR-signaling kinase 2
		Zm00001d039346	-	3.35797	AT2G46370.4	JAR1	Auxin-responsive GH3 family protein
		Zm00001d052269	-	1.32538	AT1G73590.1	PIN1	Auxin efflux carrier family protein
		Zm00001d028814	-	2.08294	AT2G40330.1	PYL6	PYR1-like 6
		Zm00001d038165	-	1.12533	AT5G27320.1	GID1C	GA INSENSITIVE DWARF1C
		Zm00001d003271	-	1.29645	AT5G61640.1	PMSR1	peptidemethionine sulfoxide reductase 1
		Zm00001d006036	-	1.17159	AT5G09590.1	MTHSC70-2	mitochondrial HSO70 2
		Zm00001d006286	-	1.06333	AT2G17110.1	AT2G17110	DNA-directed RNA polymerase subunit beta%2C putative (DUF630 and DUF632)
		Zm00001d022560	-	1.03844	AT5G26860.1	LON1	lon protease 1
		Zm00001d022598	-	1.21164	AT1G21740.1	AT1G21740	DUF630 family protein%2C putative (DUF630 and DUF632)
		Zm00001d027512	-	1.20504	AT5G39740.2	RPL5B	ribosomal protein L5 B
		Zm00001d042922	-	1.87447	AT5G02500.1	HSC70-1	heat shock cognate protein 70-1
		Zm00001d043505	-	1.47183	AT3G16360.2	AHP4	HPT phosphotransmitter 4
	cellular amino acid and derivative metabolic process	Zm00001d016441	-	1.34146	AT5G36160.1	TAT2	Tyrosine transaminase family protein
		Zm00001d043382	-	1.03329	AT5G11520.1	ASP3	aspartate aminotransferase
		Zm00001d045470	-	1.13422	AT4G34710.2	ADC2	arginine decarboxylase
		Zm00001d031749	-	1.87768	AT5G17330.1	GAD	glutamate decarboxylase
		Zm00001d051056	-	1.05647	AT3G25570.2	SAMDC3	S-adenosylmethionine decarboxylase
		Zm00001d002051	-	1.37611	AT4G34200.1	PGDH	D-3-phosphoglycerate dehydrogenase
		Zm00001d027861	-	1.31743	AT4G39660.1	AGT2	alanine:glyoxylate aminotransferase 2
		Zm00001d028750	-	3.05725	AT3G47340.1	ASN1	glutamine-dependent asparagine synthase 1
		Zm00001d050694	-	2.47034	AT1G43710.1	SDC1	SERINE DECARBOXYLASE 1
		Zm00001d006467	-	1.42573	AT4G21990.1	APR3,	APS reductase 3
		Zm00001d028599	-	2.49979	AT5G60020.1	LAC17	laccase 17
		Zm00001d029708	-	1.42564	AT1G10370.1	ERD9	Glutathione S-transferase family protein
		Zm00001d043174	-	1.09782	AT2G40890.1	CYP98A3	cytochrome P450%2C family 98%2C subfamily A%2C polypeptide 3
		Zm00001d048561	-	1.08813	AT2G27820.1	PD1	prephenate dehydratase 1
	catabolic process	Zm00001d006330	-	1.10645	AT3G59080.1	AT3G59080	Eukaryotic aspartyl protease family protein
		Zm00001d016373	-	1.11872	AT4G33090.1	APM1	aminopeptidase M1
		Zm00001d024252	-	1.57975	AT4G05460.1	SKIP19	RNI-like superfamily protein
		Zm00001d025859	-	1.18835	AT3G25400.1	AT3G25400	dCTP pyrophosphatase-like protein
		Zm00001d027656	-	1.3265	AT3G44880.1	ACD1	Pheophorbide a oxygenase family protein with Rieske 2Fe-2S domain-containing protein
		Zm00001d044966	-	2.0955	AT2G03200.1	ASPR1	Eukaryotic aspartyl protease family protein
		Zm00001d050606	-	1.06822	AT5G07350.2	Tudor1	TUDOR-SN protein 1
		Zm00001d051501	-	2.76822	AT1G76410.1	ATL8	RING/U-box superfamily protein
		Zm00001d052237	-	1.60353	AT5G10080.1	AT5G10080	Eukaryotic aspartyl protease family protein
	oxidation reduction	Zm00001d003140	-	1.26287	AT3G48310.1	CYP71A22	cytochrome P450%2C family 71%2C subfamily A%2C polypeptide 22
		Zm00001d003181	-	1.47029	AT3G07570.1	AT3G07570	Cytochrome b561/ferric reductase transmembrane with DOMON related domain-containing protein
		Zm00001d006437	-	1.0069	AT4G04950.1	GRXS17	thioredoxin family protein
		Zm00001d011428	-	1.02874	AT5G40850.1	UPM1	urophorphyrin methylase 1
		Zm00001d013038	-	9.57024	AT5G26330.1	AT5G26330	Cupredoxin superfamily protein
		Zm00001d014463	-	2.81025	AT3G20570.1	ENODL9	early nodulin-like protein 9
		Zm00001d015404	-	2.03376	AT1G79440.1	ALDH5F1	aldehyde dehydrogenase 5F1
		Zm00001d020673	-	1.19422	AT2G45550.1	CYP76C4	cytochrome P450%2C family 76%2C subfamily C%2C polypeptide 4
		Zm00001d020717	-	1.44811	AT3G19270.2	CYP707A4	cytochrome P450%2C family 707%2C subfamily A%2C polypeptide 4
		Zm00001d025533	-	1.17526	AT1G59960.1	AT1G59960	NAD(P)-linked oxidoreductase superfamily protein
		Zm00001d025761	-	2.00655	AT3G59710.3	AT3G59710	NAD(P)-binding Rossmann-fold superfamily protein
		Zm00001d027601	-	3.33054	AT4G39490.1	CYP96A10	cytochrome P450%2C family 96%2C subfamily A%2C polypeptide 10
		Zm00001d033623	-	1.28947	AT1G55020.1	LOX1	lipoxygenase 1
		Zm00001d034118	-	1.75859	AT2G22330.1	CYP79B3	cytochrome P450%2C family 79%2C subfamily B%2C polypeptide 3
		Zm00001d042868	-	1.18307	AT2G37770.2	ChlAKR	NAD(P)-linked oxidoreductase superfamily protein
		Zm00001d043293	-	2.72099	AT1G75450.1	CKX5	cytokinin oxidase 5
		Zm00001d044339	-	1.25782	AT3G24503.1	ALDH2C4	aldehyde dehydrogenase 2C4
		Zm00001d045063	-	1.24951	AT2G46950.1	CYP709B2	cytochrome P450%2C family 709%2C subfamily B%2C polypeptide 2
		Zm00001d045145	-	1.28033	AT5G20400.1	AT5G20400	2-oxoglutarate (2OG) and Fe(II)-dependent oxygenase superfamily protein
		Zm00001d045649	-	1.52275	AT3G27060.1	TSO2	Ferritin/ribonucleotide reductase-like family protein
		Zm00001d047418	-	1.87842	AT2G46950.1	CYP709B2	cytochrome P450%2C family 709%2C subfamily B%2C polypeptide 2
		Zm00001d049597	-	1.14321	AT4G05020.1	NDB2	NAD(P)H dehydrogenase B2
	cellular carbohydrate metabolic process	Zm00001d007327	-	2.62812	AT1G67330.1	AGM2	Arabinogalactan methylesterase
		Zm00001d009997	-	1.01533	AT2G26100.1	AT2G26100	Galactosyltransferase family protein
		Zm00001d024386	-	1.6346	AT4G25810.1	XTR6	xyloglucan endotransglycosylase-related protein
		Zm00001d031415	-	1.25552	AT5G55500.1	XYLT	beta-1,2-xylosyltransferase
		Zm00001d037234	-	1.14886	AT3G01180.1	SS2	starch synthase 2
		Zm00001d042536	-	1.59725	AT1G06030.1	FRK2	fructokinase gene family
		Zm00001d047994	-	1.05197	AT4G08170.1	ITPK3	Inositol 1,3,4-trisphosphate 5/6-kinase family protein
		Zm00001d050125	-	1.58391	AT5G20280.1	SPS	sucrose phosphate synthase 1F
	signaling	Zm00001d005051	-	1.53555	AT2G30520.1	RPT2	Phototropic-responsive NPH3 family protein
		Zm00001d010743	-	1.21572	AT4G18700.1	CIPK12	CBL-interacting protein kinase 12
		Zm00001d011520	-	1.03595	AT1G56720.4	PK	Protein kinase superfamily protein
		Zm00001d017604	-	1.36564	AT2G46710.1	ROPGAP3	Rop guanosine triphosphatase (GTPASE)-activating protein 3
		Zm00001d022069	-	2.26981	AT3G29575.4	AFP3	ABI five binding protein 3
		Zm00001d032155	-	1.04384	AT4G30960.1	CIPK6	CBL-interacting protein kinase 6
		Zm00001d039596	-	1.03909	AT3G24495.1	MSH7	MUTS homolog 7
		Zm00001d047990	-	1.69924	AT4G34500.1	PK	Protein kinase superfamily protein
		Zm00001d048222	-	1.78824	AT5G65270.1	RABA4a	RAB GTPase homolog A4A
	response to hormone stimulus	Zm00001d022264	-	1.14774	AT3G05880.1	RCI2A	Low temperature and salt responsive protein family
		Zm00001d034807	-	1.39055	AT2G44060.2	LEA26	Late embryogenesis abundant protein%2C group 2
		Zm00001d039685	-	2.54867	AT5G40390.1	SIP1	Raffinose synthase family protein
	cellular response to stress	Zm00001d012145	-	1.19517	AT2G19490.1	RECA2	recA DNA recombination family protein
		Zm00001d042640	-	1.47656	AT1G71310.2	RAD52-1	cobalt ion binding protein
	Glycerophospholipid metabolism	Zm00001d039670	-	1.06018	AT3G15730.1	PLD	phospholipase D1/2
		Zm00001d022594	-	1.41262	AT4G35790.2	PLD	phospholipase D1/2
		Zm00001d023979	-	1.39388	AT5G63770.2	DGK2	diacylglycerol kinase (ATP)
		Zm00001d043263	-	1.81618	AT2G20900.3	DGK5	diacylglycerol kinase (ATP)
		Zm00001d047763	-	1.34395	AT2G39290.1	PGP1	phosphatidylglycerolphosphate synthase 1
		Zm00001d028698	-	1.0072	AT2G39290.1	PGP1	phosphatidylglycerolphosphate synthase
		Zm00001d015399	-	1.19892	AT2G32260.1	CCT1	choline-phosphate cytidylyltransferase
		Zm00001d005035	-	1.3303	AT2G38670.1	PECT1	ethanolamine-phosphate cytidylyltransferase
		Zm00001d009497	-	2.15689	AT1G15110.4	PSS1	phosphatidylserine synthase 2
		Zm00001d012567	-	1.5438	AT2G41540.4	GPDHC1	glycerol-3-phosphate dehydrogenase (NAD+)
	Benzoxazinoid biosynthesis	Zm00001d048702	-	1.69293		bx3	indolin-2-one monooxygenase
		Zm00001d048709	-	2.75855		bx1	indole-3-glycerol-phosphate lyase
		Zm00001d048710	-	2.29567		bx2	indole-2-monooxygenase
	Fatty acid degradation	Zm00001d005019	-	1.06343	AT2G04350.2	LACS8	long-chain acyl-CoA synthetase
		Zm00001d034832	-	1.05704	AT2G04350.2	LACS	long-chain acyl-CoA synthetase
		Zm00001d005818	-	1.23036	AT1G54100.2	ALDH7B4	aldehyde dehydrogenase 7B4
		Zm00001d027996	-	1.03954	AT5G42250.1	AT5G42250	Zinc-binding alcohol dehydrogenase family protein
	Butanoate metabolism	Zm00001d012590	-	1.20955	AT3G15290		3-hydroxyacyl-CoA dehydrogenase family protein
	Pyruvate metabolism	Zm00001d016166	-	1.16152	AT3G14940.2	PEPC	phosphoenolpyruvate carboxylase 3
		Zm00001d043601	-	1.59096	AT5G25880.1	NADP-ME3	NADP-malic enzyme 3
		Zm00001d049049	-	1.92192	AT2G36580.1	PK	Pyruvate kinase family protein
	Diterpenoid biosynthesis	Zm00001d037724	-	2.26561	AT1G78440.1	ATGA2OX1	gibberellin 2-beta-dioxygenase
		Zm00001d039634	-	1.55847	AT1G15550.1	GA3OX1	gibberellin 3-oxidase 1
	Cutin, suberine and wax biosynthesis	Zm00001d044730	-	1.22846	AT1G70670.1	CLO4	Caleosin-related family protein
		Zm00001d014055	-	1.35262	AT1G02205.2	CER1	Fatty acid hydroxylase superfamily
	Peroxisome	Zm00001d002261	-	1.19862	AT4G18360.4	GOX3	GLYCOLATE OXIDASE 3
	Others	Zm00001d019139	-	1.15044	AT5G13710.2	SMT1	sterol methyltransferase 1
C vs 5D	carbohydrate catabolic process	Zm00001d004804	1.39811	-	AT4G09510.1	A/N-INVI	neutral/alkaline invertase
		Zm00001d051666	1.09294	2.4152	AT4G09510.1	A/N-INVI	neutral/alkaline invertase
		Zm00001d027619	1.47988	2.78166	AT3G23920.1	BAM1	beta-amylase 1
		Zm00001d005052	10.1946	4.065	AT5G01930.1	MAN6	mannan endo-1,4-beta-mannosidase
		Zm00001d034723	13.9663	13.6011	AT5G66460.1	MAN7	ENDO-BETA-MANNASE 7
		Zm00001d020371	1.05377	2.52097	AT2G32990.1	GH9B8	glycosyl hydrolase 9B8
		Zm00001d029151	2.02693	1.36558	AT4G23920.1	UGE2	UDP-glucose-4-epimerase
		Zm00001d040166	1.10122	-	AT3G48190.2	ATM	ATAXIA-TELANGIECTASIA MUTATED
		Zm00001d048988	1.02712	1.40556	AT5G49900.3	GBA2	Beta-glucosidase, GBA2 type family protein
		Zm00001d001831	1.4209	2.06814	AT5G08570.3		Pyruvate kinase family protein
	cellular lipid metabolic process	Zm00001d002736	1.34863	-	AT2G44990.3	CCD7	carotenoid cleavage dioxygenase 7
		Zm00001d011193	1.47188	2.88502	AT5G35460.2	AT5G35460	membrane protein
		Zm00001d045660	2.9253	2.47068	AT1G25450.1	KCS5	3-ketoacyl-CoA synthase 5
	cellular response to chemical stimulus	Zm00001d006677	2.03034	1.32258	AT1G19350.6	BES1	Brassinosteroid signaling positive regulator (BZR1) family protein
		Zm00001d030021	1.25945	1.91932	AT5G46570.1	BSK2	BR-signaling kinase 2
		Zm00001d039346	2.51836	3.72233	AT2G46370.4	JAR1	Auxin-responsive GH3 family protein
		Zm00001d052269	2.63652	-	AT1G73590.1	PIN1	Auxin efflux carrier family protein
		Zm00001d028814	3.66953	3.57548	AT2G40330.1	PYL6	PYR1-like 6
		Zm00001d038165	1.02181	1.64667	AT5G27320.1	GID1C	GA INSENSITIVE DWARF1C
		Zm00001d003271	1.17586	1.32532	AT5G61640.1	PMSR1	peptidemethionine sulfoxide reductase 1
		Zm00001d006036	1.30313	1.36006	AT5G09590.1	MTHSC70-2	mitochondrial HSO70 2
		Zm00001d006286	1.12503	-	AT2G17110.1	AT2G17110	DNA-directed RNA polymerase subunit beta%2C putative (DUF630 and DUF632)
		Zm00001d022560	1.02458	1.09288	AT5G26860.1	LON1	lon protease 1
		Zm00001d022598	1.17602	-	AT1G21740.1	AT1G21740	DUF630 family protein%2C putative (DUF630 and DUF632)
		Zm00001d027512	1.45006	1.20459	AT5G39740.2	RPL5B	ribosomal protein L5 B
		Zm00001d042922	5.00649	3.9174	AT5G02500.1	HSC70-1	heat shock cognate protein 70-1
		Zm00001d043505	1.06769	1.62839	AT3G16360.2	AHP4	HPT phosphotransmitter 4
	cellular amino acid and derivative metabolic process	Zm00001d016441	2.50869	2.20994	AT5G36160.1	TAT2	Tyrosine transaminase family protein
		Zm00001d043382	1.72518	1.48063	AT5G11520.1	ASP3	aspartate aminotransferase
		Zm00001d045470	1.21027	1.22793	AT4G34710.2	ADC2	arginine decarboxylase
		Zm00001d031749	1.13218	1.91237	AT5G17330.1	GAD	glutamate decarboxylase
		Zm00001d051056	1.59187	1.56901	AT3G25570.2	SAMDC3	S-adenosylmethionine decarboxylase
		Zm00001d002051	1.23974	1.76375	AT4G34200.1	PGDH	D-3-phosphoglycerate dehydrogenase
		Zm00001d027861	-1.42261	1.72967	AT4G39660.1	AGT2	alanine:glyoxylate aminotransferase 2
		Zm00001d028750	2.30478	6.81915	AT3G47340.1	ASN1	glutamine-dependent asparagine synthase 1
		Zm00001d050694	-1.05229	2.30336	AT1G43710.1	SDC1	SERINE DECARBOXYLASE 1
		Zm00001d006467	1.38404	1.01457	AT4G21990.1	APR3,	APS reductase 3
		Zm00001d028599	4.64688	6.32546	AT5G60020.1	LAC17	laccase 17
		Zm00001d029708	3.70091	4.04866	AT1G10370.1	ERD9	Glutathione S-transferase family protein
		Zm00001d043174	1.32859	2.78023	AT2G40890.1	CYP98A3	cytochrome P450%2C family 98%2C subfamily A%2C polypeptide 3
		Zm00001d048561	1.20536	1.86865	AT2G27820.1	PD1	prephenate dehydratase 1
	catabolic process	Zm00001d006330	1.26246	-	AT3G59080.1	AT3G59080	Eukaryotic aspartyl protease family protein
		Zm00001d016373	1.40272	1.07524	AT4G33090.1	APM1	aminopeptidase M1
		Zm00001d024252	1.53994	1.6978	AT4G05460.1	SKIP19	RNI-like superfamily protein
		Zm00001d025859	1.16962	1.11119	AT3G25400.1	AT3G25400	dCTP pyrophosphatase-like protein
		Zm00001d027656	2.24957	1.74431	AT3G44880.1	ACD1	Pheophorbide a oxygenase family protein with Rieske 2Fe-2S domain-containing protein
		Zm00001d044966	1.8065	4.27115	AT2G03200.1	ASPR1	Eukaryotic aspartyl protease family protein
		Zm00001d050606	1.20092	1.01854	AT5G07350.2	Tudor1	TUDOR-SN protein 1
		Zm00001d051501	1.89288	4.21567	AT1G76410.1	ATL8	RING/U-box superfamily protein
		Zm00001d052237	1.33343	1.54743	AT5G10080.1	AT5G10080	Eukaryotic aspartyl protease family protein
	oxidation reduction	Zm00001d003140	2.22285	2.73202	AT3G48310.1	CYP71A22	cytochrome P450%2C family 71%2C subfamily A%2C polypeptide 22
		Zm00001d003181	1.33184	1.66251	AT3G07570.1	AT3G07570	Cytochrome b561/ferric reductase transmembrane with DOMON related domain-containing protein
		Zm00001d006437	1.89673	1.54108	AT4G04950.1	GRXS17	thioredoxin family protein
		Zm00001d011428	1.32532	1.8625	AT5G40850.1	UPM1	urophorphyrin methylase 1
		Zm00001d013038	9.88855	11.9498	AT5G26330.1	AT5G26330	Cupredoxin superfamily protein
		Zm00001d014463	6.82062	4.84748	AT3G20570.1	ENODL9	early nodulin-like protein 9
		Zm00001d015404	1.28996	1.61649	AT1G79440.1	ALDH5F1	aldehyde dehydrogenase 5F1
		Zm00001d020673	2.48735	1.90798	AT2G45550.1	CYP76C4	cytochrome P450%2C family 76%2C subfamily C%2C polypeptide 4
		Zm00001d020717	1.80172	2.41562	AT3G19270.2	CYP707A4	cytochrome P450%2C family 707%2C subfamily A%2C polypeptide 4
		Zm00001d025533	4.13197	2.12292	AT1G59960.1	AT1G59960	NAD(P)-linked oxidoreductase superfamily protein
		Zm00001d025761	2.2247	3.55995	AT3G59710.3	AT3G59710	NAD(P)-binding Rossmann-fold superfamily protein
		Zm00001d027601	2.10177	4.38696	AT4G39490.1	CYP96A10	cytochrome P450%2C family 96%2C subfamily A%2C polypeptide 10
		Zm00001d033623	3.36986	2.20269	AT1G55020.1	LOX1	lipoxygenase 1
		Zm00001d034118	1.23037	2.99413	AT2G22330.1	CYP79B3	cytochrome P450%2C family 79%2C subfamily B%2C polypeptide 3
		Zm00001d042868	1.24007	-	AT2G37770.2	ChlAKR	NAD(P)-linked oxidoreductase superfamily protein
		Zm00001d043293	1.75771	2.99121	AT1G75450.1	CKX5	cytokinin oxidase 5
		Zm00001d044339	1.51212	2.1793	AT3G24503.1	ALDH2C4	aldehyde dehydrogenase 2C4
		Zm00001d045063	1.38492	1.42784	AT2G46950.1	CYP709B2	cytochrome P450%2C family 709%2C subfamily B%2C polypeptide 2
		Zm00001d045145	1.39909	-	AT5G20400.1	AT5G20400	2-oxoglutarate (2OG) and Fe(II)-dependent oxygenase superfamily protein
		Zm00001d045649	1.14427	1.964	AT3G27060.1	TSO2	Ferritin/ribonucleotide reductase-like family protein
		Zm00001d047418	1.40085	3.52788	AT2G46950.1	CYP709B2	cytochrome P450%2C family 709%2C subfamily B%2C polypeptide 2
		Zm00001d049597	2.06308	2.14913	AT4G05020.1	NDB2	NAD(P)H dehydrogenase B2
	cellular carbohydrate metabolic process	Zm00001d007327	1.07096	3.08878	AT1G67330.1	AGM2	glucuronoxylan 4-O-methyltransferase-like protein (DUF579)
		Zm00001d009997	1.08287	1.11637	AT2G26100.1	AT2G26100	Galactosyltransferase family protein
		Zm00001d024386	-1.67949	-	AT4G25810.1	XTR6	xyloglucan endotransglycosylase 6
		Zm00001d031415	1.053	1.06286	AT5G55500.1	XYLT	beta-1%2C2-xylosyltransferase
		Zm00001d037234	1.96256	2.64558	AT3G01180.1	SS2	starch synthase 2
		Zm00001d042536	2.63699	2.5616	AT1G06030.1	FRK6	pfkB-like carbohydrate kinase family protein
		Zm00001d047994	2.04689	1.11545	AT4G08170.1	ITPK3	Inositol 1%2C3%2C4-trisphosphate 5/6-kinase family protein
		Zm00001d050125	1.64296	2.06209	AT5G20280.1	SPS1F	sucrose phosphate synthase 1F
	signaling	Zm00001d005051	2.14855	1.50953	AT2G30520.1	RPT2	Phototropic-responsive NPH3 family protein
		Zm00001d010743	1.9875	1.62708	AT4G18700.1	CIPK12	CBL-interacting protein kinase 12
		Zm00001d011520	9.69745	1.59657	AT1G56720.4	AT1G56720	Protein kinase superfamily protein
		Zm00001d017604	1.17981	1.16653	AT2G46710.1	ROPGAP3	Rho GTPase activating protein with PAK-box/P21-Rho-binding domain-containing protein
		Zm00001d022069	1.80869	2.52933	AT3G29575.4	AFP3	ABI five binding protein 3
		Zm00001d032155	1.36098	1.18541	AT4G30960.1	SIP3	SOS3-interacting protein 3
		Zm00001d039596	1.1719	1.4708	AT3G24495.1	MSH7	MUTS homolog 7
		Zm00001d047990	2.38093	-	AT4G34500.1	AT4G34500	Protein kinase superfamily protein
		Zm00001d048222	1.10471	2.0123	AT5G65270.1	RABA4a	RAB GTPase homolog A4A
	response to hormone stimulus	Zm00001d022264	2.08383	1.80407	AT3G05880.1	RCI2A	Low temperature and salt responsive protein family
		Zm00001d034807	1.56847	1.59154	AT2G44060.2	LEA26	Late embryogenesis abundant protein%2C group 2
		Zm00001d039685	2.69262	3.99355	AT5G40390.1	SIP1	Raffinose synthase family protein
	cellular response to stress	Zm00001d012145	1.46939	1.60651	AT2G19490.1	RECA2	recA DNA recombination family protein
		Zm00001d042640	1.19907	1.46654	AT1G71310.2	RAD52-1	cobalt ion binding protein
	Glycerophospholipid metabolism	Zm00001d039670	1.84405	1.66145	AT3G15730.1	PLD	phospholipase D1/2
		Zm00001d022594	1.84603	2.02727	AT4G35790.2	PLD	phospholipase D1/2
		Zm00001d023979	1.82548	1.57376	AT5G63770.2	DGK2	diacylglycerol kinase (ATP)
		Zm00001d043263	1.30404	2.37606	AT2G20900.3	DGK5	diacylglycerol kinase (ATP)
		Zm00001d047763	1.07991	1.42552	AT2G39290.1	PGP1	phosphatidylglycerolphosphate synthase 1
		Zm00001d028698	1.16307	1.25341	AT2G39290.1	PGP1	phosphatidylglycerolphosphate synthase
		Zm00001d015399	1.12449	1.43157	AT2G32260.1	CCT1	choline-phosphate cytidylyltransferase
		Zm00001d005035	1.62486	1.67673	AT2G38670.1	PECT1	ethanolamine-phosphate cytidylyltransferase
		Zm00001d009497	2.77877	2.85463	AT1G15110.4	PSS1	phosphatidylserine synthase 2
		Zm00001d012567	1.41132	2.76979	AT2G41540.4	GPDHC1	glycerol-3-phosphate dehydrogenase (NAD+)
	Benzoxazinoid biosynthesis	Zm00001d048702	-2.0897	1.15714		bx3	indolin-2-one monooxygenase
		Zm00001d048709	-1.56883	2.06601		bx1	indole-3-glycerol-phosphate lyase
		Zm00001d048710	-3.19308	1.51638		bx2	indole-2-monooxygenase
	Fatty acid degradation	Zm00001d005019	1.3239	1.46649	AT2G04350.2	LACS8	long-chain acyl-CoA synthetase
		Zm00001d034832	1.55199	1.31648	AT2G04350.2	LACS	long-chain acyl-CoA synthetase
		Zm00001d005818	1.47397	1.2843	AT1G54100.2	ALDH7B4	aldehyde dehydrogenase 7B4
		Zm00001d027996	1.64804	-	AT5G42250.1	AT5G42250	Zinc-binding alcohol dehydrogenase family protein
	Butanoate metabolism	Zm00001d012590	1.34972	1.24318	AT3G15290		3-hydroxyacyl-CoA dehydrogenase family protein
	Pyruvate metabolism	Zm00001d016166	2.9032	2.62695	AT3G14940.2	PEPC	phosphoenolpyruvate carboxylase 3
		Zm00001d043601	1.29225	1.52394	AT5G25880.1	NADP-ME3	NADP-malic enzyme 3
		Zm00001d049049	1.65419	2.62916	AT2G36580.1	PK	Pyruvate kinase family protein
	Diterpenoid biosynthesis	Zm00001d037724	1.73828	3.0765	AT1G78440.1	ATGA2OX1	gibberellin 2-beta-dioxygenase
		Zm00001d039634	1.18488	3.05122	AT1G15550.1	GA3OX1	gibberellin 3-oxidase 1
	Cutin, suberine and wax biosynthesis	Zm00001d044730	1.26144	2.3781	AT1G70670.1	CLO4	Caleosin-related family protein
		Zm00001d014055	1.91719	2.07627	AT1G02205.2	CER1	Fatty acid hydroxylase superfamily
	Peroxisome	Zm00001d002261	1.52586	-	AT4G18360.4	GOX3	Aldolase-type TIM barrel family protein
	Others	Zm00001d019139	1.00803	-	AT5G13710.2	SMT1	sterol methyltransferase 1
