# Supplementary material for: Transcriptome Analysis of Tolerant and Susceptible Maize Genotypes Reveals Novel Insights about the Molecular Mechanisms Underlying Drought Responses in Leaves
Source: Int J Mol Sci. 2021 Jun 29;22(13):6980. doi: 10.3390/ijms22136980 (PMC8268334; doi:10.3390/ijms22136980)
Supplement: Supplementary file 1 [file ijms-22-06980-s001.zip › Supplementary Tables/Table S9.xlsx]

## Sheet: Table S9
Table S9: Drought responsive genes down-regulated in LX9801 with no changes observed in CML69 after 3D of drought stress treatment. The extent of differential expression is measured in terms of log2 Fold Change and hyphen (-) indicates failure to meet the significance cut off or undetected. Values in red and blue indicate the log2 Fold Change increases or decreases in the drought-stressed seedlin…
Stress stage	GO/KEGG	gene	CML69(log2FoldChange)	LX9801(log2FoldChange)	Best-hit-A.th	Arabi-symbol	Annotation
C vs 3D	Carbon fixation in photosynthetic organisms	Zm00001d053015	-	-1.78018	AT4G38970.1	FBA2	fructose-bisphosphate aldolase, class I
		Zm00001d028562	-	-1.20806	AT3G54050.2	FBP	fructose-1,6-bisphosphatase I
		Zm00001d042727	-	-1.33071	AT1G43670.1	FBP	fructose-1,6-bisphosphatase I
		Zm00001d027488	-	-1.64771	AT1G42970.1	GAPB	glyceraldehyde-3-phosphate dehydrogenase B subunit
		Zm00001d022229	-	-1.44288	AT3G47520.1	MDH	malate dehydrogenase
		Zm00001d010672	-	-1.47777	AT1G56190.1	PGK2	phosphoglycerate kinase
		Zm00001d038579	-	-1.59815	AT1G56190.1	PGK2	phosphoglycerate kinase
		Zm00001d010321	-	-1.06462	AT4G15530.6	PPDK	pyruvate, orthophosphate dikinase
		Zm00001d002454	-	-1.13767	AT1G32060.1	PRK	phosphoribulokinase
		Zm00001d017711	-	-1.27187	AT1G32060.1	PRK	phosphoribulokinase
		Zm00001d052595	-	-1.31949	AT5G38430.1	RBCS1B	ribulose-bisphosphate carboxylase small chain
		Zm00001d004894	-	-1.86706	AT5G38410.3	RBCS3B	ribulose-bisphosphate carboxylase small chain
		Zm00001d042840	-	-1.35415	AT3G55800.1	SBPASE	sedoheptulose-bisphosphatase
		Zm00001d021310	-	-1.34019	AT2G21170.3	TIM	triosephosphate isomerase (TIM)
		Zm00001d045451	-	-1.56195	AT3G60750.1	TKL1	transketolase
	Photosynthesis - antenna proteins	Zm00001d005814	-	-1.20514	AT1G19150.1	Lhca2	PSI type II chlorophyll a/b-binding protein (Lhca2-1)
		Zm00001d046786	-	-1.01765	AT1G61520.3	Lhca3	PSI type III chlorophyll a/b-binding protein
		Zm00001d018157	-	-1.29116	AT1G45474.2	Lhca5	photosystem I light harvesting complex protein 5
		Zm00001d009589	-	-1.14207	AT2G34420.1	Lhcb1	photosystem II light harvesting complex protein B1
		Zm00001d011285	-	-1.63043	AT2G34420.1	Lhcb1	photosystem II light harvesting complex protein B1
		Zm00001d044396	-	-2.46829	AT2G34430.1	Lhcb1	light-harvesting chlorophyll-protein complex II subunit B1
		Zm00001d044399	-	-2.25773	AT2G34430.1	Lhcb1	light-harvesting chlorophyll-protein complex II subunit B1
		Zm00001d044401	-	-2.94345	AT2G34430.1	Lhcb1	light-harvesting chlorophyll-protein complex II subunit B1
		Zm00001d044402	-	-2.80581	AT2G34430.1	Lhcb1	light-harvesting chlorophyll-protein complex II subunit B1
		Zm00001d021784	-	-1.74132	AT5G54270.1	Lhcb3	light-harvesting chlorophyll B-binding protein 3
		Zm00001d006587	-	-1.07506	AT5G01530.1	Lhcb4	light harvesting complex photosystem II
		Zm00001d048998	-	-1.11701	AT4G10340.1	Lhcb5	light harvesting complex of photosystem II 5
		Zm00001d026599	-	-1.76732	AT1G15820.1	Lhcb6	light harvesting complex photosystem II subunit 6
	Photosynthesis
	F-type ATPase	Zm00001d018069	-	-1.2026	AT4G09650.1	ATPD	ATP synthase delta chain
	Photosynthetic electron transport	Zm00001d045620	-	-1.85732	AT1G76100.1	PetE	plastocyanin 1
	Photosystem I	Zm00001d013039	-	-1.02764	AT4G02770.1	PsaD	photosystem I subunit D-1
		Zm00001d005996	-	-1.03077	AT1G55670.1	PsaE	photosystem I subunit G
		Zm00001d013146	-	-1.14903	AT1G31330.1	PsaF	photosystem I subunit F
		Zm00001d019518	-	-1.08989	AT2G20260.1	PsaG	photosystem I subunit E-2
		Zm00001d008706	-	-1.10979	AT4G12800.1	PsaL	photosystem I subunit l
	Photosystem II	Zm00001d014564	-	-1.23333	AT3G50820.1	PsbO	photosystem II subunit O-2
		Zm00001d036535	-	-1.09717	AT3G50820.1	PsbO	photosystem II subunit O-2
		Zm00001d027422	-	-1.02561	AT3G55330.1	PsbP	PsbP-like protein 1
		Zm00001d028670	-	-1.59177	AT2G39470.1	PsbP	PsbP-like protein 2
		Zm00001d031421	-	-1.16127	AT3G55330.1	PsbP	PsbP-like protein 1
		Zm00001d006540	-	-1.42157	AT4G05180.2	PsbQ	photosystem II subunit Q-2
		Zm00001d018623	-	-1.00676	AT3G01440.1	PsbQ	PsbQ-like 1
		Zm00001d050889	-	-1.49137	AT1G14150.1	PsbQ	PsbQ-like 2
		Zm00001d043299	-	-1.19824	AT2G30570.1	PsbW	photosystem II reaction center W
		Zm00001d035135	-	-1.02669	AT1G67740.1	PsbY	photosystem II BY
	Glycolysis / Gluconeogenesis	Zm00001d028868	-	-1.08348	AT3G16910.1	AAE7	acetate/butyrate---CoA ligase
		Zm00001d034017	-	-2.48147		PDC	pyruvate dehydrogenase 2
		Zm00001d051754	-	-1.26414	AT3G48000.1	ALDH2B4	aldehyde dehydrogenase (NAD+)
		Zm00001d052233	-	-1.03646	AT1G78050.1	PGM	2,3-bisphosphoglycerate-dependent phosphoglycerate mutase
	Glyoxylate and dicarboxylate metabolism	Zm00001d025747	-	-1.05726	AT5G36790.3	PGP	phosphoglycolate phosphatase
	Phenylpropanoid biosynthesis	Zm00001d017279	-	-1.07615	AT2G37040.1	PAL1	phenylalanine ammonia-lyase
		Zm00001d039833	-	-1.79943	AT5G48930.1	HCT	shikimate O-hydroxycinnamoyltransferase
		Zm00001d039956	-	-1.01703	AT5G48930.1	HCT	shikimate O-hydroxycinnamoyltransferase
	Starch and sucrose metabolism	Zm00001d018342	-	-1.11083	AT2G18700.1	TPS	trehalose 6-phosphate synthase/phosphatase
		Zm00001d020272	-	-1.53229	AT4G39770.1	TPP	trehalose 6-phosphate phosphatase
		Zm00001d026415	-	-3.01729	AT5G64570.1	XYL4	xylan 1,4-beta-xylosidase
		Zm00001d034015	-	-1.63569	AT5G20950.3	BGLU	beta-glucosidase
		Zm00001d040650	-	-2.89521	AT1G53830.1	PME2	pectinesterase
		Zm00001d043110	-	-1.24753	AT1G02850.1	BGLU	beta-glucosidase
	generation of precursor metabolites and energy	Zm00001d020794	-	-1.07041	AT1G72230.1	AT1G72230	Cupredoxin superfamily protein
		Zm00001d021515	-	-1.35697	AT3G16250.1	PnsB3	NDH-dependent cyclic electron flow 1
		Zm00001d046177	-	-1.1872	ATCG00730.1	PETD	photosynthetic electron transfer D
	carbohydrate metabolic process	Zm00001d006161	-	-1.53805	AT2G28100.1	FUC1	alpha-L-fucosidase 1
		Zm00001d039994	-	-1.14246	AT1G68560.1	XYL1	alpha-xylosidase 1
		Zm00001d036370	-	-1.36876	AT3G12500.1	HCHIB	basic chitinase
		Zm00001d046357	-	-1.37241	AT3G13750.1	BGAL1	beta galactosidase 1
		Zm00001d027803	-	-1.47814	AT4G36360.1	BGAL3	beta-galactosidase 3
		Zm00001d028474	-	-2.08025	AT2G28470.3	BGAL8	beta-galactosidase 8
		Zm00001d037656	-	-2.11173	AT5G24090.1	CHIA	chitinase A
		Zm00001d053327	-	-1.46689	AT2G03220.1	FT1	fucosyltransferase 1
		Zm00001d038924	-	-2.44209	AT5G57500.1	AT5G57500	Galactosyltransferase family protein
		Zm00001d043587	-	-1.87227	AT3G58790.1	GAUT15	galacturonosyltransferase 15
		Zm00001d030285	-	-1.00734	AT5G66150.2	GH	Glycosyl hydrolase family 38 protein
		Zm00001d038052	-	-2.89662	AT4G16260.1	GH	Glycosyl hydrolase superfamily protein
		Zm00001d027729	-	-1.26171	AT1G64770.1	PnsB2	NDH-dependent cyclic electron flow 1
		Zm00001d014717	-	-1.23948	AT3G55830.1	EPC1	Nucleotide-diphospho-sugar transferases superfamily protein
		Zm00001d038373	-	-1.24581	AT2G01480.1	ESMD1	O-fucosyltransferase family protein
		Zm00001d007896	-	-1.95584	AT2G19440.2	ZETH	O-Glycosyl hydrolases family 17 protein
		Zm00001d018214	-	-1.47661	AT2G05790.1	AT2G05790	O-Glycosyl hydrolases family 17 protein
		Zm00001d021690	-	-1.66612	AT5G55180.2	AT5G55180	O-Glycosyl hydrolases family 17 protein
		Zm00001d021695	-	-1.43966	AT5G55180.1	AT5G55180	O-Glycosyl hydrolases family 17 protein
		Zm00001d004448	-	-2.48302	AT4G13710.1	AT4G13710	Pectin lyase-like superfamily protein
		Zm00001d011369	-	-1.20366	AT4G23820.1	AT4G23820	Pectin lyase-like superfamily protein
		Zm00001d033551	-	-1.39635	AT5G15070.5	ATVIP2	Phosphoglycerate mutase-like family protein
		Zm00001d018936	-	-1.10995	AT3G04790.1	EMB3119	Ribose 5-phosphate isomerase%2C type A protein
		Zm00001d017583	-	-1.72764	AT4G00750.1	AT4G00750	S-adenosyl-L-methionine-dependent methyltransferases superfamily protein
		Zm00001d031303	-	-1.42517	AT3G57520.1	SIP2	seed imbibition 2
		Zm00001d027877	-	-1.06296	AT3G13980.1	BG4	SKI/DACH domain protein
		Zm00001d024821	-	-3.14867	AT2G35840.4	AT2G35840	Sucrose-6F-phosphate phosphohydrolase family protein
		Zm00001d021249	-	-1.58326	AT1G63180.2	UGE3	UDP-D-glucose/UDP-D-galactose 4-epimerase 3
		Zm00001d052651	-	-1.30607	AT5G13870.3	XTH5	xyloglucan endotransglucosylase/hydrolase 5
	cell surface receptor linked signaling pathway	Zm00001d014952	-	-1.06288	AT1G33260.1	PK	Protein kinase superfamily protein
		Zm00001d025959	-	-1.84859	AT1G33260.2	PK	Protein kinase superfamily protein
		Zm00001d050164	-	-2.0949	AT5G02070.1	PK	Protein kinase family protein
		Zm00001d044639	-	-3.96399	AT5G10530.1	LecRK-IX.1	Concanavalin A-like lectin protein kinase family protein
		Zm00001d043781	-	-1.53174	AT3G55550.1	LecRK-S.4	Concanavalin A-like lectin protein kinase family protein
		Zm00001d017821	-	-2.60375	AT5G55830.1	LecRK-S.7	Concanavalin A-like lectin protein kinase family protein
		Zm00001d042293	-	-1.49358	AT3G53380.1	LecRK-VIII.1	Concanavalin A-like lectin protein kinase family protein
		Zm00001d020955	-	-1.83096	AT1G21240.1	WAK3	wall associated kinase 3
		Zm00001d003021	-	-1.18814	AT1G21230.1	WAK5	wall associated kinase 5
	catabolic process	Zm00001d004917	-	-1.28417	AT1G35330.1	AT1G35330	RING/U-box superfamily protein
		Zm00001d006257	-	-1.69106	AT4G35790.2	PLD	phospholipase D1/2
		Zm00001d014025	-	-1.2463	AT4G35220.1	CYCLASE2	Cyclase family protein
		Zm00001d020887	-	-3.61292	AT5G10770.1	AT5G10770	Eukaryotic aspartyl protease family protein
		Zm00001d023341	-	-1.14042	AT3G10910.1	DAFL1	RING/U-box superfamily protein
		Zm00001d024281	-	-1.01673	AT5G13700.1	PAO1	polyamine oxidase 1
		Zm00001d027685	-	-1.46242	AT1G23980.1	AT1G23980	RING/U-box superfamily protein
		Zm00001d029372	-	-1.33172	AT3G63470.1	scpl40	serine carboxypeptidase-like 40
		Zm00001d032501	-	-1.55936	AT1G11190.1	BFN1	bifunctional nuclease i
		Zm00001d037155	-	-2.0465	AT2G03200.1	ASPR1	Eukaryotic aspartyl protease family protein
		Zm00001d037797	-	-1.23534	AT2G24000.2	scpl22	serine carboxypeptidase-like 22
		Zm00001d038695	-	-1.7732	AT1G78440.1	ATGA2OX1	gibberellin 2-beta-dioxygenase
		Zm00001d040741	-	-1.1621	AT3G17180.1	scpl33	serine carboxypeptidase-like 33
		Zm00001d042848	-	-1.37523	AT3G09220.2	LAC7	laccase 7
		Zm00001d043674	-	-1.24401	AT2G19570.1	CDA1	cytidine deaminase 1
		Zm00001d043864	-	-1.45295	AT3G12700.1	NANA	Eukaryotic aspartyl protease family protein
		Zm00001d051206	-	-3.60601	AT5G23210.1	SCPL34	serine carboxypeptidase-like 34
		Zm00001d051695	-	-1.20283	AT5G10770.1	AT5G10770	Eukaryotic aspartyl protease family protein
	dephosphorylation	Zm00001d015484	-	-1.20316	AT2G23820.2	AT2G23820	Metal-dependent phosphohydrolase
		Zm00001d021634	-	-1.23975	AT3G02970.1	EXL6	EXORDIUM LIKE 6
		Zm00001d028367	-	-2.15847	AT1G14700.1	PAP3	purple acid phosphatase 3
		Zm00001d037680	-	-1.31165	AT4G25150.1	AT4G25150	HAD superfamily%2C subfamily IIIB acid phosphatase
		Zm00001d043621	-	-1.48352	AT1G73010.1	PS2	phosphoethanolamine/phosphocholine phosphatase
		Zm00001d047972	-	-1.85004	AT2G01900.1	t5ptase9	DNAse I-like superfamily protein
		Zm00001d053566	-	-1.96162	AT5G36250.1	PP2C74	Protein phosphatase 2C family protein
	cellular response to oxidative stress	Zm00001d010924	-	-1.57782	AT5G51890.1	Prx66	Peroxidase superfamily protein
		Zm00001d016736	-	-1.02952	AT5G06290.1	2-Cys Prx B	2-cysteine peroxiredoxin B
		Zm00001d031908	-	-1.61408	AT2G28190.1	CSD2	copper/zinc superoxide dismutase 2
		Zm00001d037103	-	-1.29273	AT3G26060.1	PRXQ	Thioredoxin superfamily protein
		Zm00001d040399	-	-1.14183	AT2G39040.1	AT2G39040	Peroxidase superfamily protein
		Zm00001d054044	-	-1.07068	AT1G20630.1	CAT1	catalase 1
	protein modification process	Zm00001d026018	-	-1.12093	AT4G35310.2	CPK5	calmodulin-domain protein kinase 5
		Zm00001d037783	-	-1.11002	AT3G23000.1	CIPK7	CBL-interacting protein kinases
		Zm00001d046424	-	-1.70041	AT5G10530.1	LecRK-IX.1	Concanavalin A-like lectin protein kinase family protein
		Zm00001d021692	-	-2.09653	AT4G05200.1	CRK25	cysteine-rich RLK (RECEPTOR-like protein kinase) 25
		Zm00001d018077	-	-1.15421	AT4G39710.3	PnsL4	FK506-binding protein 16-2
		Zm00001d030171	-	-1.01385	AT1G34300.1	AT1G34300	lectin protein kinase family protein
		Zm00001d038020	-	-1.62417	AT4G18640.1	MRH1	Leucine-rich repeat protein kinase family protein
		Zm00001d039188	-	-1.24697	AT3G02880.1	KIN7	Leucine-rich repeat protein kinase family protein
		Zm00001d041773	-	-1.41191	AT1G79620.1	VRLK1	Leucine-rich repeat protein kinase family protein
		Zm00001d017270	-	-2.41911	AT3G04530.1	PPCK2	phosphoenolpyruvate carboxylase kinase 2
		Zm00001d004440	-	-1.32813	AT5G64330.1	NPH3	Phototropic-responsive NPH3 family protein
		Zm00001d016898	-	-1.23191	AT5G64330.1	NPH3	Phototropic-responsive NPH3 family protein
		Zm00001d047632	-	-1.267	AT2G18790.1	PHYB	phytochrome B
		Zm00001d014996	-	-1.12952	AT2G02220.1	PSKR1	phytosulfokin receptor 1
		Zm00001d033704	-	-1.43002	AT2G33730.1	SMA1	P-loop containing nucleoside triphosphate hydrolases superfamily protein
		Zm00001d024961	-	-1.80066	AT5G38280.2	PR5K	PR5-like receptor kinase
		Zm00001d043516	-	-1.37948	AT1G51940.1	LYK3	protein kinase family protein / peptidoglycan-binding LysM domain-containing protein
		Zm00001d011458	-	-1.00379	AT3G01490.1	AT3G01490	Protein kinase superfamily protein
		Zm00001d015884	-	-2.1387	AT2G33580.1	LYK5	Protein kinase superfamily protein
		Zm00001d021303	-	-1.19419	AT5G47070.1	PBL19	Protein kinase superfamily protein
		Zm00001d037112	-	-1.29965	AT2G05940.1	RIPK	Protein kinase superfamily protein
		Zm00001d054014	-	-1.19046	AT2G17220.1	Kin3	Protein kinase superfamily protein
		Zm00001d043256	-	-1.76698	AT4G21380.1	RK3	receptor kinase 3
		Zm00001d013107	-	-1.65997	AT5G22000.3	RHF2A	RING-H2 group F2A
		Zm00001d051829	-	-1.43331	AT1G20780.3	SAUL1	senescence-associated E3 ubiquitin ligase 1
		Zm00001d020170	-	-1.35113	AT2G25737.1	AT2G25737	Sulfite exporter TauE/SafE family protein
	phosphate metabolic process	Zm00001d003639	-	-1.33664	AT4G38230.1	CPK26	calcium-dependent protein kinase 26
		Zm00001d004513	-	-1.36813	AT1G19920.1	APS2	3'-phosphoadenosine 5'-phosphosulfate synthase
		Zm00001d012707	-	-3.27096	AT4G21470.1	FMN/FHY	riboflavin kinase/FMN hydrolase
		Zm00001d017770	-	-1.02088	AT1G01050.2	PPa1	pyrophosphorylase 1
		Zm00001d029606	-	-1.23259	AT2G42880.2	MPK20	MAP kinase 20
		Zm00001d030163	-	-1.15159	AT4G19120.2	ERD3	S-adenosyl-L-methionine-dependent methyltransferases superfamily protein
		Zm00001d035034	-	-1.07702	AT5G47840.1	AMK2	adenosine monophosphate kinase
		Zm00001d035737	-	-1.14225	AT1G80380.2	GLYK	P-loop containing nucleoside triphosphate hydrolases superfamily protein
		Zm00001d038657	-	-1.12721	AT1G06750.3	AT1G06750	P-loop containing nucleoside triphosphate hydrolases superfamily protein
	response to cytokinin stimulus	Zm00001d016361	-	-1.30063	AT4G26150.1	CGA1	cytokinin-responsive gata factor 1
		Zm00001d038047	-	-1.04242	AT5G14910.2	AT5G14910	Heavy metal transport/detoxification superfamily protein
		Zm00001d049267	-	-1.00666	AT4G25050.1	ACP4	acyl carrier protein 4
	regulation of defense response	Zm00001d005813	-	-1.16277	AT1G19180.2	JAZ1	jasmonate-zim-domain protein 1
		Zm00001d028432	-	-1.11627	AT1G56170.1	NF-YC2	Nuclear factor Y
		Zm00001d037914	-	-2.40248
		Zm00001d049204	-	-1.33845	AT3G25070.2	RIN4	RPM1 interacting protein 4
	oxidation reduction	Zm00001d003086	-	-1.24089	AT1G06690.1	AT1G06690	NAD(P)-linked oxidoreductase superfamily protein
		Zm00001d003174	-	-1.38184	AT3G59710.3	AT3G59710	NAD(P)-binding Rossmann-fold superfamily protein
		Zm00001d004555	-	-3.21038	AT5G06900.1	CYP93D1	cytochrome P450%2C family 93%2C subfamily D%2C polypeptide 1
		Zm00001d005823	-	-3.03409	AT5G07990.1	TT7	Cytochrome P450 superfamily protein
		Zm00001d006069	-	-3.06373	AT4G13010.1	CeQORH	Oxidoreductase%2C zinc-binding dehydrogenase family protein
		Zm00001d006193	-	-1.45902	AT2G46660.1	CYP78A6	cytochrome P450%2C family 78%2C subfamily A%2C polypeptide 6
		Zm00001d018652	-	-1.21445	AT5G61290.1	AT5G61290	Flavin-binding monooxygenase family protein
		Zm00001d022203	-	-1.10951	AT3G09580.1	AT3G09580	FAD/NAD(P)-binding oxidoreductase family protein
		Zm00001d023759	-	-1.005	AT4G18360.3	GOX3	Aldolase-type TIM barrel family protein
		Zm00001d024312	-	-1.96103	AT3G14420.2	GOX1	Aldolase-type TIM barrel family protein
		Zm00001d026056	-	-1.01771	AT4G25700.1	BETA-OHASE 1	beta-hydroxylase 1
		Zm00001d027537	-	-3.09457	AT2G46660.1	CYP78A6	cytochrome P450%2C family 78%2C subfamily A%2C polypeptide 6
		Zm00001d029719	-	-1.20584	AT1G01510.1	AN	NAD(P)-binding Rossmann-fold superfamily protein
		Zm00001d030090	-	-1.02612	AT2G23910.1	AT2G23910	NAD(P)-binding Rossmann-fold superfamily protein
		Zm00001d031449	-	-2.26044	AT3G45140.1	LOX2	lipoxygenase 2
		Zm00001d043266	-	-4.10739	AT4G21490.1	NDB3	NAD(P)H dehydrogenase B3
		Zm00001d044908	-	-1.32139	AT1G76680.1	OPR1	12-oxophytodienoate reductase 1
		Zm00001d052530	-	-2.32725	AT2G27690.1	CYP94C1	cytochrome P450%2C family 94%2C subfamily C%2C polypeptide 1
	small molecule biosynthetic process	Zm00001d004689	-	-2.43206	AT4G35160.1	ASMT	O-methyltransferase family protein
		Zm00001d007936	-	-1.49619	AT5G01410.2	RSR4	Aldolase-type TIM barrel family protein
		Zm00001d009354	-	-1.35989	AT1G68530.1	KCS6	3-ketoacyl-CoA synthase 6
		Zm00001d010535	-	-1.31376	AT5G59750.2	RIBA3	monofunctional riboflavin biosynthesis protein RIBA 3
		Zm00001d023887	-	-1.4091	AT4G25050.1	ACP4	acyl carrier protein 4
		Zm00001d026501	-	-1.9675	AT5G35630.3	GS2	glutamine synthetase 2
		Zm00001d050412	-	-2.63482	AT3G29200.1	CM1	chorismate mutase
	macromolecule metabolic process	Zm00001d002650	-	-1.09539	AT1G48410.1	AGO1	Stabilizer of iron transporter SufD / Polynucleotidyl transferase
		Zm00001d015798	-	-1.34224	AT2G04160.1	AIR3	Subtilisin-like serine endopeptidase family protein
		Zm00001d026448	-	-2.61084	AT4G36920.2	AP2	Integrase-type DNA-binding superfamily protein
		Zm00001d033194	-	-1.40128	AT5G67360.1	ARA12	Subtilase family protein
		Zm00001d053819	-	-2.15302	AT1G30330.3	ARF6	auxin response factor 6
		Zm00001d038250	-	-1.00727	AT1G11040.1	AT1G11040	HSP40/DnaJ peptide-binding protein
		Zm00001d042641	-	-1.09432	AT1G22910.2	AT1G22910	RNA-binding (RRM/RBD/RNP motifs) family protein
		Zm00001d011187	-	-1.30589	AT3G21330.1	AT3G21330	basic helix-loop-helix (bHLH) DNA-binding superfamily protein
		Zm00001d044242	-	-1.7421	AT3G21330.1	AT3G21330	basic helix-loop-helix (bHLH) DNA-binding superfamily protein
		Zm00001d034970	-	-1.08786	AT3G44330.1	AT3G44330	M28 Zn-peptidase nicastrin
		Zm00001d007517	-	-1.28421	AT4G21640.1	AT4G21640	Subtilase family protein
		Zm00001d017992	-	-1.5212	AT1G59970.1	AT5-MMP	Matrixin family protein
		Zm00001d021205	-	-10.5587	AT4G25470.1	CBF2	C-repeat/DRE binding factor 2,ERF
		Zm00001d021208	-	-1.03069	AT4G25470.1	CBF2	C-repeat/DRE binding factor 2,ERF
		Zm00001d002618	-	-12.2184	AT5G51990.1	CBF4	C-repeat-binding factor 4, ERF
		Zm00001d049158	-	-1.4875	AT3G23690.1	CIL2	basic helix-loop-helix (bHLH) DNA-binding superfamily protein
		Zm00001d045661	-	-1.36329	AT1G25440.1	COL16	B-box type zinc finger protein with CCT domain-containing protein, CO-like
		Zm00001d029201	-	-1.09309	AT1G05190.1	EMB2394	Ribosomal protein L6 family
		Zm00001d017462	-	-1.18716	AT4G17500.1	ERF-1	ethylene responsive element binding factor 1
		Zm00001d028472	-	-1.07998	AT3G06250.3	FRS7	FAR1-related sequence 7
		Zm00001d009193	-	-1.2589	AT5G26930.1	GATA23	GATA transcription factor 23
		Zm00001d053713	-	-1.04438	AT3G27160.1	GHS1	Ribosomal protein S21 family protein
		Zm00001d045400	-	-1.31869	AT5G06710.1	HAT14	homeobox leucine zipper protein, HD-ZIP
		Zm00001d028408	-	-1.73025	AT4G27670.1	HSP21	heat shock protein 21
		Zm00001d018056	-	-1.82441	AT1G26945.1	KDR	basic helix-loop-helix (bHLH) DNA-binding superfamily protein
		Zm00001d036827	-	-2.56648	AT4G26760.1	MAP65-2	microtubule-associated protein 65-2
		Zm00001d044771	-	-2.27566	AT1G70170.1	MMP	matrix metalloproteinase
		Zm00001d038270	-	-1.0261	AT2G38090.1	MYB	Duplicated homeodomain-like superfamily protein
		Zm00001d032024	-	-1.14474	AT4G38620.1	MYB4	myb domain protein 4
		Zm00001d040464	-	-1.58887	AT1G49010.1	MYBS1	Duplicated homeodomain-like superfamily protein,MYB_related
		Zm00001d024268	-	-1.46839	AT1G56010.2	NAC1	NAC domain containing protein 1
		Zm00001d033215	-	-1.42646	AT5G06510.3	NF-YA10	nuclear factor Y%2C subunit A10
		Zm00001d048309	-	-1.77979	AT3G28857.1	PRE5	basic helix-loop-helix (bHLH) DNA-binding family protein
		Zm00001d043972	-	-1.02946	AT3G27830.2	RPL12-A	ribosomal protein L12-A
		Zm00001d036307	-	-1.10844	ATCG00180.1	RPOC1	DNA-directed RNA polymerase family protein
		Zm00001d026697	-	-1.49593	AT1G79850.1	RPS17	ribosomal protein S17
		Zm00001d046332	-	-1.67339	AT1G29950.2	SACL3	basic helix-loop-helix (bHLH) DNA-binding superfamily protein
		Zm00001d020017	-	-1.52228	AT1G04110.1	SDD1	Subtilase family protein
		Zm00001d027387	-	-1.28347	AT1G04110.1	SDD1	Subtilase family protein
		Zm00001d037221	-	-1.43327	AT1G69690.1	TCP15	TCP family transcription factor
		Zm00001d053020	-	-1.39252	AT1G58100.1	TCP8	TCP family transcription factor
		Zm00001d027732	-	-1.76415	AT4G26330.2	UNE17	Subtilisin-like serine endopeptidase family protein
		Zm00001d020495	-	-2.35324	AT4G31800.2	WRKY18	WRKY DNA-binding protein 18
		Zm00001d020492	-	-2.76336	AT1G80840.1	WRKY40	WRKY DNA-binding protein 40
		Zm00001d053746	-	-1.54557	AT2G25000.4	WRKY60	WRKY DNA-binding protein 60
		Zm00001d023616	-	-1.48412	AT3G56400.1	WRKY70	WRKY DNA-binding protein 70
	homeostatic process	Zm00001d004957	-	-1.34473	AT5G05690.1	CYP90A	Cytochrome P450 superfamily protein
		Zm00001d018238	-	-1.1813	AT5G06690.1	TRXL2.1	WCRKC thioredoxin 1
		Zm00001d022518	-	-1.39276	AT1G08570.2	ACHT4	atypical CYS HIS rich thioredoxin 4
		Zm00001d038018	-	-2.12904	AT5G58530.1	AT5G58530	Glutaredoxin family protein
		Zm00001d039647	-	-1.00349	AT1G15460.2	BOR4	Encodes a efflux-type boron transporter
		Zm00001d044841	-	-1.60655	AT5G39865.1	AT5G39865	Glutaredoxin family protein
		Zm00001d048819	-	-1.31672	AT5G36110.1	CYP716A1	cytochrome P450%2C family 716%2C subfamily A%2C polypeptide 1
	Others	Zm00001d001820	-	-2.77042	AT5G54190.1	PORA	protochlorophyllide oxidoreductase A
		Zm00001d008681	-	-1.02661	AT2G14960.1	GH3.1	Auxin responsive GH3
		Zm00001d012394	-	-1.14956	AT5G17230.4	PSY	15-cis-phytoene synthase
		Zm00001d013013	-	-1.00841	AT1G08520.1	ALB1	ALBINA 1
		Zm00001d016990	-	-1.20595	AT3G01380.1	AT3G01380	sulfatase and phosphatidylinositolglycan class N domain-containing protein
		Zm00001d023536	-	-1.10982	AT5G45930.1	CHLI2	magnesium chelatase subunit I
		Zm00001d039715	-	-1.13064	AT2G14960.1	GH3.1	Auxin responsive GH3
		Zm00001d042584	-	-1.02288	AT2G02500.2	ISPD	2-C-methyl-D-erythritol 4-phosphate cytidylyltransferase
		Zm00001d045138	-	-1.28498	AT5G34940.2	GUS3	glucuronidase 3
		Zm00001d053009	-	-1.52622	AT1G77590.1	LACS9	long chain acyl-CoA synthetase 9
		Zm00001d053974	-	-1.47513	AT5G48790.1	AT5G48790	LOW PSII ACCUMULATION protein (DUF1995)
C vs 5D	Carbon fixation in photosynthetic organisms	Zm00001d002454	-1.36981	-1.64998	AT1G32060.1	PRK	phosphoribulokinase
		Zm00001d004894	-2.02562	-2.01305	AT5G38410.3	RBCS3B	ribulose-bisphosphate carboxylase small chain
		Zm00001d010321	-1.70592	-1.69671	AT4G15530.6	PPDK	pyruvate, orthophosphate dikinase
		Zm00001d010672	-1.84553	-1.5211	AT1G56190.1	PGK2	phosphoglycerate kinase
		Zm00001d017711	-2.05181	-1.89452	AT1G32060.1	PRK	phosphoribulokinase
		Zm00001d021310	-1.54713	-1.33405	AT2G21170.3	TIM	triosephosphate isomerase (TIM)
		Zm00001d022229	-1.14213	-1.49275	AT3G47520.1	MDH	malate dehydrogenase
		Zm00001d027488	-1.33385	-1.18912	AT1G42970.1	GAPB	glyceraldehyde-3-phosphate dehydrogenase B subunit
		Zm00001d028562	-2.0702	-1.75877	AT3G54050.2	FBP	fructose-1,6-bisphosphatase I
		Zm00001d038579	-1.84492	-1.74039	AT1G56190.1	PGK2	phosphoglycerate kinase
		Zm00001d042727	-1.38694	-1.16166	AT1G43670.1	FBP	fructose-1,6-bisphosphatase I
		Zm00001d042840	-1.87937	-1.73029	AT3G55800.1	SBPASE	sedoheptulose-bisphosphatase
		Zm00001d045451	-1.30285	-1.71815	AT3G60750.1	TKL1	transketolase
		Zm00001d052595	-1.13419	-1.9046	AT5G38430.1	RBCS1B	ribulose-bisphosphate carboxylase small chain
		Zm00001d053015	-2.29355	-2.34782	AT4G38970.1	FBA2	fructose-bisphosphate aldolase, class I
	Photosynthesis - antenna proteins	Zm00001d005814	-1.87723	-1.54117	AT1G19150.1	Lhca2	PSI type II chlorophyll a/b-binding protein (Lhca2-1)
		Zm00001d046786	-1.51133	-1.30598	AT1G61520.3	Lhca3	PSI type III chlorophyll a/b-binding protein
		Zm00001d018157	-1.07215	-1.32128	AT1G45474.2	Lhca5	photosystem I light harvesting complex protein 5
		Zm00001d009589	-2.23522	-1.26285	AT2G34420.1	Lhcb1	photosystem II light harvesting complex protein B1
		Zm00001d011285	-2.42044	-2.00352	AT2G34420.1	Lhcb1	photosystem II light harvesting complex protein B1
		Zm00001d044396	-3.87846	-2.93655	AT2G34430.1	Lhcb1	light-harvesting chlorophyll-protein complex II subunit B1
		Zm00001d044399	-3.72867	-2.56156	AT2G34430.1	Lhcb1	light-harvesting chlorophyll-protein complex II subunit B1
		Zm00001d044401	-4.96775	-2.72576	AT2G34430.1	Lhcb1	light-harvesting chlorophyll-protein complex II subunit B1
		Zm00001d044402	-3.99455	-2.85629	AT2G34430.1	Lhcb1	light-harvesting chlorophyll-protein complex II subunit B1
		Zm00001d021784	-2.08034	-1.63379	AT5G54270.1	Lhcb3	light-harvesting chlorophyll B-binding protein 3
		Zm00001d006587	-2.18622	-1.53382	AT5G01530.1	Lhcb4	light harvesting complex photosystem II
		Zm00001d048998	-1.75951	-1.35405	AT4G10340.1	Lhcb5	light harvesting complex of photosystem II 5
		Zm00001d026599	-3.03527	-1.68641	AT1G15820.1	Lhcb6	light harvesting complex photosystem II subunit 6
	Photosynthesis
	F-type ATPase	Zm00001d018069	-1.17201	-1.45283	AT4G09650.1	ATPD	ATP synthase delta chain
	Photosynthetic electron transport	Zm00001d045620	-2.77417	-1.92899	AT1G76100.1	PetE	plastocyanin 1
		Zm00001d013039	-2.09217	-1.35684	AT4G02770.1	PsaD	photosystem I subunit D-1
	Photosystem I	Zm00001d005996	-2.63407	-1.64803	AT1G55670.1	PsaE	photosystem I subunit G
		Zm00001d013146	-2.26956	-1.50802	AT1G31330.1	PsaF	photosystem I subunit F
		Zm00001d019518	-2.37598	-1.67829	AT2G20260.1	PsaG	photosystem I subunit E-2
		Zm00001d008706	-2.05504	-1.62007	AT4G12800.1	PsaL	photosystem I subunit l
	Photosystem II	Zm00001d014564	-2.18484	-1.22704	AT3G50820.1	PsbO	photosystem II subunit O-2
		Zm00001d036535	-1.7525	-1.4261	AT3G50820.1	PsbO	photosystem II subunit O-2
		Zm00001d027422	-1.42914	-1.15566	AT3G55330.1	PsbP	PsbP-like protein 1
		Zm00001d028670	-1.65647	-1.48728	AT2G39470.1	PsbP	PsbP-like protein 2
		Zm00001d031421	-2.33242	-1.57897	AT3G55330.1	PsbP	PsbP-like protein 1
		Zm00001d006540	-3.54533	-2.23775	AT4G05180.2	PsbQ	photosystem II subunit Q-2
		Zm00001d018623	-1.09737	-2.1324	AT3G01440.1	PsbQ	PsbQ-like 1
		Zm00001d050889	-1.8624	-1.84788	AT1G14150.1	PsbQ	PsbQ-like 2
		Zm00001d043299	-2.14117	-1.53047	AT2G30570.1	PsbW	photosystem II reaction center W
		Zm00001d035135	-2.11138	-1.35862	AT1G67740.1	PsbY	photosystem II BY
	Glycolysis / Gluconeogenesis	Zm00001d028868	-1.27613	-1.26876	AT3G16910.1	AAE7	acetate/butyrate---CoA ligase
		Zm00001d034017	-2.57206	-1.59054		PDC	pyruvate dehydrogenase 2
		Zm00001d051754	-1.21501	-1.5652	AT3G48000.1	ALDH2B4	aldehyde dehydrogenase (NAD+)
		Zm00001d052233	-1.01106	-	AT1G78050.1	PGM	2,3-bisphosphoglycerate-dependent phosphoglycerate mutase
	Glyoxylate and dicarboxylate metabolism	Zm00001d025747	-1.28775	-1.10415	AT5G36790.3	PGP	phosphoglycolate phosphatase
	Phenylpropanoid biosynthesis	Zm00001d017279	1.74745	1.58752	AT2G37040.1	PAL1	phenylalanine ammonia-lyase
		Zm00001d039833	-2.41991	-1.72822	AT5G48930.1	HCT	shikimate O-hydroxycinnamoyltransferase
		Zm00001d039956	-1.17635	-	AT5G48930.1	HCT	shikimate O-hydroxycinnamoyltransferase
	Starch and sucrose metabolism	Zm00001d018342	-1.69006	-1.08848	AT2G18700.1	TPS	trehalose 6-phosphate synthase/phosphatase
		Zm00001d020272	-1.54544	-2.80202	AT4G39770.1	TPP	trehalose 6-phosphate phosphatase
		Zm00001d026415	-1.89741	-2.03367	AT5G64570.1	XYL4	xylan 1,4-beta-xylosidase
		Zm00001d034015	-1.86007	-1.17761	AT5G20950.3	BGLU	beta-glucosidase
		Zm00001d040650	-4.08769	-3.12253	AT1G53830.1	PME2	pectinesterase
		Zm00001d043110	-2.35727	-1.76924	AT1G02850.1	BGLU	beta-glucosidase
	generation of precursor metabolites and energy	Zm00001d020794	1.27727	-	AT1G72230.1	AT1G72230	Cupredoxin superfamily protein
		Zm00001d021515	-1.97165	-2.09482	AT3G16250.1	PnsB3	NDH-dependent cyclic electron flow 1
		Zm00001d046177	-1.60767	-1.11101	ATCG00730.1	PETD	photosynthetic electron transfer D
	carbohydrate metabolic process	Zm00001d004448	-1.94659	-1.46683	AT4G13710.1	AT4G13710	Pectin lyase-like superfamily protein
		Zm00001d006161	-2.75202	-1.81555	AT2G28100.1	FUC1	alpha-L-fucosidase 1
		Zm00001d007896	-1.98992	-1.5645	AT2G19440.2	ZETH	O-Glycosyl hydrolases family 17 protein
		Zm00001d011369	-1.68603	-1.10672	AT4G23820.1	AT4G23820	Pectin lyase-like superfamily protein
		Zm00001d014717	-1.53093	-1.17056	AT3G55830.1	EPC1	Nucleotide-diphospho-sugar transferases superfamily protein
		Zm00001d017583	-2.0857	-1.04353	AT4G00750.1	AT4G00750	S-adenosyl-L-methionine-dependent methyltransferases superfamily protein
		Zm00001d018214	-1.5091	-2.29133	AT2G05790.1	AT2G05790	O-Glycosyl hydrolases family 17 protein
		Zm00001d018936	-1.40803	-1.17532	AT3G04790.1	EMB3119	Ribose 5-phosphate isomerase%2C type A protein
		Zm00001d021249	-1.22692	-1.84609	AT1G63180.2	UGE3	UDP-D-glucose/UDP-D-galactose 4-epimerase 3
		Zm00001d021690	-2.23689	-	AT5G55180.2	AT5G55180	O-Glycosyl hydrolases family 17 protein
		Zm00001d021695	-3.02894	-	AT5G55180.1	AT5G55180	O-Glycosyl hydrolases family 17 protein
		Zm00001d024821	-2.02983	-2.0205	AT2G35840.4	AT2G35840	Sucrose-6F-phosphate phosphohydrolase family protein
		Zm00001d027729	-2.08026	-2.14276	AT1G64770.1	PnsB2	NDH-dependent cyclic electron flow 1
		Zm00001d027803	-1.39336	-1.42655	AT4G36360.1	BGAL3	beta-galactosidase 3
		Zm00001d027877	-1.88028	-2.6591	AT3G13980.1	BG4	SKI/DACH domain protein
		Zm00001d028474	-1.43265	-	AT2G28470.3	BGAL8	beta-galactosidase 8
		Zm00001d030285	1.06485	-1.57573	AT5G66150.2	AT5G66150	Glycosyl hydrolase family 38 protein
		Zm00001d031303	-1.77171	-3.22598	AT3G57520.1	SIP2	seed imbibition 2
		Zm00001d033551	-1.37306	-2.75346	AT5G15070.5	ATVIP2	Phosphoglycerate mutase-like family protein
		Zm00001d036370	2.21248	-	AT3G12500.1	HCHIB	basic chitinase
		Zm00001d037656	2.29339	-	AT5G24090.1	CHIA	chitinase A
		Zm00001d038052	-3.30154	-2.67853	AT4G16260.1	AT4G16260	Glycosyl hydrolase superfamily protein
		Zm00001d038373	-1.82751	-2.23419	AT2G01480.1	ESMD1	O-fucosyltransferase family protein
		Zm00001d038924	-1.40493	-1.38301	AT5G57500.1	AT5G57500	Galactosyltransferase family protein
		Zm00001d039994	-1.77053	-1.38008	AT1G68560.1	XYL1	alpha-xylosidase 1
		Zm00001d043587	-1.82673	-1.76935	AT3G58790.1	GAUT15	galacturonosyltransferase 15
		Zm00001d046357	-1.93252	-1.43753	AT3G13750.1	BGAL1	beta galactosidase 1
		Zm00001d052651	-1.62971	2.1436	AT5G13870.3	XTH5	xyloglucan endotransglucosylase/hydrolase 5
		Zm00001d053327	3.07609	-	AT2G03220.1	FT1	fucosyltransferase 1
	cell surface receptor linked signaling pathway	Zm00001d003021	-1.86142	-2.69376	AT1G21230.1	WAK5	wall associated kinase 5
		Zm00001d014952	-1.05174	-	AT1G33260.1	AT1G33260	Protein kinase superfamily protein
		Zm00001d017821	-1.48923	-4.40167	AT5G55830.1	LecRK-S.7	Concanavalin A-like lectin protein kinase family protein
		Zm00001d020955	-2.05573	-2.75205	AT1G21240.1	WAK3	wall associated kinase 3
		Zm00001d025959	-1.6899	-2.8002	AT1G33260.2	AT1G33260	Protein kinase superfamily protein
		Zm00001d042293	-1.39918	-2.85134	AT3G53380.1	LecRK-VIII.1	Concanavalin A-like lectin protein kinase family protein
		Zm00001d043781	-1.18879	-	AT3G55550.1	LecRK-S.4	Concanavalin A-like lectin protein kinase family protein
		Zm00001d044639	-1.91559	-	AT5G10530.1	LecRK-IX.1	Concanavalin A-like lectin protein kinase family protein
		Zm00001d050164	1.1094	-2.5805	AT5G02070.1	AT5G02070	Protein kinase family protein
	catabolic process	Zm00001d004917	-1.14511	-1.14556	AT1G35330.1	AT1G35330	RING/U-box superfamily protein
		Zm00001d006257	-1.19615	-2.5727	AT4G35790.2	PLD	phospholipase D1/2
		Zm00001d014025	-1.703	-	AT4G35220.1	CYCLASE2	Cyclase family protein
		Zm00001d020887	-3.83377	-3.53134	AT5G10770.1	AT5G10770	Eukaryotic aspartyl protease family protein
		Zm00001d023341	-2.07214	-	AT3G10910.1	DAFL1	RING/U-box superfamily protein
		Zm00001d024281	-1.56086	-	AT5G13700.1	PAO1	polyamine oxidase 1
		Zm00001d027685	-1.94813	-	AT1G23980.1	AT1G23980	RING/U-box superfamily protein
		Zm00001d029372	-1.10858	-2.47462	AT3G63470.1	scpl40	serine carboxypeptidase-like 40
		Zm00001d032501	-1.49937	-	AT1G11190.1	BFN1	bifunctional nuclease i
		Zm00001d037155	-1.59615	-2.94103	AT2G03200.1	ASPR1	Eukaryotic aspartyl protease family protein
		Zm00001d037797	1.46955	-1.7838	AT2G24000.2	scpl22	serine carboxypeptidase-like 22
		Zm00001d038695	-1.7899	2.11445	AT1G78440.1	ATGA2OX1	gibberellin 2-beta-dioxygenase
		Zm00001d040741	-1.92347	-1.12981	AT3G17180.1	scpl33	serine carboxypeptidase-like 33
		Zm00001d042848	-2.68148	-2.62971	AT3G09220.2	LAC7	laccase 7
		Zm00001d043674	1.19831	-	AT2G19570.1	CDA1	cytidine deaminase 1
		Zm00001d043864	-1.52959	-	AT3G12700.1	NANA	Eukaryotic aspartyl protease family protein
		Zm00001d051206	-2.32746	-3.38998	AT5G23210.1	SCPL34	serine carboxypeptidase-like 34
		Zm00001d051695	-1.00828	-2.40282	AT5G10770.1	AT5G10770	Eukaryotic aspartyl protease family protein
	dephosphorylation	Zm00001d015484	-1.3228	-1.6088	AT2G23820.2	AT2G23820	Metal-dependent phosphohydrolase
		Zm00001d021634	-2.51264	-2.82924	AT3G02970.1	EXL6	EXORDIUM LIKE 6
		Zm00001d028367	1.20392	-2.23172	AT1G14700.1	PAP3	purple acid phosphatase 3
		Zm00001d037680	-2.18168	-1.86563	AT4G25150.1	AT4G25150	HAD superfamily%2C subfamily IIIB acid phosphatase
		Zm00001d043621	2.33792	-	AT1G73010.1	PS2	phosphoethanolamine/phosphocholine phosphatase
		Zm00001d047972	1.17316	-1.32796	AT2G01900.1	t5ptase9	DNAse I-like superfamily protein
		Zm00001d053566	-1.50776	-1.80166	AT5G36250.1	PP2C74	Protein phosphatase 2C family protein
	cellular response to oxidative stress	Zm00001d010924	-1.96953	-1.51295	AT5G51890.1	Prx66	Peroxidase superfamily protein
		Zm00001d016736	-1.1528	-1.33273	AT5G06290.1	2-Cys Prx B	2-cysteine peroxiredoxin B
		Zm00001d031908	-1.24617	-	AT2G28190.1	CSD2	copper/zinc superoxide dismutase 2
		Zm00001d037103	-1.33815	-	AT3G26060.1	PRXQ	Thioredoxin superfamily protein
		Zm00001d040399	-1.36384	-	AT2G39040.1	AT2G39040	Peroxidase superfamily protein
		Zm00001d054044	-1.30677	-	AT1G20630.1	CAT1	catalase 1
	protein modification process	Zm00001d004440	-1.08004	-1.68038	AT5G64330.1	NPH3	Phototropic-responsive NPH3 family protein
		Zm00001d011458	-1.00902	-1.27447	AT3G01490.1	AT3G01490	Protein kinase superfamily protein
		Zm00001d013107	-2.05254	-1.83104	AT5G22000.3	RHF2A	RING-H2 group F2A
		Zm00001d014996	-2.02805	-1.86768	AT2G02220.1	PSKR1	phytosulfokin receptor 1
		Zm00001d015884	-2.27075	-1.66857	AT2G33580.1	LYK5	Protein kinase superfamily protein
		Zm00001d016898	-1.69438	-1.84953	AT5G64330.1	NPH3	Phototropic-responsive NPH3 family protein
		Zm00001d017270	1.58632	-1.991	AT3G04530.1	PPCK2	phosphoenolpyruvate carboxylase kinase 2
		Zm00001d018077	-2.28033	-2.08887	AT4G39710.3	PnsL4	FK506-binding protein 16-2
		Zm00001d020170	1.48876	-	AT2G25737.1	AT2G25737	Sulfite exporter TauE/SafE family protein
		Zm00001d021303	2.44043	-	AT5G47070.1	PBL19	Protein kinase superfamily protein
		Zm00001d021692	-1.39204	-3.3077	AT4G05200.1	CRK25	cysteine-rich RLK (RECEPTOR-like protein kinase) 25
		Zm00001d024961	-3.01692	-3.96455	AT5G38280.2	PR5K	PR5-like receptor kinase
		Zm00001d026018	-1.61242	-2.00405	AT4G35310.2	CPK5	calmodulin-domain protein kinase 5
		Zm00001d030171	-1.55499	-1.65472	AT1G34300.1	AT1G34300	lectin protein kinase family protein
		Zm00001d033704	-1.43293	-2.4621	AT2G33730.1	SMA1	P-loop containing nucleoside triphosphate hydrolases superfamily protein
		Zm00001d037112	-1.98721	-1.14964	AT2G05940.1	RIPK	Protein kinase superfamily protein
		Zm00001d037783	1.16799	-1.24837	AT3G23000.1	CIPK7	CBL-interacting protein kinases
		Zm00001d038020	-3.06093	-1.63965	AT4G18640.1	MRH1	Leucine-rich repeat protein kinase family protein
		Zm00001d039188	-1.0735	-1.83599	AT3G02880.1	KIN7	Leucine-rich repeat protein kinase family protein
		Zm00001d041773	-2.45723	-2.02171	AT1G79620.1	VRLK1	Leucine-rich repeat protein kinase family protein
		Zm00001d043256	-1.34486	-2.55039	AT4G21380.1	RK3	receptor kinase 3
		Zm00001d043516	-1.24426	-1.11809	AT1G51940.1	LYK3	protein kinase family protein / peptidoglycan-binding LysM domain-containing protein
		Zm00001d046424	-2.85063	-2.36467	AT5G10530.1	LecRK-IX.1	Concanavalin A-like lectin protein kinase family protein
		Zm00001d047632	-2.10097	-2.23738	AT2G18790.1	PHYB	phytochrome B
		Zm00001d051829	-1.1762	-1.84188	AT1G20780.3	SAUL1	senescence-associated E3 ubiquitin ligase 1
		Zm00001d054014	-1.4346	-2.1389	AT2G17220.1	Kin3	Protein kinase superfamily protein
	phosphate metabolic process	Zm00001d003639	-1.2562	-1.90451	AT4G38230.1	CPK26	calcium-dependent protein kinase 26
		Zm00001d004513	-2.08986	-1.19752	AT1G19920.1	APS2	3'-phosphoadenosine 5'-phosphosulfate synthase
		Zm00001d012707	-1.2391	-2.25363	AT4G21470.1	FMN/FHY	riboflavin kinase/FMN hydrolase
		Zm00001d017770	-1.99994	-1.31519	AT1G01050.2	PPa1	pyrophosphorylase 1
		Zm00001d029606	1.67135	-	AT2G42880.2	MPK20	MAP kinase 20
		Zm00001d030163	-1.61368	-1.84143	AT4G19120.2	ERD3	S-adenosyl-L-methionine-dependent methyltransferases superfamily protein
		Zm00001d035034	-1.05936	-	AT5G47840.1	AMK2	adenosine monophosphate kinase
		Zm00001d035737	-1.99864	-1.91029	AT1G80380.2	GLYK	P-loop containing nucleoside triphosphate hydrolases superfamily protein
		Zm00001d038657	-1.16132	-1.47278	AT1G06750.3	AT1G06750	P-loop containing nucleoside triphosphate hydrolases superfamily protein
	response to cytokinin stimulus	Zm00001d016361	-1.80739	-1.38552	AT4G26150.1	CGA1	cytokinin-responsive gata factor 1
		Zm00001d038047	-1.89688	-1.15892	AT5G14910.2	AT5G14910	Heavy metal transport/detoxification superfamily protein
		Zm00001d049267	-2.25402	-1.11839	AT4G25050.1	ACP4	acyl carrier protein 4
	regulation of defense response	Zm00001d005813	-1.19267	-1.1515	AT1G19180.2	JAZ1	jasmonate-zim-domain protein 1
		Zm00001d028432	-2.33711	-1.49122	AT1G56170.1	NF-YC2	Nuclear factor Y
		Zm00001d037914	-2.66359	-3.24993
		Zm00001d049204	-1.62697	-	AT3G25070.2	RIN4	RPM1 interacting protein 4
	oxidation reduction	Zm00001d003086	-1.10522	-	AT1G06690.1	AT1G06690	NAD(P)-linked oxidoreductase superfamily protein
		Zm00001d003174	-1.42969	-1.7747	AT3G59710.3	AT3G59710	NAD(P)-binding Rossmann-fold superfamily protein
		Zm00001d004555	-1.07574	-	AT5G06900.1	CYP93D1	cytochrome P450%2C family 93%2C subfamily D%2C polypeptide 1
		Zm00001d005823	-2.06401	-3.79569	AT5G07990.1	TT7	Cytochrome P450 superfamily protein
		Zm00001d006069	1.63099	-	AT4G13010.1	CeQORH	Oxidoreductase%2C zinc-binding dehydrogenase family protein
		Zm00001d006193	-1.09709	-2.7717	AT2G46660.1	CYP78A6	cytochrome P450%2C family 78%2C subfamily A%2C polypeptide 6
		Zm00001d018652	-2.42278	-1.53802	AT5G61290.1	AT5G61290	Flavin-binding monooxygenase family protein
		Zm00001d022203	-1.08678	-1.28033	AT3G09580.1	AT3G09580	FAD/NAD(P)-binding oxidoreductase family protein
		Zm00001d023759	-1.26022	-1.93829	AT4G18360.3	GOX3	Aldolase-type TIM barrel family protein
		Zm00001d024312	-1.63478	-1.42444	AT3G14420.2	GOX1	Aldolase-type TIM barrel family protein
		Zm00001d026056	2.1844	-	AT4G25700.1	BETA-OHASE 1	beta-hydroxylase 1
		Zm00001d027537	-3.24068	-4.82135	AT2G46660.1	CYP78A6	cytochrome P450%2C family 78%2C subfamily A%2C polypeptide 6
		Zm00001d029719	-2.19674	-2.30043	AT1G01510.1	AN	NAD(P)-binding Rossmann-fold superfamily protein
		Zm00001d030090	-1.01898	-	AT2G23910.1	AT2G23910	NAD(P)-binding Rossmann-fold superfamily protein
		Zm00001d031449	1.50962	-	AT3G45140.1	LOX2	lipoxygenase 2
		Zm00001d043266	-2.81827	-3.39555	AT4G21490.1	NDB3	NAD(P)H dehydrogenase B3
		Zm00001d044908	2.85701	-	AT1G76680.1	OPR1	12-oxophytodienoate reductase 1
		Zm00001d052530	-2.29659	-	AT2G27690.1	CYP94C1	cytochrome P450%2C family 94%2C subfamily C%2C polypeptide 1
	small molecule biosynthetic process	Zm00001d004689	-2.73318	-2.11206	AT4G35160.1	ASMT	O-methyltransferase family protein
		Zm00001d007936	-1.78789	-1.99256	AT5G01410.2	RSR4	Aldolase-type TIM barrel family protein
		Zm00001d009354	-1.64444	-1.91301	AT1G68530.1	KCS6	3-ketoacyl-CoA synthase 6
		Zm00001d010535	-1.75199	-2.11871	AT5G59750.2	RIBA3	monofunctional riboflavin biosynthesis protein RIBA 3
		Zm00001d023887	-2.03849	-1.54369	AT4G25050.1	ACP4	acyl carrier protein 4
		Zm00001d026501	-1.85389	-1.7361	AT5G35630.3	GS2	glutamine synthetase 2
		Zm00001d050412	-2.1857	-1.63147	AT3G29200.1	CM1	chorismate mutase
	macromolecule metabolic process	Zm00001d002618	-12.1397	-	AT5G51990.1	CBF4	C-repeat-binding factor 4
		Zm00001d002650	-1.82601	-1.79187	AT1G48410.1	AGO1	Stabilizer of iron transporter SufD / Polynucleotidyl transferase
		Zm00001d007517	-3.49829	-2.10147	AT4G21640.1	AT4G21640	Subtilase family protein
		Zm00001d009193	-2.36984	-1.15538	AT5G26930.1	GATA23	GATA transcription factor 23
		Zm00001d011187	-1.2023	-1.81587	AT3G21330.1	AT3G21330	basic helix-loop-helix (bHLH) DNA-binding superfamily protein
		Zm00001d015798	-1.92919	-1.95943	AT2G04160.1	AIR3	Subtilisin-like serine endopeptidase family protein
		Zm00001d017462	-1.60489	-2.44097	AT4G17500.1	ERF-1	ethylene responsive element binding factor 1
		Zm00001d017992	1.73123	-	AT1G59970.1	AT5-MMP	Matrixin family protein
		Zm00001d018056	-1.25751	1.10029	AT1G26945.1	KDR	basic helix-loop-helix (bHLH) DNA-binding superfamily protein
		Zm00001d020017	-1.75321	-1.65524	AT1G04110.1	SDD1	Subtilase family protein
		Zm00001d020492	-4.34178	-5.45602	AT1G80840.1	WRKY40	WRKY DNA-binding protein 40
		Zm00001d020495	-2.6325	-4.30424	AT4G31800.2	WRKY18	WRKY DNA-binding protein 18
		Zm00001d021205	-10.1398	-	AT4G25470.1	CBF2	C-repeat/DRE binding factor 2
		Zm00001d021208	-1.0027	-	AT4G25470.1	CBF2	C-repeat/DRE binding factor 2
		Zm00001d023616	-2.88034	-3.32487	AT3G56400.1	WRKY70	WRKY DNA-binding protein 70
		Zm00001d024268	-1.51223	-3.3545	AT1G56010.2	NAC1	NAC domain containing protein 1
		Zm00001d026448	-1.92293	-1.47595	AT4G36920.2	AP2	Integrase-type DNA-binding superfamily protein
		Zm00001d026697	-1.28391	-1.7533	AT1G79850.1	RPS17	ribosomal protein S17
		Zm00001d027387	-1.09264	-1.0562	AT1G04110.1	SDD1	Subtilase family protein
		Zm00001d027732	1.32487	-	AT4G26330.2	UNE17	Subtilisin-like serine endopeptidase family protein
		Zm00001d028408	5.58421	3.01256	AT4G27670.1	HSP21	heat shock protein 21
		Zm00001d028472	-1.30056	-1.31179	AT3G06250.3	FRS7	FAR1-related sequence 7
		Zm00001d029201	-1.34327	-1.35552	AT1G05190.1	EMB2394	Ribosomal protein L6 family
		Zm00001d032024	-1.04871	-1.10899	AT4G38620.1	MYB4	myb domain protein 4
		Zm00001d033194	-1.57391	-1.33086	AT5G67360.1	ARA12	Subtilase family protein
		Zm00001d033215	-1.13062	-1.81956	AT5G06510.3	NF-YA10	nuclear factor Y%2C subunit A10
		Zm00001d034970	-1.06779	-1.4465	AT3G44330.1	AT3G44330	M28 Zn-peptidase nicastrin
		Zm00001d036307	-1.73732	-1.09306	ATCG00180.1	RPOC1	DNA-directed RNA polymerase family protein
		Zm00001d036827	-3.6428	-2.83438	AT4G26760.1	MAP65-2	microtubule-associated protein 65-2
		Zm00001d037221	-1.41298	-2.04415	AT1G69690.1	TCP15	TCP family transcription factor
		Zm00001d038250	-1.27498	-	AT1G11040.1	AT1G11040	HSP40/DnaJ peptide-binding protein
		Zm00001d038270	-1.05275	-1.50298	AT2G38090.1	AT2G38090	Duplicated homeodomain-like superfamily protein
		Zm00001d040464	-1.27045	-1.35045	AT1G49010.1	MYBS1	Duplicated homeodomain-like superfamily protein
		Zm00001d042641	-1.68535	-	AT1G22910.2	AT1G22910	RNA-binding (RRM/RBD/RNP motifs) family protein
		Zm00001d043972	-1.56034	-1.29129	AT3G27830.2	RPL12-A	ribosomal protein L12-A
		Zm00001d044242	-1.88295	-2.72403	AT3G21330.1	AT3G21330	basic helix-loop-helix (bHLH) DNA-binding superfamily protein
		Zm00001d044771	-1.73594	-3.3963	AT1G70170.1	MMP	matrix metalloproteinase
		Zm00001d045400	-9.27239	-3.78985	AT5G06710.1	HAT14	homeobox leucine zipper protein
		Zm00001d045661	-2.50024	-2.42181	AT1G25440.1	BBX15	B-box type zinc finger protein with CCT domain-containing protein
		Zm00001d046332	-1.18272	-1.09262	AT1G29950.2	SACL3	basic helix-loop-helix (bHLH) DNA-binding superfamily protein
		Zm00001d048309	-1.44915	-1.56225	AT3G28857.1	PRE5	basic helix-loop-helix (bHLH) DNA-binding family protein
		Zm00001d049158	-1.00888	-1.45914	AT3G23690.1	CIL2	basic helix-loop-helix (bHLH) DNA-binding superfamily protein
		Zm00001d053020	-2.31536	-2.05082	AT1G58100.1	TCP8	TCP family transcription factor
		Zm00001d053713	-1.35746	-1.07387	AT3G27160.1	GHS1	Ribosomal protein S21 family protein
		Zm00001d053746	-2.53079	-2.87848	AT2G25000.4	WRKY60	WRKY DNA-binding protein 60
		Zm00001d053819	-1.0595	-2.91295	AT1G30330.3	ARF6	auxin response factor 6
	homeostatic process	Zm00001d004957	-1.2715	-1.51529	AT5G05690.1	CYP90A	Cytochrome P450 superfamily protein
		Zm00001d018238	-2.34815	-3.18836	AT5G06690.1	TRXL2.1	WCRKC thioredoxin 1
		Zm00001d022518	-1.59327	-2.91059	AT1G08570.2	ACHT4	atypical CYS HIS rich thioredoxin 4
		Zm00001d038018	-1.51033	-1.6753	AT5G58530.1	AT5G58530	Glutaredoxin family protein
		Zm00001d039647	-1.38437	-2.24082	AT1G15460.2	BOR4	Encodes a efflux-type boron transporter
		Zm00001d044841	-2.18994	-1.23764	AT5G39865.1	AT5G39865	Glutaredoxin family protein
		Zm00001d048819	-3.96426	-2.19763	AT5G36110.1	CYP716A1	cytochrome P450%2C family 716%2C subfamily A%2C polypeptide 1
	Others	Zm00001d001820	-3.25621	-3.19589	AT5G54190.1	PORA	protochlorophyllide oxidoreductase A
		Zm00001d008681	-1.98148	-1.62683	AT2G14960.1	GH3.1	Auxin responsive GH3
		Zm00001d012394	1.96489	1.14347	AT5G17230.4	PSY	15-cis-phytoene synthase
		Zm00001d013013	-1.55636	-1.29083	AT1G08520.1	ALB1	ALBINA 1
		Zm00001d016990	-2.44541	-1.54772	AT3G01380.1	AT3G01380	sulfatase and phosphatidylinositolglycan class N domain-containing protein
		Zm00001d023536	-1.75324	-1.64008	AT5G45930.1	CHLI2	magnesium chelatase subunit I
		Zm00001d039715	-2.85159	-1.50616	AT2G14960.1	GH3.1	Auxin responsive GH3
		Zm00001d042584	-1.05484	-1.21293	AT2G02500.2	ISPD	2-C-methyl-D-erythritol 4-phosphate cytidylyltransferase
		Zm00001d045138	-2.05764	-	AT5G34940.2	GUS3	glucuronidase 3
		Zm00001d053009	-1.4306	-1.46423	AT1G77590.1	LACS9	long chain acyl-CoA synthetase 9
		Zm00001d053974	-1.76098	-	AT5G48790.1	AT5G48790	LOW PSII ACCUMULATION protein (DUF1995)
