# Supplementary material for: Transcriptome Analysis of Tolerant and Susceptible Maize Genotypes Reveals Novel Insights about the Molecular Mechanisms Underlying Drought Responses in Leaves
Source: Int J Mol Sci. 2021 Jun 29;22(13):6980. doi: 10.3390/ijms22136980 (PMC8268334; doi:10.3390/ijms22136980)
Supplement: Supplementary file 1 [file ijms-22-06980-s001.zip › Supplementary Tables/Table S10.xlsx]

## Sheet: Table S10
Table S10: Drought responsive genes up-regulated in LX9801 with no changes observed in CML69 after 5D of drought stress treatment. The extent of differential expression is measured in terms of log2 Fold Change and hyphen (-) indicates failure to meet the significance cut off or undetected. Values in red and blue indicate the log2 Fold Change increases or decreases in the drought-stressed seedling…
Stress stage	GO/KEGG	gene	CML69(log2FoldChange)	LX9801(log2FoldChange)	Best-hit-A.th	Arabi-symbol	Annotation
C vs 3D	microtubule-based process	Zm00001d013367	1.04754	1.2393	AT4G14960.2	TUA6	Tubulin/FtsZ family protein
		Zm00001d028830	1.09903	2.72297	AT2G47500.1	CH	P-loop nucleoside triphosphate hydrolases superfamily protein
		Zm00001d040509	1.56225	1.68265	AT5G12250.1	TUB6	beta-6 tubulin
		Zm00001d052872	1.36575	2.01082	AT5G23860.2	TUB8	tubulin beta 8
	RNA biosynthetic process	Zm00001d021069	1.01344	1.30377	AT2G33480.1	NAC041	NAC domain containing protein 41
		Zm00001d024324	2.15127	-	AT1G28370.2	ERF11	ERF domain protein 11
		Zm00001d031673	-1.48213	1.18079	AT1G43160.1	RAP2.6	related to AP2 6
		Zm00001d035134	1.03504	1.57633	AT1G07050.1	FITNESS	CCT motif family protein
		Zm00001d051239	1.08626	2.30221	AT2G20880.1	ERF53	Integrase-type DNA-binding superfamily protein
	Endocytosis	Zm00001d008295	1.08266	-	AT1G10630.2	ARFA1F	ADP-ribosylation factor A1F
		Zm00001d028002	1.28052	-	AT5G65270.1	RABA4a	RAB GTPase homolog A4A
	Biosynthesis of amino acids	Zm00001d012407	1.29464	-	AT3G55440.1	TPI	triosephosphate isomerase
		Zm00001d013644	1.48647	1.85435	AT5G17920.2	ATMS1	Cobalamin-independent synthase family protein
	Phenylalanine metabolism	Zm00001d015459	1.14681	1.57842	AT3G21240.1	4CL2	4-coumarate:CoA ligase 2
C vs 5D	microtubule-based process	Zm00001d013367	-	1.26441	AT4G14960.2	TUA6	Tubulin/FtsZ family protein
		Zm00001d040509	-	1.68499	AT5G12250.1	TUB6	beta-6 tubulin
		Zm00001d052872	-	1.5411	AT5G23860.2	TUB8	tubulin beta 8
		Zm00001d028830	-	3.34947	AT2G47500.1	CH	P-loop nucleoside triphosphate hydrolases superfamily protein
	RNA biosynthetic process	Zm00001d021069	-	2.27378	AT2G33480.1	NAC041	NAC domain containing protein 41
		Zm00001d024324	-	2.25964	AT1G28370.2	ERF11	ERF domain protein 11
		Zm00001d051239	-	1.87593	AT2G20880.1	ERF53	Integrase-type DNA-binding superfamily protein
		Zm00001d031673	-	1.68992	AT1G43160.1	RAP2.6	related to AP2 6
		Zm00001d035134	-	1.0155	AT1G07050.1	FITNESS	CCT motif family protein
	Endocytosis	Zm00001d008295	-	2.60657	AT1G10630.2	ARFA1F	ADP-ribosylation factor A1F
		Zm00001d028002	-	1.18132	AT5G65270.1	RABA4a	RAB GTPase homolog A4A
	Biosynthesis of amino acids	Zm00001d012407	-	1.00915	AT3G55440.1	TPI	triosephosphate isomerase
		Zm00001d013644	-	2.72933	AT5G17920.2	ATMS1	Cobalamin-independent synthase family protein
	Phenylalanine metabolism	Zm00001d015459	-	2.3403	AT3G21240.1	4CL2	4-coumarate:CoA ligase 2
