# Supplementary material for: Transcriptome Analysis of Tolerant and Susceptible Maize Genotypes Reveals Novel Insights about the Molecular Mechanisms Underlying Drought Responses in Leaves
Source: Int J Mol Sci. 2021 Jun 29;22(13):6980. doi: 10.3390/ijms22136980 (PMC8268334; doi:10.3390/ijms22136980)
Supplement: Supplementary file 1 [file ijms-22-06980-s001.zip › Supplementary Tables/Table S11.xlsx]

## Sheet: Table S11
Table S11: Drought responsive genes down-regulated in LX9801 with no changes observed in CML69 after 5D of drought stress treatment. The extent of differential expression is measured in terms of log2 Fold Change and hyphen (-) indicates failure to meet the significance cut off or undetected. Values in red and blue indicate the log2 Fold Change increases or decreases in the drought-stressed seedli…
Stress stage	GO/KEGG	gene	CML69(log2FoldChange)	LX9801(log2FoldChange)	Best-hit-A.th	Arabi-symbol	Annotation
C vs 3D	defense response	Zm00001d007188	-1.13845	-1.76388	AT2G27050.1	EIL1	ETHYLENE-INSENSITIVE3-like 1
		Zm00001d007379	1.01884	-			CASP-like protein 1U2
		Zm00001d012322	-1.23027	-	AT4G37370.1	CYP81D8	cytochrome P450%2C family 81%2C subfamily D%2C polypeptide 8
		Zm00001d023282	-1.34483	-	AT1G08810.1	MYB60	myb domain protein 60
		Zm00001d033241	1.03144	-2.84892	AT4G21120.1	CAT1	cationic amino acid transporter 1
		Zm00001d033385	1.29004	-2.31482	AT3G50760.1	GATL2	galacturonosyltransferase-like 2
		Zm00001d034674	-1.30041	-2.27654	AT2G37900.1	AT2G37900	Major facilitator superfamily protein
		Zm00001d035243	-1.11908	-1.51916	AT5G49630.1	AAP6	amino acid permease 6
		Zm00001d037342	-2.57733	-2.46673	AT2G01660.2	PDLP6	plasmodesmata-located protein 6
		Zm00001d053433	-1.00307	-1.97729	AT2G20030.1	AT2G20030	RING/U-box superfamily protein
	phenylpropanoid metabolic process	Zm00001d035562	-1.86384	-2.98442	AT1G19715.1	AT1G19715	Mannose-binding lectin superfamily protein
		Zm00001d052480	-1.72579	-2.01794	AT1G05560.1	UGT75B1	UDP-glucosyltransferase 75B1
		Zm00001d052493	-1.35913	-1.08502	AT5G19140.1	AILP1	aluminum induced protein with YGL and LRDR motifs
	response to abiotic stimulus	Zm00001d026486	-2.11434	-1.6913	AT5G25190.1	ESE3	Integrase-type DNA-binding superfamily protein
		Zm00001d027598	-1.02535	-1.27625	AT1G04500.3	AT1G04500	CCT motif family protein
		Zm00001d050241	-3.33819	-1.23933	AT1G70370.2	PG2	polygalacturonase 2
	Others	Zm00001d003144	-1.75014	-2.87263	AT3G48310.1	CYP71A22	cytochrome P450%2C family 71%2C subfamily A%2C polypeptide 22
		Zm00001d014698	-1.04497	-1.34411	AT5G43270.3	SPL2	squamosa promoter binding protein-like 2
		Zm00001d020604	-1.02713	-	AT3G27925.2	DEG1	DegP protease 1
		Zm00001d028397	-1.00048	-1.25643	AT4G24230.1	ACBP3	acyl-CoA-binding domain 3
		Zm00001d031653	-1.02414	-2.13218	AT5G41080.2	GDPD2	PLC-like phosphodiesterases superfamily protein
		Zm00001d033152	-1.09025	-	AT3G26300.1	CYP71B34	cytochrome P450%2C family 71%2C subfamily B%2C polypeptide 34
		Zm00001d037466	1.52613	-	AT1G20950.1	AT1G20950	Phosphofructokinase family protein
		Zm00001d042256	-1.04462	-1.36939	AT3G26700.3	AT3G26700	Protein kinase superfamily protein
		Zm00001d053761	-1.11501	-	AT4G03390.2	SRF3	STRUBBELIG-receptor family 3
	Galactose metabolism	Zm00001d031303	-2.04285	-1.42673	AT3G57520.1	RS2	raffinose synthase
	Glycerophospholipid metabolism	Zm00001d040076	-1.02841	-	AT1G15110.4	PSS1	phosphatidylserine synthase 2
	Phenylalanine, tyrosine and tryptophan biosynthesis	Zm00001d020008	-2.16398	-3.04802	AT2G04400.1	IGPS	indole-3-glycerol phosphate synthase
C vs 5D	defense response	Zm00001d007188	-	-1.68372	AT2G27050.1	EIL1	ETHYLENE-INSENSITIVE3-like 1
		Zm00001d007379	-	-2.18528			CASP-like protein 1U2
		Zm00001d012322	-	-1.31247	AT4G37370.1	CYP81D8	cytochrome P450%2C family 81%2C subfamily D%2C polypeptide 8
		Zm00001d023282	-	-1.05659	AT1G08810.1	MYB60	myb domain protein 60
		Zm00001d033241	-	-3.38288	AT4G21120.1	CAT1	cationic amino acid transporter 1
		Zm00001d033385	-	-1.748	AT3G50760.1	GATL2	galacturonosyltransferase-like 2
		Zm00001d034674	-	-1.92921	AT2G37900.1	AT2G37900	Major facilitator superfamily protein
		Zm00001d035243	-	-3.54157	AT5G49630.1	AAP6	amino acid permease 6
		Zm00001d037342	-	-2.23955	AT2G01660.2	PDLP6	plasmodesmata-located protein 6
		Zm00001d053433	-	-2.87258	AT2G20030.1	AT2G20030	RING/U-box superfamily protein
	phenylpropanoid metabolic process	Zm00001d035562	-	-1.89283	AT1G19715.1	AT1G19715	Mannose-binding lectin superfamily protein
		Zm00001d052480	-	-2.55377	AT1G05560.1	UGT75B1	UDP-glucosyltransferase 75B1
		Zm00001d052493	-	-2.38601	AT5G19140.1	AILP1	aluminum induced protein with YGL and LRDR motifs
	response to abiotic stimulus	Zm00001d026486	-	-1.24406	AT5G25190.1	ESE3	ETHYLENE AND SALT INDUCIBLE 3
		Zm00001d027598	-	-1.26526	AT1G04500.3	AT1G04500	CCT motif family protein
		Zm00001d050241	-	-1.73601	AT1G70370.2	PG2	polygalacturonase 2
	Others	Zm00001d003144	-	-3.73905	AT3G48310.1	CYP71A22	cytochrome P450%2C family 71%2C subfamily A%2C polypeptide 22
		Zm00001d014698	-	-1.2839	AT5G43270.3	SPL2	squamosa promoter binding protein-like 2
		Zm00001d020604	-	-1.03569	AT3G27925.2	DEG1	DegP protease 1
		Zm00001d028397	-	-1.2563	AT4G24230.1	ACBP3	acyl-CoA-binding domain 3
		Zm00001d031653	-	-2.14259	AT5G41080.2	GDPD2	PLC-like phosphodiesterases superfamily protein
		Zm00001d033152	-	-2.31498	AT3G26300.1	CYP71B34	cytochrome P450%2C family 71%2C subfamily B%2C polypeptide 34
		Zm00001d037466	-	-1.57236	AT1G20950.1	AT1G20950	Phosphofructokinase family protein
		Zm00001d042256	-	-1.38596	AT3G26700.3	AT3G26700	Protein kinase superfamily protein
		Zm00001d053761	-	-2.20169	AT4G03390.2	SRF3	STRUBBELIG-receptor family 3
	Galactose metabolism	Zm00001d031303	-	-3.96616	AT3G57520.1	RS2	raffinose synthase
	Glycerophospholipid metabolism	Zm00001d040076	-	-1.18509	AT1G15110.4	PSS1	phosphatidylserine synthase 2
	Phenylalanine, tyrosine and tryptophan biosynthesis	Zm00001d020008	-	-4.90207	AT2G04400.1	IGPS	indole-3-glycerol phosphate synthase
