# Supplementary material for: Transcriptome Analysis of Tolerant and Susceptible Maize Genotypes Reveals Novel Insights about the Molecular Mechanisms Underlying Drought Responses in Leaves
Source: Int J Mol Sci. 2021 Jun 29;22(13):6980. doi: 10.3390/ijms22136980 (PMC8268334; doi:10.3390/ijms22136980)
Supplement: Supplementary file 1 [file ijms-22-06980-s001.zip › Supplementary Tables/Table S12.xlsx]

## Sheet: Table S12
Table S12. The primers of ten differentially expressed genes used for qRT-PCR verification
ID	Primer_F	Primer_R
Zm00001d017547	GCCAAAAGGCACTGAAGAAG	TCCTCTCATCCTCCATGGTC
Zm00001d040567	GCTCTCCGATGAGCTAGGTG	CAGATAGAGGGAACGCTTCG
Zm00001d034072	GATTGCGGATGTCTCCAAGT	CAAGGAACTCTGGGTTGGAA
Zm00001d040190	CGTTTCCATTCCGTTTTCAT	CACTCGTCACGCTTAGTCCA
Zm00001d049541	GCTTGCTTGGTCCTCGTATC	AGTCTAGGCCAGCCAGAGTG
Zm00001d008727	CTTACCTGCCTGTCGAGGAC	AGCTTCACGTGGATCTTGCT
XLOC_029277	CGCAGCCTTCACAAGGTAAT	TACCAAAACGCTGCAAGATG
XLOC_050594	TCCAATCCACAAGGGGTAGA	AATTACATCGGAGCGTTTCC
XLOC_053771	ATCATGGGACGAGCACTAGG	TATTCCCACGGTCCTACTCG
XLOC_049796	GGCAGAATAAATTGGGTTGG	CCTTTTTCCTTCCTTGAATCTTT
